# Supplementary material for: A Mid-Density Single-Nucleotide Polymorphism Panel for Molecular Applications in Cowpea (Vigna unguiculata (L.) Walp)
Source: Int J Genomics. 2024 Jan 9;2024:9912987. doi: 10.1155/2024/9912987 (PMC10791481; doi:10.1155/2024/9912987)
Supplement: Supplementary 2 — Table 1: list of markers selected to constitute the cowpea mid-density genotyping panel V1.0. and the SNP design sequences. [file 9912987.f2.txt]

Supplementary Table 1 List of markers selected to constitute the Cowpea mid-density genotyping panel V1.0. and the SNP design sequences
Marker Name	Reference Genome plus Version Used	Chrom	Chrom Pos	VariantAllelesDef	Marker_Type	MAF_2714	MAF_184	nocall	cM/Mb	Selection for markers	Selection for Markers Gapfill added
2_24641	Cowpea_IT97K-499-35_v1.0	Vu01	78762	[T/C]	SNP	0.431	0.462	1.437	1.688	PASS	PASS
2_19235	Cowpea_IT97K-499-35_v1.0	Vu01	224200	[G/A]	SNP	0.422	0.272	0.59	1.688	PASS	PASS
2_27984	Cowpea_IT97K-499-35_v1.0	Vu01	385444	[A/C]	SNP	0.467	0.367	0.258	1.688	PASS	PASS
2_16623	Cowpea_IT97K-499-35_v1.0	Vu01	528696	[C/T]	SNP	0.495	0.245	0.111	1.688	PASS	PASS
2_12556	Cowpea_IT97K-499-35_v1.0	Vu01	674116	[A/G]	SNP	0.365	0.269	0.147	1.688	PASS	PASS
2_54157	Cowpea_IT97K-499-35_v1.0	Vu01	840388	[T/C]	SNP	0.363	0.27	0.59	1.688	PASS	PASS
2_19327	Cowpea_IT97K-499-35_v1.0	Vu01	991646	[C/T]	SNP	0.356	0.238	0.479	1.688	PASS	PASS
2_55445	Cowpea_IT97K-499-35_v1.0	Vu01	1128064	[C/T]	SNP	0.212	0.262	0.442	1.688	PASS	PASS
2_28825	Cowpea_IT97K-499-35_v1.0	Vu01	1269293	[T/C]	SNP	0.251	0.167	0.479	1.688	PASS	PASS
2_28136	Cowpea_IT97K-499-35_v1.0	Vu01	1468530	[A/C]	SNP	0.45	0.357	1.326	1.688	PASS	PASS
2_25371	Cowpea_IT97K-499-35_v1.0	Vu01	1715942	[C/T]	SNP	0.291	0.401	0.516	1.655	PASS	PASS
2_29496	Cowpea_IT97K-499-35_v1.0	Vu01	1867588	[A/G]	SNP	0.23	0.34	0.442	1.626	PASS	PASS
2_49900	Cowpea_IT97K-499-35_v1.0	Vu01	2056510	[A/C]	SNP	0.265	0.375	0.516	1.59	PASS	PASS
2_40451	Cowpea_IT97K-499-35_v1.0	Vu01	2206327	[C/T]	SNP	0.334	0.401	0.442	1.562	PASS	PASS
2_09060	Cowpea_IT97K-499-35_v1.0	Vu01	2356889	[C/T]	SNP	0.367	0.285	0.111	1.534	PASS	PASS
2_29605	Cowpea_IT97K-499-35_v1.0	Vu01	2542990	[A/G]	SNP	0.182	0.462	0.368	1.499	PASS	PASS
2_30402	Cowpea_IT97K-499-35_v1.0	Vu01	2705447	[G/A]	SNP	0.324	0.383	0.368	1.47	PASS	PASS
2_10738	Cowpea_IT97K-499-35_v1.0	Vu01	2868156	[A/C]	SNP	0.275	0.448	0.368	1.441	PASS	PASS
2_47368	Cowpea_IT97K-499-35_v1.0	Vu01	3032331	[T/C]	SNP	0.311	0.427	1.142	1.412	PASS	PASS
2_50498	Cowpea_IT97K-499-35_v1.0	Vu01	3204214	[C/A]	SNP	0.498	0.484	0.111	1.382	PASS	PASS
2_14329	Cowpea_IT97K-499-35_v1.0	Vu01	3396929	[G/A]	SNP	0.236	0.285	0.258	1.348	PASS	PASS
2_21017	Cowpea_IT97K-499-35_v1.0	Vu01	3642059	[T/C]	SNP	0.252	0.253	0.295	1.306	PASS	PASS
2_50771	Cowpea_IT97K-499-35_v1.0	Vu01	3848223	[T/C]	SNP	0.294	0.416	0.553	1.272	PASS	PASS
2_48591	Cowpea_IT97K-499-35_v1.0	Vu01	4050274	[G/C]	SNP	0.239	0.421	1.29	1.239	PASS	PASS
2_45826	Cowpea_IT97K-499-35_v1.0	Vu01	4415860	[T/C]	SNP	0.232	0.375	4.311	1.179	PASS	PASS
2_18399	Cowpea_IT97K-499-35_v1.0	Vu01	4617471	[C/T]	SNP	0.262	0.37	0.442	1.147	PASS	PASS
2_26693	Cowpea_IT97K-499-35_v1.0	Vu01	4837891	[C/T]	SNP	0.293	0.367	0.442	1.112	PASS	PASS
2_38632	Cowpea_IT97K-499-35_v1.0	Vu01	6313287	[A/G]	SNP	0.374	0.317	1.253	0.891	PASS	PASS
2_03520	Cowpea_IT97K-499-35_v1.0	Vu01	6647764	[C/T]	SNP	0.158	0.302	0.368	0.843	PASS	PASS
2_23136	Cowpea_IT97K-499-35_v1.0	Vu01	6884482	[C/T]	SNP	0.171	0.296	0.184	0.81	PASS	PASS
2_45042	Cowpea_IT97K-499-35_v1.0	Vu01	7979536	[T/C]	SNP	0.485	0.342	0.479	0.662	PASS	PASS
2_52504	Cowpea_IT97K-499-35_v1.0	Vu01	8462457	[T/C]	SNP	0.435	0.386	0.405	0.6	PASS	PASS
2_39077	Cowpea_IT97K-499-35_v1.0	Vu01	8922190	[A/G]	SNP	0.416	0.374	1.29	0.543	PASS	PASS
2_43539	Cowpea_IT97K-499-35_v1.0	Vu01	9793961	[G/A]	SNP	0.241	0.389	0.442	0.442	PASS	PASS
2_03707	Cowpea_IT97K-499-35_v1.0	Vu01	10245278	[C/T]	SNP	0.278	0.448	0.147	0.393	PASS	PASS
2_42456	Cowpea_IT97K-499-35_v1.0	Vu01	10875563	[A/G]	SNP	0.261	0.404	0.479	0.331	PASS	PASS
2_52871	Cowpea_IT97K-499-35_v1.0	Vu01	12647884	[G/A]	SNP	0.391	0.457	0.405	0.193	PASS	PASS
2_42993	Cowpea_IT97K-499-35_v1.0	Vu01	13690484	[G/A]	SNP	0.444	0.407	1.179	0.145	PASS	PASS
2_38383	Cowpea_IT97K-499-35_v1.0	Vu01	16609836	[G/A]	SNP	0.128	0.194	0.258	0.174		FAIL
2_18543	Cowpea_IT97K-499-35_v1.0	Vu01	18489546	[A/G]	SNP	0.349	0.348	0.626	0.335	PASS	PASS
2_37941	Cowpea_IT97K-499-35_v1.0	Vu01	18982477	[C/A]	SNP	0.429	0.437	0.516	0.396	PASS	PASS
2_43251	Cowpea_IT97K-499-35_v1.0	Vu01	19491972	[A/G]	SNP	0.423	0.445	0.516	0.467	PASS	PASS
2_51662	Cowpea_IT97K-499-35_v1.0	Vu01	20068331	[T/G]	SNP	0.339	0.328	0.7	0.557	PASS	PASS
2_53036	Cowpea_IT97K-499-35_v1.0	Vu01	20889089	[A/G]	SNP	0.34	0.47	0.442	0.702	PASS	PASS
2_45053	Cowpea_IT97K-499-35_v1.0	Vu01	21514123	[C/T]	SNP	0.273	0.289	7.222	0.823	PASS	PASS
2_49393	Cowpea_IT97K-499-35_v1.0	Vu01	22586515	[T/C]	SNP	0.232	0.378	0.442	1.052	PASS	PASS
2_14749	Cowpea_IT97K-499-35_v1.0	Vu01	22868897	[C/T]	SNP	0.265	0.285	0.037	1.116	PASS	PASS
2_10413	Cowpea_IT97K-499-35_v1.0	Vu01	23157868	[C/A]	SNP	0.214	0.25	0.258	1.183	PASS	PASS
2_45418	Cowpea_IT97K-499-35_v1.0	Vu01	23356108	[T/C]	SNP	0.359	0.476	0.405	1.23	PASS	PASS
2_18418	Cowpea_IT97K-499-35_v1.0	Vu01	23539230	[C/A]	SNP	0.353	0.476	0.111	1.274	PASS	PASS
2_30485	Cowpea_IT97K-499-35_v1.0	Vu01	23718464	[C/T]	SNP	0.344	0.488	9.617	1.317	PASS	PASS
2_47388	Cowpea_IT97K-499-35_v1.0	Vu01	23894809	[G/A]	SNP	0.372	0.457	0.258	1.359	PASS	PASS
2_00019	Cowpea_IT97K-499-35_v1.0	Vu01	24069433	[C/T]	SNP	0.251	0.424	0.258	1.402	PASS	PASS
2_09926	Cowpea_IT97K-499-35_v1.0	Vu01	24236268	[T/C]	SNP	0.214	0.418	0.295	1.443	PASS	PASS
2_04024	Cowpea_IT97K-499-35_v1.0	Vu01	24410052	[A/G]	SNP	0.199	0.261	0.037	1.486	PASS	PASS
2_09446	Cowpea_IT97K-499-35_v1.0	Vu01	24573373	[T/C]	SNP	0.207	0.288	0.332	1.527	PASS	PASS
2_48587	Cowpea_IT97K-499-35_v1.0	Vu01	24794142	[G/A]	SNP	0.488	0.432	5.711	1.582	PASS	PASS
2_46985	Cowpea_IT97K-499-35_v1.0	Vu01	24949291	[A/G]	SNP	0.409	0.475	0.553	1.621	PASS	PASS
2_02193	Cowpea_IT97K-499-35_v1.0	Vu01	25138711	[T/G]	SNP	0.225	0.34	0.332	1.669	PASS	PASS
2_51863	Cowpea_IT97K-499-35_v1.0	Vu01	25333903	[G/T]	SNP	0.294	0.282	1.216	1.718	PASS	PASS
2_47290	Cowpea_IT97K-499-35_v1.0	Vu01	25521632	[G/A]	SNP	0.473	0.407	1.437	1.766	PASS	PASS
2_51849	Cowpea_IT97K-499-35_v1.0	Vu01	25688399	[C/T]	SNP	0.292	0.288	0.516	1.808	PASS	PASS
2_24484	Cowpea_IT97K-499-35_v1.0	Vu01	25838942	[A/G]	SNP	0.25	0.196	0	1.847	PASS	PASS
2_40441	Cowpea_IT97K-499-35_v1.0	Vu01	26223890	[C/T]	SNP	0.242	0.268	7.148	1.945	PASS	PASS
2_31219	Cowpea_IT97K-499-35_v1.0	Vu01	26342590	[T/C]	SNP	0.318	0.291	0.405	1.975	PASS	PASS
2_31645	Cowpea_IT97K-499-35_v1.0	Vu01	26481381	[A/C]	SNP	0.275	0.217	0.442	2.01	PASS	PASS
2_53515	Cowpea_IT97K-499-35_v1.0	Vu01	26723193	[G/A]	SNP	0.292	0.391	0.516	2.071	PASS	PASS
2_26487	Cowpea_IT97K-499-35_v1.0	Vu01	26982283	[T/C]	SNP	0.387	0.476	0.958	2.136	PASS	PASS
2_32569	Cowpea_IT97K-499-35_v1.0	Vu01	27358366	[A/T]	SNP	0.298	0.421	0.147	2.23	PASS	PASS
2_34327	Cowpea_IT97K-499-35_v1.0	Vu01	27510499	[A/T]	SNP	0.371	0.438	0.147	2.267	PASS	PASS
2_51494	Cowpea_IT97K-499-35_v1.0	Vu01	27704236	[A/G]	SNP	0.442	0.47	3.5	2.315	PASS	PASS
2_02626	Cowpea_IT97K-499-35_v1.0	Vu01	28095730	[A/G]	SNP	0.243	0.266	0.111	2.409	PASS	PASS
2_07656	Cowpea_IT97K-499-35_v1.0	Vu01	28494308	[C/A]	SNP	0.458	0.478	1.142	2.504	PASS	PASS
2_01341	Cowpea_IT97K-499-35_v1.0	Vu01	28593318	[C/A]	SNP	0.258	0.188	0.405	2.527	PASS	PASS
2_03642	Cowpea_IT97K-499-35_v1.0	Vu01	28790543	[T/C]	SNP	0.366	0.337	0.184	2.573	PASS	PASS
2_17039	Cowpea_IT97K-499-35_v1.0	Vu01	28881225	[C/T]	SNP	0.346	0.269	0.147	2.594	PASS	PASS
2_24242	Cowpea_IT97K-499-35_v1.0	Vu01	28975073	[G/A]	SNP	0.39	0.382	2.063	2.615	PASS	PASS
2_20176	Cowpea_IT97K-499-35_v1.0	Vu01	29069183	[T/C]	SNP	0.345	0.321	0.147	2.636	PASS	PASS
2_04295	Cowpea_IT97K-499-35_v1.0	Vu01	29182007	[A/G]	SNP	0.468	0.497	0.258	2.662	PASS	PASS
2_26264	Cowpea_IT97K-499-35_v1.0	Vu01	29272668	[C/T]	SNP	0.343	0.397	0.442	2.682	PASS	PASS
2_28068	Cowpea_IT97K-499-35_v1.0	Vu01	29362526	[T/C]	SNP	0.312	0.321	0.147	2.702	PASS	PASS
2_21544	Cowpea_IT97K-499-35_v1.0	Vu01	29447427	[G/A]	SNP	0.342	0.375	0.332	2.72	PASS	PASS
2_06450	Cowpea_IT97K-499-35_v1.0	Vu01	29539230	[G/A]	SNP	0.19	0.334	0.184	2.74	PASS	PASS
2_20342	Cowpea_IT97K-499-35_v1.0	Vu01	29642715	[T/C]	SNP	0.328	0.337	0.368	2.763	PASS	PASS
2_08406	Cowpea_IT97K-499-35_v1.0	Vu01	29729097	[A/C]	SNP	0.455	0.476	0.405	2.781	PASS	PASS
2_39955	Cowpea_IT97K-499-35_v1.0	Vu01	29819046	[A/G]	SNP	0.325	0.378	2.432	2.801	PASS	PASS
2_38654	Cowpea_IT97K-499-35_v1.0	Vu01	29924858	[C/A]	SNP	0.337	0.432	0.368	2.823	PASS	PASS
2_27709	Cowpea_IT97K-499-35_v1.0	Vu01	30102352	[T/G]	SNP	0.315	0.383	0.958	2.86	PASS	PASS
2_42621	Cowpea_IT97K-499-35_v1.0	Vu01	30454413	[T/C]	SNP	0.151	0.137	1.069	2.931		PASS
2_24758	Cowpea_IT97K-499-35_v1.0	Vu01	30613298	[C/A]	SNP	0.245	0.334	0.405	2.963	PASS	PASS
2_18958	Cowpea_IT97K-499-35_v1.0	Vu01	30700797	[G/A]	SNP	0.5	0.489	0.368	2.98	PASS	PASS
2_12102	Cowpea_IT97K-499-35_v1.0	Vu01	30910576	[C/T]	SNP	0.486	0.492	1.29	3.02	PASS	PASS
2_04037	Cowpea_IT97K-499-35_v1.0	Vu01	30992246	[T/C]	SNP	0.41	0.405	0.184	3.035	PASS	PASS
2_44300	Cowpea_IT97K-499-35_v1.0	Vu01	31068197	[A/C]	SNP	0.208	0.257	0.59	3.049	PASS	PASS
2_45864	Cowpea_IT97K-499-35_v1.0	Vu01	31147784	[A/G]	SNP	0.474	0.438	0.442	3.064	PASS	PASS
2_11964	Cowpea_IT97K-499-35_v1.0	Vu01	31224155	[A/G]	SNP	0.372	0.481	0.184	3.078	PASS	PASS
2_43235	Cowpea_IT97K-499-35_v1.0	Vu01	31312913	[G/T]	SNP	0.306	0.258	0.221	3.094	PASS	PASS
2_12931	Cowpea_IT97K-499-35_v1.0	Vu01	31545417	[A/G]	SNP	0.371	0.266	0.221	3.135	PASS	PASS
2_17832	Cowpea_IT97K-499-35_v1.0	Vu01	31623688	[A/C]	SNP	0.291	0.25	0.995	3.149	PASS	PASS
2_09234	Cowpea_IT97K-499-35_v1.0	Vu01	31701702	[T/C]	SNP	0.234	0.287	0.368	3.162	PASS	PASS
2_47233	Cowpea_IT97K-499-35_v1.0	Vu01	31776332	[T/C]	SNP	0.332	0.323	0.59	3.175	PASS	PASS
2_42525	Cowpea_IT97K-499-35_v1.0	Vu01	31853596	[T/C]	SNP	0.248	0.329	0.368	3.188	PASS	PASS
2_39160	Cowpea_IT97K-499-35_v1.0	Vu01	31930216	[A/G]	SNP	0.321	0.353	0.479	3.201	PASS	PASS
2_33854	Cowpea_IT97K-499-35_v1.0	Vu01	32023774	[G/C]	SNP	0.343	0.407	0.59	3.216	PASS	PASS
2_11735	Cowpea_IT97K-499-35_v1.0	Vu01	32122161	[G/A]	SNP	0.362	0.448	0.184	3.232	PASS	PASS
2_16440	Cowpea_IT97K-499-35_v1.0	Vu01	32231301	[T/C]	SNP	0.379	0.489	0.221	3.249	PASS	PASS
2_03922	Cowpea_IT97K-499-35_v1.0	Vu01	32304449	[C/T]	SNP	0.356	0.497	0.184	3.261	PASS	PASS
2_29544	Cowpea_IT97K-499-35_v1.0	Vu01	32397214	[G/T]	SNP	0.249	0.358	0.811	3.275	PASS	PASS
2_53544	Cowpea_IT97K-499-35_v1.0	Vu01	32508171	[T/C]	SNP	0.229	0.306	0.405	3.292	PASS	PASS
2_05461	Cowpea_IT97K-499-35_v1.0	Vu01	32582967	[G/T]	SNP	0.323	0.429	0.332	3.303	PASS	PASS
2_27687	Cowpea_IT97K-499-35_v1.0	Vu01	32671943	[A/G]	SNP	0.303	0.383	0.479	3.316	PASS	PASS
2_26498	Cowpea_IT97K-499-35_v1.0	Vu01	32770516	[A/G]	SNP	0.299	0.372	0.332	3.331	PASS	PASS
2_33502	Cowpea_IT97K-499-35_v1.0	Vu01	32897559	[G/C]	SNP	0.363	0.293	0.442	3.349	PASS	PASS
2_28819	Cowpea_IT97K-499-35_v1.0	Vu01	32989372	[G/A]	SNP	0.379	0.28	0.405	3.362	PASS	PASS
2_12719	Cowpea_IT97K-499-35_v1.0	Vu01	33064811	[G/A]	SNP	0.46	0.405	0.184	3.372	PASS	PASS
2_01525	Cowpea_IT97K-499-35_v1.0	Vu01	33140421	[G/T]	SNP	0.474	0.372	0.184	3.382	PASS	PASS
2_42366	Cowpea_IT97K-499-35_v1.0	Vu01	33210144	[C/T]	SNP	0.498	0.345	0.479	3.392	PASS	PASS
2_01989	Cowpea_IT97K-499-35_v1.0	Vu01	33300707	[G/A]	SNP	0.44	0.408	0.368	3.404	PASS	PASS
2_00560	Cowpea_IT97K-499-35_v1.0	Vu01	33480290	[A/G]	SNP	0.16	0.269	0.037	3.427	PASS	PASS
2_19957	Cowpea_IT97K-499-35_v1.0	Vu01	33624983	[A/C]	SNP	0.467	0.443	0.111	3.445	PASS	PASS
2_54021	Cowpea_IT97K-499-35_v1.0	Vu01	33698494	[A/C]	SNP	0.378	0.462	0.405	3.454	PASS	PASS
2_03648	Cowpea_IT97K-499-35_v1.0	Vu01	33766838	[C/T]	SNP	0.431	0.372	0.59	3.462	PASS	PASS
2_27091	Cowpea_IT97K-499-35_v1.0	Vu01	33847673	[C/T]	SNP	0.404	0.476	0.184	3.472	PASS	PASS
2_15821	Cowpea_IT97K-499-35_v1.0	Vu01	33915329	[T/C]	SNP	0.407	0.462	0.221	3.48	PASS	PASS
2_26428	Cowpea_IT97K-499-35_v1.0	Vu01	33985076	[T/G]	SNP	0.495	0.353	0.405	3.488	PASS	PASS
2_04783	Cowpea_IT97K-499-35_v1.0	Vu01	34055974	[T/C]	SNP	0.388	0.239	0.074	3.496	PASS	PASS
2_28826	Cowpea_IT97K-499-35_v1.0	Vu01	34121213	[C/A]	SNP	0.362	0.5	0.479	3.503	PASS	PASS
2_16481	Cowpea_IT97K-499-35_v1.0	Vu01	34187798	[G/T]	SNP	0.312	0.397	0.221	3.511	PASS	PASS
2_09018	Cowpea_IT97K-499-35_v1.0	Vu01	34254501	[T/C]	SNP	0.352	0.386	0.111	3.518	PASS	PASS
2_27388	Cowpea_IT97K-499-35_v1.0	Vu01	34345343	[G/T]	SNP	0.289	0.418	0.405	3.528	PASS	PASS
2_32005	Cowpea_IT97K-499-35_v1.0	Vu01	34420265	[G/A]	SNP	0.368	0.418	0.442	3.535	PASS	PASS
2_13275	Cowpea_IT97K-499-35_v1.0	Vu01	34493664	[G/A]	SNP	0.49	0.484	0.184	3.543	PASS	PASS
2_38756	Cowpea_IT97K-499-35_v1.0	Vu01	34573976	[T/C]	SNP	0.4	0.266	0.147	3.551	PASS	PASS
2_11507	Cowpea_IT97K-499-35_v1.0	Vu01	34645246	[A/G]	SNP	0.285	0.182	0.442	3.558	PASS	PASS
2_46692	Cowpea_IT97K-499-35_v1.0	Vu01	34711776	[T/C]	SNP	0.371	0.296	0.221	3.565	PASS	PASS
2_33402	Cowpea_IT97K-499-35_v1.0	Vu01	34777294	[T/A]	SNP	0.308	0.155	0.479	3.571	PASS	PASS
2_16913	Cowpea_IT97K-499-35_v1.0	Vu01	34857525	[G/A]	SNP	0.44	0.285	0.516	3.579	PASS	PASS
2_50979	Cowpea_IT97K-499-35_v1.0	Vu01	34921715	[C/T]	SNP	0.327	0.393	0.368	3.585	PASS	PASS
2_06602	Cowpea_IT97K-499-35_v1.0	Vu01	34986726	[A/G]	SNP	0.153	0.258	0.184	3.591	PASS	PASS
2_21190	Cowpea_IT97K-499-35_v1.0	Vu01	35050333	[G/A]	SNP	0.466	0.457	0.405	3.597	PASS	PASS
2_46935	Cowpea_IT97K-499-35_v1.0	Vu01	35114114	[C/A]	SNP	0.439	0.329	0.442	3.602	PASS	PASS
2_54804	Cowpea_IT97K-499-35_v1.0	Vu01	35202041	[C/T]	SNP	0.495	0.304	3.427	3.61	PASS	PASS
2_41147	Cowpea_IT97K-499-35_v1.0	Vu01	35265694	[T/C]	SNP	0.247	0.342	0.774	3.615	PASS	PASS
2_10490	Cowpea_IT97K-499-35_v1.0	Vu01	35329025	[A/C]	SNP	0.376	0.415	0.442	3.621	PASS	PASS
2_30503	Cowpea_IT97K-499-35_v1.0	Vu01	35413252	[T/C]	SNP	0.43	0.475	1.032	3.628	PASS	PASS
2_29177	Cowpea_IT97K-499-35_v1.0	Vu01	35481331	[C/T]	SNP	0.329	0.38	0.147	3.633	PASS	PASS
2_13537	Cowpea_IT97K-499-35_v1.0	Vu01	35544031	[C/T]	SNP	0.357	0.446	0.111	3.638	PASS	PASS
2_07038	Cowpea_IT97K-499-35_v1.0	Vu01	35609598	[A/G]	SNP	0.494	0.356	0.184	3.644	PASS	PASS
2_25986	Cowpea_IT97K-499-35_v1.0	Vu01	35673185	[A/G]	SNP	0.447	0.402	0.921	3.648	PASS	PASS
2_06347	Cowpea_IT97K-499-35_v1.0	Vu01	35742715	[C/A]	SNP	0.426	0.454	0.221	3.654	PASS	PASS
2_27019	Cowpea_IT97K-499-35_v1.0	Vu01	35826853	[T/G]	SNP	0.474	0.338	0.368	3.66	PASS	PASS
2_06596	Cowpea_IT97K-499-35_v1.0	Vu01	35894722	[C/T]	SNP	0.358	0.481	0.59	3.665	PASS	PASS
2_19030	Cowpea_IT97K-499-35_v1.0	Vu01	35960701	[G/A]	SNP	0.326	0.296	0.295	3.67	PASS	PASS
2_53203	Cowpea_IT97K-499-35_v1.0	Vu01	36048154	[A/G]	SNP	0.431	0.348	0.258	3.676	PASS	PASS
2_28738	Cowpea_IT97K-499-35_v1.0	Vu01	36114319	[G/T]	SNP	0.292	0.253	0.663	3.68	PASS	PASS
2_20261	Cowpea_IT97K-499-35_v1.0	Vu01	36195744	[T/C]	SNP	0.352	0.329	0.368	3.686	PASS	PASS
2_49620	Cowpea_IT97K-499-35_v1.0	Vu01	36267949	[T/G]	SNP	0.326	0.234	0.516	3.691	PASS	PASS
2_50685	Cowpea_IT97K-499-35_v1.0	Vu01	36342764	[G/T]	SNP	0.256	0.26	0.553	3.695	PASS	PASS
2_24195	Cowpea_IT97K-499-35_v1.0	Vu01	36519468	[C/A]	SNP	0.253	0.22	0.221	3.706	PASS	PASS
2_51175	Cowpea_IT97K-499-35_v1.0	Vu01	36640004	[G/A]	SNP	0.416	0.32	2.284	3.714	PASS	PASS
2_17838	Cowpea_IT97K-499-35_v1.0	Vu01	36770015	[G/A]	SNP	0.485	0.356	0.111	3.721	PASS	PASS
2_23240	Cowpea_IT97K-499-35_v1.0	Vu01	36839639	[T/C]	SNP	0.481	0.367	0.147	3.725	PASS	PASS
2_22126	Cowpea_IT97K-499-35_v1.0	Vu01	36909124	[G/A]	SNP	0.429	0.334	0.332	3.729	PASS	PASS
2_26276	Cowpea_IT97K-499-35_v1.0	Vu01	36974396	[C/T]	SNP	0.433	0.346	2.874	3.732	PASS	PASS
2_12879	Cowpea_IT97K-499-35_v1.0	Vu01	37077938	[T/G]	SNP	0.173	0.25	0.184	3.738	PASS	PASS
2_24263	Cowpea_IT97K-499-35_v1.0	Vu01	37162799	[G/A]	SNP	0.276	0.345	0.184	3.742	PASS	PASS
2_24393	Cowpea_IT97K-499-35_v1.0	Vu01	37224515	[G/A]	SNP	0.357	0.467	0.147	3.745	PASS	PASS
2_08538	Cowpea_IT97K-499-35_v1.0	Vu01	37305549	[A/G]	SNP	0.368	0.316	0.442	3.749	PASS	PASS
2_24429	Cowpea_IT97K-499-35_v1.0	Vu01	37453382	[T/C]	SNP	0.224	0.25	1.032	3.756	PASS	PASS
2_33902	Cowpea_IT97K-499-35_v1.0	Vu01	37534642	[A/T]	SNP	0.237	0.25	0.074	3.76	PASS	PASS
2_28558	Cowpea_IT97K-499-35_v1.0	Vu01	37636189	[G/A]	SNP	0.433	0.402	0.442	3.765	PASS	PASS
2_31788	Cowpea_IT97K-499-35_v1.0	Vu01	37709193	[G/T]	SNP	0.444	0.354	1.29	3.768	PASS	PASS
2_21298	Cowpea_IT97K-499-35_v1.0	Vu01	37772566	[A/G]	SNP	0.439	0.348	0.295	3.771	PASS	PASS
2_16410	Cowpea_IT97K-499-35_v1.0	Vu01	37847909	[T/G]	SNP	0.279	0.378	0.147	3.774	PASS	PASS
2_20125	Cowpea_IT97K-499-35_v1.0	Vu01	37924589	[A/C]	SNP	0.457	0.443	0.295	3.777	PASS	PASS
2_20858	Cowpea_IT97K-499-35_v1.0	Vu01	37990107	[T/C]	SNP	0.371	0.337	0.663	3.78	PASS	PASS
2_09250	Cowpea_IT97K-499-35_v1.0	Vu01	38050872	[T/G]	SNP	0.372	0.337	0.295	3.782	PASS	PASS
2_24337	Cowpea_IT97K-499-35_v1.0	Vu01	38120394	[G/A]	SNP	0.378	0.364	0.332	3.785	PASS	PASS
2_21246	Cowpea_IT97K-499-35_v1.0	Vu01	38233531	[C/T]	SNP	0.452	0.364	0.258	3.789	PASS	PASS
2_32950	Cowpea_IT97K-499-35_v1.0	Vu01	38381899	[A/T]	SNP	0.221	0.296	0.442	3.795	PASS	PASS
2_23847	Cowpea_IT97K-499-35_v1.0	Vu01	38447995	[T/C]	SNP	0.283	0.318	0.442	3.797	PASS	PASS
2_24724	Cowpea_IT97K-499-35_v1.0	Vu01	38552291	[T/C]	SNP	0.311	0.385	0.59	3.801	PASS	PASS
2_22046	Cowpea_IT97K-499-35_v1.0	Vu01	38612540	[G/A]	SNP	0.268	0.318	0.184	3.803	PASS	PASS
2_05233	Cowpea_IT97K-499-35_v1.0	Vu01	38724017	[A/G]	SNP	0.421	0.38	0.221	3.807	PASS	PASS
2_25885	Cowpea_IT97K-499-35_v1.0	Vu01	38790145	[A/G]	SNP	0.384	0.5	0.074	3.809	PASS	PASS
2_29528	Cowpea_IT97K-499-35_v1.0	Vu01	38861080	[A/G]	SNP	0.327	0.465	0.332	3.811	PASS	PASS
1_0856	Cowpea_IT97K-499-35_v1.0	Vu01	38932333	[T/G]	SNP	0.312	0.481	0.405	3.813	PASS	PASS
2_25584	Cowpea_IT97K-499-35_v1.0	Vu01	38999366	[T/G]	SNP	0.293	0.465	0.442	3.816	PASS	PASS
2_29709	Cowpea_IT97K-499-35_v1.0	Vu01	39066427	[C/T]	SNP	0.368	0.476	0.479	3.818	PASS	PASS
2_15778	Cowpea_IT97K-499-35_v1.0	Vu01	39127470	[T/G]	SNP	0.339	0.481	0.184	3.82	PASS	PASS
2_04568	Cowpea_IT97K-499-35_v1.0	Vu01	39221943	[C/T]	SNP	0.444	0.402	0.074	3.823	PASS	PASS
2_03016	Cowpea_IT97K-499-35_v1.0	Vu01	39302293	[C/T]	SNP	0.425	0.323	0.184	3.825	PASS	PASS
2_10120	Cowpea_IT97K-499-35_v1.0	Vu01	39371012	[G/A]	SNP	0.435	0.342	0.111	3.827	PASS	PASS
2_20027	Cowpea_IT97K-499-35_v1.0	Vu01	39445676	[A/C]	SNP	0.48	0.443	0.368	3.83	PASS	PASS
2_38145	Cowpea_IT97K-499-35_v1.0	Vu01	39580893	[G/A]	SNP	0.456	0.491	4.311	3.834	PASS	PASS
2_13052	Cowpea_IT97K-499-35_v1.0	Vu01	39641491	[A/C]	SNP	0.395	0.329	0.332	3.834	PASS	PASS
2_52918	Cowpea_IT97K-499-35_v1.0	Vu01	39701980	[C/G]	SNP	0.306	0.272	8.99	3.834	PASS	PASS
2_33967	Cowpea_IT97K-499-35_v1.0	Vu01	39827724	[A/T]	SNP	0.158	0.293	0.553	3.834	PASS	PASS
2_26787	Cowpea_IT97K-499-35_v1.0	Vu01	39889890	[T/C]	SNP	0.268	0.155	0.295	3.834	PASS	PASS
2_08014	Cowpea_IT97K-499-35_v1.0	Vu01	39968922	[G/A]	SNP	0.323	0.217	0.111	3.834	PASS	PASS
2_55167	Cowpea_IT97K-499-35_v1.0	Vu01	40044576	[T/C]	SNP	0.338	0.421	2.248	3.834	PASS	PASS
2_27610	Cowpea_IT97K-499-35_v1.0	Vu01	40175097	[T/C]	SNP	0.431	0.394	0.553	3.834	PASS	PASS
2_03329	Cowpea_IT97K-499-35_v1.0	Vu01	40234798	[A/C]	SNP	0.316	0.359	0.442	3.834	PASS	PASS
2_10390	Cowpea_IT97K-499-35_v1.0	Vu01	40295169	[A/G]	SNP	0.475	0.486	0.405	3.834	PASS	PASS
2_30949	Cowpea_IT97K-499-35_v1.0	Vu01	40370314	[A/G]	SNP	0.489	0.443	0.258	3.834	PASS	PASS
2_51826	Cowpea_IT97K-499-35_v1.0	Vu01	40432857	[A/G]	SNP	0.213	0.26	0.405	3.834	PASS	PASS
2_26815	Cowpea_IT97K-499-35_v1.0	Vu01	40753563	[A/G]	SNP	0.492	0.418	0.221	3.834	PASS	PASS
2_07925	Cowpea_IT97K-499-35_v1.0	Vu01	41043865	[A/C]	SNP	0.233	0.253	0.074	3.834	PASS	PASS
2_28792	Cowpea_IT97K-499-35_v1.0	Vu01	41184607	[G/A]	SNP	0.248	0.362	1.842	3.834	PASS	PASS
2_30660	Cowpea_IT97K-499-35_v1.0	Vu01	41245116	[G/A]	SNP	0.208	0.307	0.479	3.834	PASS	PASS
2_48787	Cowpea_IT97K-499-35_v1.0	Vu01	41316959	[C/T]	SNP	0.25	0.253	1.621	3.834	PASS	PASS
2_18661	Cowpea_IT97K-499-35_v1.0	Vu01	41406675	[C/T]	SNP	0.281	0.329	0.258	3.834	PASS	PASS
2_27458	Cowpea_IT97K-499-35_v1.0	Vu01	41466678	[T/C]	SNP	0.445	0.366	0.811	3.834	PASS	PASS
2_16197	Cowpea_IT97K-499-35_v1.0	Vu01	41534738	[G/A]	SNP	0.266	0.243	0.147	3.834	PASS	PASS
2_09412	Cowpea_IT97K-499-35_v1.0	Vu01	41613048	[A/G]	SNP	0.481	0.413	0.258	3.834	PASS	PASS
2_20576	Cowpea_IT97K-499-35_v1.0	Vu01	41751973	[T/C]	SNP	0.254	0.177	0.147	3.834	PASS	PASS
2_12726	Cowpea_IT97K-499-35_v1.0	Vu01	41822069	[A/G]	SNP	0.297	0.364	0.111	3.834	PASS	PASS
2_46727	Cowpea_IT97K-499-35_v1.0	Vu01	41891608	[C/T]	SNP	0.479	0.445	0.553	3.834	PASS	PASS
2_22122	Cowpea_IT97K-499-35_v1.0	Vu01	41951696	[T/G]	SNP	0.434	0.497	0.258	3.834	PASS	PASS
2_18524	Cowpea_IT97K-499-35_v1.0	Vu01	42014104	[A/C]	SNP	0.282	0.307	0.147	3.834	PASS	PASS
2_51001	Cowpea_IT97K-499-35_v1.0	Vu02	71029	[A/G]	SNP	0.492	0.386	0.811	0.217	PASS	PASS
2_42239	Cowpea_IT97K-499-35_v1.0	Vu02	616862	[G/A]	SNP	0.464	0.421	3.39	0.217	PASS	PASS
2_33240	Cowpea_IT97K-499-35_v1.0	Vu02	1163473	[T/A]	SNP	0.425	0.486	0.111	0.217	PASS	PASS
2_41490	Cowpea_IT97K-499-35_v1.0	Vu02	1695040	[T/G]	SNP	0.43	0.492	0.59	0.217	PASS	PASS
2_37889	Cowpea_IT97K-499-35_v1.0	Vu02	2185169	[A/G]	SNP	0.434	0.476	0.258	0.234	PASS	PASS
2_41390	Cowpea_IT97K-499-35_v1.0	Vu02	2597789	[C/T]	SNP	0.442	0.497	1.032	0.288	PASS	PASS
2_24834	Cowpea_IT97K-499-35_v1.0	Vu02	2675913	[G/A]	SNP	0.442	0.495	0.737	0.301	PASS	PASS
2_51291	Cowpea_IT97K-499-35_v1.0	Vu02	3107329	[G/A]	SNP	0.481	0.424	3.242	0.377	PASS	PASS
2_04561	Cowpea_IT97K-499-35_v1.0	Vu02	3466867	[C/A]	SNP	0.44	0.5	0.368	0.44	PASS	PASS
2_33844	Cowpea_IT97K-499-35_v1.0	Vu02	3822811	[A/T]	SNP	0.471	0.429	0.442	0.498	PASS	PASS
2_13417	Cowpea_IT97K-499-35_v1.0	Vu02	4139098	[G/T]	SNP	0.23	0.269	0.295	0.542	PASS	PASS
2_25578	Cowpea_IT97K-499-35_v1.0	Vu02	4405200	[A/G]	SNP	0.249	0.285	0.332	0.572	PASS	PASS
2_45464	Cowpea_IT97K-499-35_v1.0	Vu02	4674268	[T/A]	SNP	0.27	0.262	0.958	0.595	PASS	PASS
2_38286	Cowpea_IT97K-499-35_v1.0	Vu02	5628471	[G/A]	SNP	0.468	0.464	1.769	0.624	PASS	PASS
2_48981	Cowpea_IT97K-499-35_v1.0	Vu02	6115286	[C/T]	SNP	0.445	0.489	0.405	0.61	PASS	PASS
2_46961	Cowpea_IT97K-499-35_v1.0	Vu02	6381925	[T/C]	SNP	0.42	0.488	7.996	0.595	PASS	PASS
2_41387	Cowpea_IT97K-499-35_v1.0	Vu02	6652421	[A/G]	SNP	0.436	0.466	5.158	0.576	PASS	PASS
2_54314	Cowpea_IT97K-499-35_v1.0	Vu02	6931617	[G/A]	SNP	0.47	0.429	0.479	0.553	PASS	PASS
2_40074	Cowpea_IT97K-499-35_v1.0	Vu02	7231758	[C/T]	SNP	0.382	0.462	0.811	0.525	PASS	PASS
2_07397	Cowpea_IT97K-499-35_v1.0	Vu02	7736661	[C/T]	SNP	0.406	0.459	0.184	0.474	PASS	PASS
2_51601	Cowpea_IT97K-499-35_v1.0	Vu02	8301078	[C/T]	SNP	0.451	0.476	0.59	0.415	PASS	PASS
2_46016	Cowpea_IT97K-499-35_v1.0	Vu02	9267797	[C/A]	SNP	0.446	0.47	0.442	0.323	PASS	PASS
2_32674	Cowpea_IT97K-499-35_v1.0	Vu02	9888425	[T/A]	SNP	0.287	0.285	0.221	0.279	PASS	PASS
2_24252	Cowpea_IT97K-499-35_v1.0	Vu02	11475722	[C/A]	SNP	0.267	0.236	0.184	0.247	PASS	PASS
2_41906	Cowpea_IT97K-499-35_v1.0	Vu02	12174548	[T/C]	SNP	0.31	0.291	0.553	0.277	PASS	PASS
2_42229	Cowpea_IT97K-499-35_v1.0	Vu02	12748462	[A/G]	SNP	0.314	0.253	0.368	0.325	PASS	PASS
2_49593	Cowpea_IT97K-499-35_v1.0	Vu02	13163476	[G/A]	SNP	0.303	0.226	0.442	0.372	PASS	PASS
2_50734	Cowpea_IT97K-499-35_v1.0	Vu02	13616310	[T/C]	SNP	0.102	0.253	0.368	0.436	PASS	PASS
2_47063	Cowpea_IT97K-499-35_v1.0	Vu02	13947836	[T/C]	SNP	0.474	0.396	5.38	0.49	PASS	PASS
2_38275	Cowpea_IT97K-499-35_v1.0	Vu02	14644220	[T/C]	SNP	0.435	0.38	0.516	0.625	PASS	PASS
2_49572	Cowpea_IT97K-499-35_v1.0	Vu02	15074775	[T/C]	SNP	0.48	0.369	0.737	0.722	PASS	PASS
2_06171	Cowpea_IT97K-499-35_v1.0	Vu02	15422042	[T/C]	SNP	0.398	0.334	0.111	0.808	PASS	PASS
2_48274	Cowpea_IT97K-499-35_v1.0	Vu02	15616162	[T/C]	SNP	0.32	0.294	2.69	0.858	PASS	PASS
2_44123	Cowpea_IT97K-499-35_v1.0	Vu02	16075877	[G/A]	SNP	0.273	0.311	0.553	0.984	PASS	PASS
2_41022	Cowpea_IT97K-499-35_v1.0	Vu02	16298542	[T/C]	SNP	0.166	0.304	0.516	1.048	PASS	PASS
2_09561	Cowpea_IT97K-499-35_v1.0	Vu02	16522481	[G/T]	SNP	0.173	0.34	0.074	1.114	PASS	PASS
2_31613	Cowpea_IT97K-499-35_v1.0	Vu02	16717934	[T/C]	SNP	0.239	0.364	0.332	1.173	PASS	PASS
2_51655	Cowpea_IT97K-499-35_v1.0	Vu02	16930057	[A/C]	SNP	0.282	0.341	2.469	1.239	PASS	PASS
2_50070	Cowpea_IT97K-499-35_v1.0	Vu02	17132019	[A/G]	SNP	0.406	0.318	0.516	1.302	PASS	PASS
2_17636	Cowpea_IT97K-499-35_v1.0	Vu02	17300513	[T/C]	SNP	0.336	0.462	0.221	1.356	PASS	PASS
2_47569	Cowpea_IT97K-499-35_v1.0	Vu02	17467143	[T/C]	SNP	0.437	0.432	0.479	1.41	PASS	PASS
2_52328	Cowpea_IT97K-499-35_v1.0	Vu02	17629965	[T/C]	SNP	0.499	0.454	0.368	1.464	PASS	PASS
2_26229	Cowpea_IT97K-499-35_v1.0	Vu02	17787682	[A/G]	SNP	0.257	0.217	0.332	1.516	PASS	PASS
2_09710	Cowpea_IT97K-499-35_v1.0	Vu02	17947551	[T/G]	SNP	0.298	0.207	0.368	1.569	PASS	PASS
2_42127	Cowpea_IT97K-499-35_v1.0	Vu02	18101643	[T/C]	SNP	0.361	0.22	0.663	1.621	PASS	PASS
2_07215	Cowpea_IT97K-499-35_v1.0	Vu02	18278537	[T/G]	SNP	0.489	0.37	0.258	1.681	PASS	PASS
2_40597	Cowpea_IT97K-499-35_v1.0	Vu02	18472087	[A/G]	SNP	0.312	0.273	2.432	1.746	PASS	PASS
2_09180	Cowpea_IT97K-499-35_v1.0	Vu02	18616172	[G/A]	SNP	0.484	0.383	0.037	1.795	PASS	PASS
2_46046	Cowpea_IT97K-499-35_v1.0	Vu02	18750431	[T/C]	SNP	0.318	0.221	8.254	1.841	PASS	PASS
2_41294	Cowpea_IT97K-499-35_v1.0	Vu02	18884823	[C/A]	SNP	0.303	0.224	1.142	1.887	PASS	PASS
2_25996	Cowpea_IT97K-499-35_v1.0	Vu02	19058275	[A/G]	SNP	0.268	0.249	3.758	1.946	PASS	PASS
2_27990	Cowpea_IT97K-499-35_v1.0	Vu02	19176857	[A/G]	SNP	0.308	0.306	0.368	1.986	PASS	PASS
2_34526	Cowpea_IT97K-499-35_v1.0	Vu02	19429954	[A/T]	SNP	0.338	0.279	0.258	2.072	PASS	PASS
2_08139	Cowpea_IT97K-499-35_v1.0	Vu02	19544417	[G/A]	SNP	0.262	0.196	0.295	2.11	PASS	PASS
2_54202	Cowpea_IT97K-499-35_v1.0	Vu02	19696165	[C/T]	SNP	0.215	0.251	0.663	2.161	PASS	PASS
2_50449	Cowpea_IT97K-499-35_v1.0	Vu02	19813544	[T/C]	SNP	0.28	0.217	0.368	2.201	PASS	PASS
2_45934	Cowpea_IT97K-499-35_v1.0	Vu02	19916333	[G/C]	SNP	0.342	0.234	0.516	2.235	PASS	PASS
2_51666	Cowpea_IT97K-499-35_v1.0	Vu02	20017176	[T/C]	SNP	0.402	0.423	0.663	2.268	PASS	PASS
2_10717	Cowpea_IT97K-499-35_v1.0	Vu02	20280211	[A/G]	SNP	0.317	0.293	0.147	2.354	PASS	PASS
2_49341	Cowpea_IT97K-499-35_v1.0	Vu02	20409036	[C/T]	SNP	0.284	0.238	0.921	2.396	PASS	PASS
2_20486	Cowpea_IT97K-499-35_v1.0	Vu02	20594770	[T/C]	SNP	0.201	0.264	0.258	2.456	PASS	PASS
2_10972	Cowpea_IT97K-499-35_v1.0	Vu02	20711314	[A/G]	SNP	0.356	0.402	0.516	2.493	PASS	PASS
2_03273	Cowpea_IT97K-499-35_v1.0	Vu02	20815546	[G/T]	SNP	0.168	0.311	0.258	2.526	PASS	PASS
2_46397	Cowpea_IT97K-499-35_v1.0	Vu02	20951084	[A/G]	SNP	0.39	0.348	0.479	2.569	PASS	PASS
2_44373	Cowpea_IT97K-499-35_v1.0	Vu02	21042540	[T/C]	SNP	0.268	0.158	0.663	2.597	PASS	PASS
2_49667	Cowpea_IT97K-499-35_v1.0	Vu02	21145273	[T/C]	SNP	0.255	0.232	1.511	2.629	PASS	PASS
2_28659	Cowpea_IT97K-499-35_v1.0	Vu02	21312681	[G/T]	SNP	0.271	0.273	0.111	2.68	PASS	PASS
2_32062	Cowpea_IT97K-499-35_v1.0	Vu02	21405518	[C/T]	SNP	0.431	0.399	0.295	2.708	PASS	PASS
2_26493	Cowpea_IT97K-499-35_v1.0	Vu02	21553924	[T/C]	SNP	0.248	0.26	1.805	2.752	PASS	PASS
1_0529	Cowpea_IT97K-499-35_v1.0	Vu02	21770193	[T/C]	SNP	0.195	0.258	3.132	2.816	PASS	PASS
2_48183	Cowpea_IT97K-499-35_v1.0	Vu02	21979505	[A/T]	SNP	0.304	0.258	0.405	2.876	PASS	PASS
2_12370	Cowpea_IT97K-499-35_v1.0	Vu02	22083279	[C/T]	SNP	0.422	0.413	0.368	2.905	PASS	PASS
2_55230	Cowpea_IT97K-499-35_v1.0	Vu02	22191748	[A/G]	SNP	0.327	0.364	0.479	2.936	PASS	PASS
2_25478	Cowpea_IT97K-499-35_v1.0	Vu02	22380373	[T/G]	SNP	0.304	0.309	0.626	2.988	PASS	PASS
2_11274	Cowpea_IT97K-499-35_v1.0	Vu02	22590056	[C/T]	SNP	0.365	0.394	0.221	3.045	PASS	PASS
2_26918	Cowpea_IT97K-499-35_v1.0	Vu02	22666272	[G/A]	SNP	0.406	0.367	0.811	3.066	PASS	PASS
2_14251	Cowpea_IT97K-499-35_v1.0	Vu02	22760661	[T/C]	SNP	0.489	0.465	0.037	3.091	PASS	PASS
2_09125	Cowpea_IT97K-499-35_v1.0	Vu02	22835196	[T/C]	SNP	0.177	0.266	0.037	3.111	PASS	PASS
2_21348	Cowpea_IT97K-499-35_v1.0	Vu02	22918902	[A/G]	SNP	0.467	0.454	0.295	3.133	PASS	PASS
2_17568	Cowpea_IT97K-499-35_v1.0	Vu02	22997401	[C/T]	SNP	0.382	0.464	0.295	3.153	PASS	PASS
2_29909	Cowpea_IT97K-499-35_v1.0	Vu02	23075389	[C/T]	SNP	0.236	0.351	0.7	3.173	PASS	PASS
2_38736	Cowpea_IT97K-499-35_v1.0	Vu02	23211299	[C/T]	SNP	0.48	0.489	0.7	3.208	PASS	PASS
2_01793	Cowpea_IT97K-499-35_v1.0	Vu02	23287110	[G/A]	SNP	0.47	0.25	0.147	3.227	PASS	PASS
2_12344	Cowpea_IT97K-499-35_v1.0	Vu02	23371167	[T/C]	SNP	0.393	0.332	0.332	3.249	PASS	PASS
2_14306	Cowpea_IT97K-499-35_v1.0	Vu02	23442428	[A/G]	SNP	0.407	0.399	0.221	3.267	PASS	PASS
2_08576	Cowpea_IT97K-499-35_v1.0	Vu02	23527282	[T/C]	SNP	0.161	0.291	0.258	3.288	PASS	PASS
2_51270	Cowpea_IT97K-499-35_v1.0	Vu02	23596882	[A/G]	SNP	0.459	0.457	0.553	3.305	PASS	PASS
2_05985	Cowpea_IT97K-499-35_v1.0	Vu02	23668109	[A/G]	SNP	0.237	0.337	0.295	3.323	PASS	PASS
2_49938	Cowpea_IT97K-499-35_v1.0	Vu02	23746346	[G/A]	SNP	0.366	0.397	0.442	3.342	PASS	PASS
2_46934	Cowpea_IT97K-499-35_v1.0	Vu02	23815150	[T/G]	SNP	0.323	0.247	0.7	3.359	PASS	PASS
2_28722	Cowpea_IT97K-499-35_v1.0	Vu02	23982839	[T/G]	SNP	0.21	0.332	0.074	3.399	PASS	PASS
2_19128	Cowpea_IT97K-499-35_v1.0	Vu02	24050129	[T/G]	SNP	0.275	0.38	0.258	3.416	PASS	PASS
2_20063	Cowpea_IT97K-499-35_v1.0	Vu02	24124700	[G/A]	SNP	0.24	0.347	0.553	3.434	PASS	PASS
2_01410	Cowpea_IT97K-499-35_v1.0	Vu02	24217747	[A/G]	SNP	0.283	0.193	0.295	3.456	PASS	PASS
2_26453	Cowpea_IT97K-499-35_v1.0	Vu02	24288053	[T/C]	SNP	0.44	0.432	0.332	3.473	PASS	PASS
2_30996	Cowpea_IT97K-499-35_v1.0	Vu02	24353437	[A/G]	SNP	0.274	0.421	0.332	3.488	PASS	PASS
2_10892	Cowpea_IT97K-499-35_v1.0	Vu02	24460735	[C/T]	SNP	0.308	0.247	0.479	3.514	PASS	PASS
2_15706	Cowpea_IT97K-499-35_v1.0	Vu02	24541062	[T/C]	SNP	0.265	0.231	0.516	3.533	PASS	PASS
2_17205	Cowpea_IT97K-499-35_v1.0	Vu02	24707907	[C/T]	SNP	0.186	0.269	1.105	3.572	PASS	PASS
2_05664	Cowpea_IT97K-499-35_v1.0	Vu02	24804255	[A/C]	SNP	0.473	0.448	0.295	3.595	PASS	PASS
2_02018	Cowpea_IT97K-499-35_v1.0	Vu02	24871710	[C/T]	SNP	0.49	0.435	0.258	3.611	PASS	PASS
2_49372	Cowpea_IT97K-499-35_v1.0	Vu02	24944602	[A/C]	SNP	0.495	0.394	0.516	3.628	PASS	PASS
2_23396	Cowpea_IT97K-499-35_v1.0	Vu02	25015048	[C/T]	SNP	0.289	0.476	0.295	3.644	PASS	PASS
2_21967	Cowpea_IT97K-499-35_v1.0	Vu02	25088641	[G/A]	SNP	0.195	0.291	0.147	3.661	PASS	PASS
2_01251	Cowpea_IT97K-499-35_v1.0	Vu02	25151912	[C/T]	SNP	0.452	0.424	0.037	3.676	PASS	PASS
2_25812	Cowpea_IT97K-499-35_v1.0	Vu02	25217536	[C/T]	SNP	0.388	0.481	3.721	3.691	PASS	PASS
2_21095	Cowpea_IT97K-499-35_v1.0	Vu02	25282821	[C/T]	SNP	0.397	0.451	0.332	3.707	PASS	PASS
2_07494	Cowpea_IT97K-499-35_v1.0	Vu02	25349677	[T/G]	SNP	0.242	0.367	0.147	3.722	PASS	PASS
2_22939	Cowpea_IT97K-499-35_v1.0	Vu02	25410921	[C/T]	SNP	0.338	0.467	0.295	3.737	PASS	PASS
2_21119	Cowpea_IT97K-499-35_v1.0	Vu02	25476630	[A/G]	SNP	0.497	0.326	0.221	3.752	PASS	PASS
2_01739	Cowpea_IT97K-499-35_v1.0	Vu02	25539550	[T/G]	SNP	0.296	0.465	1.069	3.767	PASS	PASS
2_01445	Cowpea_IT97K-499-35_v1.0	Vu02	25617589	[A/G]	SNP	0.347	0.429	0.295	3.785	PASS	PASS
2_07943	Cowpea_IT97K-499-35_v1.0	Vu02	25688371	[A/G]	SNP	0.469	0.337	0.184	3.802	PASS	PASS
2_14961	Cowpea_IT97K-499-35_v1.0	Vu02	25760875	[A/G]	SNP	0.292	0.359	0.221	3.819	PASS	PASS
2_44754	Cowpea_IT97K-499-35_v1.0	Vu02	25836618	[A/G]	SNP	0.424	0.453	0.59	3.836	PASS	PASS
2_40198	Cowpea_IT97K-499-35_v1.0	Vu02	25898601	[G/A]	SNP	0.13	0.25	0.368	3.851	PASS	PASS
2_06090	Cowpea_IT97K-499-35_v1.0	Vu02	25962573	[A/G]	SNP	0.401	0.353	0.111	3.866	PASS	PASS
2_54052	Cowpea_IT97K-499-35_v1.0	Vu02	26030783	[T/C]	SNP	0.248	0.402	0.405	3.882	PASS	PASS
2_08131	Cowpea_IT97K-499-35_v1.0	Vu02	26100558	[C/A]	SNP	0.349	0.435	0.147	3.899	PASS	PASS
2_53023	Cowpea_IT97K-499-35_v1.0	Vu02	26159088	[G/T]	SNP	0.314	0.304	0.221	3.912	PASS	PASS
2_46889	Cowpea_IT97K-499-35_v1.0	Vu02	26218230	[T/C]	SNP	0.332	0.205	1.769	3.926	PASS	PASS
2_05386	Cowpea_IT97K-499-35_v1.0	Vu02	26390505	[T/C]	SNP	0.36	0.307	0.074	3.967	PASS	PASS
2_47676	Cowpea_IT97K-499-35_v1.0	Vu02	26457263	[C/T]	SNP	0.306	0.231	0.847	3.983	PASS	PASS
2_41958	Cowpea_IT97K-499-35_v1.0	Vu02	26542562	[C/T]	SNP	0.462	0.313	0.7	4.003	PASS	PASS
2_23419	Cowpea_IT97K-499-35_v1.0	Vu02	26604203	[C/T]	SNP	0.396	0.345	0.184	4.018	PASS	PASS
2_29689	Cowpea_IT97K-499-35_v1.0	Vu02	26668119	[A/G]	SNP	0.351	0.272	0.184	4.033	PASS	PASS
2_24302	Cowpea_IT97K-499-35_v1.0	Vu02	26725928	[A/C]	SNP	0.362	0.277	0.184	4.047	PASS	PASS
2_24139	Cowpea_IT97K-499-35_v1.0	Vu02	26795002	[C/T]	SNP	0.282	0.182	0.037	4.063	PASS	PASS
2_29071	Cowpea_IT97K-499-35_v1.0	Vu02	26925711	[C/A]	SNP	0.362	0.356	1.4	4.095	PASS	PASS
2_10729	Cowpea_IT97K-499-35_v1.0	Vu02	26988300	[C/T]	SNP	0.297	0.177	0.368	4.11	PASS	PASS
1_0477	Cowpea_IT97K-499-35_v1.0	Vu02	27044282	[G/T]	SNP	0.348	0.264	0.184	4.123	PASS	PASS
2_12138	Cowpea_IT97K-499-35_v1.0	Vu02	27100525	[T/C]	SNP	0.292	0.274	0.258	4.136	PASS	PASS
2_03868	Cowpea_IT97K-499-35_v1.0	Vu02	27158979	[T/C]	SNP	0.284	0.212	0.074	4.15	PASS	PASS
2_27668	Cowpea_IT97K-499-35_v1.0	Vu02	27242260	[C/T]	SNP	0.325	0.269	0.368	4.17	PASS	PASS
2_16539	Cowpea_IT97K-499-35_v1.0	Vu02	27311760	[G/A]	SNP	0.257	0.204	0.111	4.187	PASS	PASS
2_45669	Cowpea_IT97K-499-35_v1.0	Vu02	27368595	[T/C]	SNP	0.187	0.383	0.332	4.2	PASS	PASS
2_55478	Cowpea_IT97K-499-35_v1.0	Vu02	27453441	[T/C]	SNP	0.412	0.317	0.59	4.22	PASS	PASS
2_54989	Cowpea_IT97K-499-35_v1.0	Vu02	27514585	[A/C]	SNP	0.407	0.435	0.295	4.235	PASS	PASS
2_04643	Cowpea_IT97K-499-35_v1.0	Vu02	27579115	[T/C]	SNP	0.456	0.497	0.184	4.25	PASS	PASS
2_21931	Cowpea_IT97K-499-35_v1.0	Vu02	27647351	[C/T]	SNP	0.347	0.231	0	4.266	PASS	PASS
2_01421	Cowpea_IT97K-499-35_v1.0	Vu02	27722407	[G/A]	SNP	0.381	0.307	0.147	4.284	PASS	PASS
2_50380	Cowpea_IT97K-499-35_v1.0	Vu02	27776751	[C/T]	SNP	0.342	0.315	0.332	4.296	PASS	PASS
2_02369	Cowpea_IT97K-499-35_v1.0	Vu02	27876382	[T/C]	SNP	0.365	0.486	0.184	4.319	PASS	PASS
2_05689	Cowpea_IT97K-499-35_v1.0	Vu02	28042101	[A/G]	SNP	0.251	0.25	0.221	4.357	PASS	PASS
2_07983	Cowpea_IT97K-499-35_v1.0	Vu02	28107966	[A/G]	SNP	0.378	0.38	0.442	4.372	PASS	PASS
2_53712	Cowpea_IT97K-499-35_v1.0	Vu02	28165060	[A/C]	SNP	0.332	0.345	0.479	4.385	PASS	PASS
2_00124	Cowpea_IT97K-499-35_v1.0	Vu02	28222726	[C/T]	SNP	0.44	0.394	0.037	4.398	PASS	PASS
2_01419	Cowpea_IT97K-499-35_v1.0	Vu02	28276774	[T/C]	SNP	0.379	0.462	0.405	4.41	PASS	PASS
2_28493	Cowpea_IT97K-499-35_v1.0	Vu02	28335455	[A/G]	SNP	0.305	0.47	0.295	4.423	PASS	PASS
2_15427	Cowpea_IT97K-499-35_v1.0	Vu02	28420867	[A/G]	SNP	0.29	0.462	0.221	4.441	PASS	PASS
2_18332	Cowpea_IT97K-499-35_v1.0	Vu02	28524704	[A/C]	SNP	0.266	0.226	0.553	4.463	PASS	PASS
2_32555	Cowpea_IT97K-499-35_v1.0	Vu02	28604864	[C/G]	SNP	0.309	0.174	0.184	4.48	PASS	PASS
2_08625	Cowpea_IT97K-499-35_v1.0	Vu02	28707688	[A/G]	SNP	0.219	0.358	0.111	4.501	PASS	PASS
2_21508	Cowpea_IT97K-499-35_v1.0	Vu02	28765573	[C/T]	SNP	0.23	0.369	0.368	4.512	PASS	PASS
2_30295	Cowpea_IT97K-499-35_v1.0	Vu02	28913569	[C/T]	SNP	0.471	0.424	0.737	4.541	PASS	PASS
2_22804	Cowpea_IT97K-499-35_v1.0	Vu02	28979035	[T/C]	SNP	0.147	0.286	9.138	4.553	PASS	PASS
2_19976	Cowpea_IT97K-499-35_v1.0	Vu02	29190048	[T/G]	SNP	0.167	0.205	0.332	4.59		PASS
2_01053	Cowpea_IT97K-499-35_v1.0	Vu02	29395026	[C/T]	SNP	0.291	0.331	0.7	4.623	PASS	PASS
2_08763	Cowpea_IT97K-499-35_v1.0	Vu02	29458049	[G/A]	SNP	0.214	0.269	0.074	4.632	PASS	PASS
2_28279	Cowpea_IT97K-499-35_v1.0	Vu02	29524872	[T/G]	SNP	0.317	0.361	0.7	4.642	PASS	PASS
2_31029	Cowpea_IT97K-499-35_v1.0	Vu02	29597708	[G/A]	SNP	0.279	0.188	0.442	4.652	PASS	PASS
2_19776	Cowpea_IT97K-499-35_v1.0	Vu02	29646653	[C/T]	SNP	0.322	0.334	0.405	4.658	PASS	PASS
2_13918	Cowpea_IT97K-499-35_v1.0	Vu02	29699137	[T/G]	SNP	0.454	0.41	0.184	4.664	PASS	PASS
2_10146	Cowpea_IT97K-499-35_v1.0	Vu02	29895751	[G/T]	SNP	0.244	0.255	0.184	4.685	PASS	PASS
2_11694	Cowpea_IT97K-499-35_v1.0	Vu02	29987123	[A/G]	SNP	0.292	0.27	0.442	4.693	PASS	PASS
2_00224	Cowpea_IT97K-499-35_v1.0	Vu02	30035803	[T/C]	SNP	0.485	0.432	0.295	4.697	PASS	PASS
2_20922	Cowpea_IT97K-499-35_v1.0	Vu02	30093533	[A/G]	SNP	0.486	0.364	0.184	4.701	PASS	PASS
2_27704	Cowpea_IT97K-499-35_v1.0	Vu02	30367253	[T/C]	SNP	0.47	0.304	0.516	4.714	PASS	PASS
2_07091	Cowpea_IT97K-499-35_v1.0	Vu02	30417752	[G/A]	SNP	0.479	0.329	0.368	4.715	PASS	PASS
2_27135	Cowpea_IT97K-499-35_v1.0	Vu02	30480559	[C/A]	SNP	0.467	0.285	0.332	4.716	PASS	PASS
2_50831	Cowpea_IT97K-499-35_v1.0	Vu02	30530453	[T/C]	SNP	0.475	0.402	0.221	4.716	PASS	PASS
2_34649	Cowpea_IT97K-499-35_v1.0	Vu02	30594048	[T/A]	SNP	0.324	0.429	0.59	4.716	PASS	PASS
2_27443	Cowpea_IT97K-499-35_v1.0	Vu02	30644044	[A/G]	SNP	0.442	0.386	0.184	4.715	PASS	PASS
2_24024	Cowpea_IT97K-499-35_v1.0	Vu02	30709133	[C/A]	SNP	0.449	0.391	0.221	4.713	PASS	PASS
2_12113	Cowpea_IT97K-499-35_v1.0	Vu02	30831777	[A/G]	SNP	0.356	0.484	0.111	4.707	PASS	PASS
2_30046	Cowpea_IT97K-499-35_v1.0	Vu02	31124618	[A/C]	SNP	0.344	0.342	0.221	4.682	PASS	PASS
2_12730	Cowpea_IT97K-499-35_v1.0	Vu02	31258340	[C/T]	SNP	0.112	0.255	0.553	4.664	PASS	PASS
2_19482	Cowpea_IT97K-499-35_v1.0	Vu02	31309111	[C/A]	SNP	0.144	0.319	0.553	4.657	PASS	PASS
2_33041	Cowpea_IT97K-499-35_v1.0	Vu02	31541062	[A/T]	SNP	0.463	0.459	0.479	4.614	PASS	PASS
2_09503	Cowpea_IT97K-499-35_v1.0	Vu02	31605165	[G/A]	SNP	0.375	0.215	0.221	4.601	PASS	PASS
2_29640	Cowpea_IT97K-499-35_v1.0	Vu02	31669288	[A/G]	SNP	0.414	0.315	0.847	4.586	PASS	PASS
2_27280	Cowpea_IT97K-499-35_v1.0	Vu02	31721826	[G/A]	SNP	0.267	0.458	0.811	4.573	PASS	PASS
2_34379	Cowpea_IT97K-499-35_v1.0	Vu02	31786299	[A/T]	SNP	0.223	0.405	0.368	4.556	PASS	PASS
2_33528	Cowpea_IT97K-499-35_v1.0	Vu02	31846716	[C/G]	SNP	0.223	0.405	0.368	4.54	PASS	PASS
2_02497	Cowpea_IT97K-499-35_v1.0	Vu02	31915395	[A/G]	SNP	0.35	0.315	0.295	4.52	PASS	PASS
2_16174	Cowpea_IT97K-499-35_v1.0	Vu02	31978570	[C/A]	SNP	0.241	0.299	0.074	4.501	PASS	PASS
2_20526	Cowpea_IT97K-499-35_v1.0	Vu02	32096983	[C/T]	SNP	0.199	0.253	0.258	4.462	PASS	PASS
2_46787	Cowpea_IT97K-499-35_v1.0	Vu02	32174654	[C/T]	SNP	0.478	0.424	0.442	4.435	PASS	PASS
2_11444	Cowpea_IT97K-499-35_v1.0	Vu02	32487131	[T/G]	SNP	0.329	0.261	0.479	4.313	PASS	PASS
2_44960	Cowpea_IT97K-499-35_v1.0	Vu02	32628247	[T/C]	SNP	0.212	0.286	1.437	4.25	PASS	PASS
2_20461	Cowpea_IT97K-499-35_v1.0	Vu02	32688594	[A/G]	SNP	0.282	0.446	0.295	4.223	PASS	PASS
2_12894	Cowpea_IT97K-499-35_v1.0	Vu02	32745311	[C/T]	SNP	0.457	0.443	0.111	4.196	PASS	PASS
2_11019	Cowpea_IT97K-499-35_v1.0	Vu02	32801405	[A/C]	SNP	0.358	0.272	0.479	4.168	PASS	PASS
2_29985	Cowpea_IT97K-499-35_v1.0	Vu02	32859779	[G/A]	SNP	0.355	0.306	0.479	4.14	PASS	PASS
2_03328	Cowpea_IT97K-499-35_v1.0	Vu02	32921491	[T/C]	SNP	0.151	0.274	0.332	4.108	PASS	PASS
2_11291	Cowpea_IT97K-499-35_v1.0	Vu02	32986839	[C/T]	SNP	0.276	0.242	0.258	4.075	PASS	PASS
2_13496	Cowpea_IT97K-499-35_v1.0	Vu02	33048790	[T/G]	SNP	0.321	0.399	0.332	4.042	PASS	PASS
2_10955	Cowpea_IT97K-499-35_v1.0	Vu02	33182973	[G/A]	SNP	0.417	0.379	0.295	3.969	PASS	PASS
2_47724	Cowpea_IT97K-499-35_v1.0	Vu02	33249109	[T/G]	SNP	0.277	0.323	0.221	3.933	PASS	PASS
2_32209	Cowpea_IT97K-499-35_v1.0	Vu02	33314989	[A/G]	SNP	0.352	0.478	0.332	3.896	PASS	PASS
2_17380	Cowpea_IT97K-499-35_v1.0	Vu02	33393370	[G/A]	SNP	0.358	0.378	0.074	3.852	PASS	PASS
1_0016	Cowpea_IT97K-499-35_v1.0	Vu02	33602426	[C/A]	SNP	0.4	0.336	0.111	3.774	PASS	PASS
2_25919	Cowpea_IT97K-499-35_v1.0	Vu02	33662930	[T/G]	SNP	0.486	0.484	0.7	3.774	PASS	PASS
2_12454	Cowpea_IT97K-499-35_v1.0	Vu02	33745003	[C/T]	SNP	0.297	0.372	0.405	3.774	PASS	PASS
2_28987	Cowpea_IT97K-499-35_v1.0	Vu02	33817793	[G/T]	SNP	0.297	0.372	0.332	3.774	PASS	PASS
2_04901	Cowpea_IT97K-499-35_v1.0	Vu03	131118	[C/T]	SNP	0.081	0.092	0.111	6.325		FAIL
2_11159	Cowpea_IT97K-499-35_v1.0	Vu03	255395	[C/A]	SNP	0.335	0.443	0.111	6.325	PASS	PASS
2_26843	Cowpea_IT97K-499-35_v1.0	Vu03	301043	[T/C]	SNP	0.181	0.254	0.184	6.325	PASS	PASS
2_11823	Cowpea_IT97K-499-35_v1.0	Vu03	354969	[T/C]	SNP	0.278	0.101	0.442	6.325	PASS	PASS
2_04773	Cowpea_IT97K-499-35_v1.0	Vu03	400985	[C/T]	SNP	0.495	0.377	1.363	6.325	PASS	PASS
2_53838	Cowpea_IT97K-499-35_v1.0	Vu03	439114	[C/A]	SNP	0.454	0.44	0.737	6.294	PASS	PASS
2_22754	Cowpea_IT97K-499-35_v1.0	Vu03	477807	[A/G]	SNP	0.357	0.438	0.074	6.263	PASS	PASS
2_01999	Cowpea_IT97K-499-35_v1.0	Vu03	573087	[G/A]	SNP	0.496	0.473	0.074	6.186	PASS	PASS
1_0080	Cowpea_IT97K-499-35_v1.0	Vu03	631312	[T/C]	SNP	0.137	0.27	1.032	6.14	PASS	PASS
2_02694	Cowpea_IT97K-499-35_v1.0	Vu03	695682	[A/G]	SNP	0.491	0.483	7.296	6.089	PASS	PASS
2_00783	Cowpea_IT97K-499-35_v1.0	Vu03	736307	[A/G]	SNP	0.292	0.272	0.368	6.057	PASS	PASS
2_31384	Cowpea_IT97K-499-35_v1.0	Vu03	791882	[C/T]	SNP	0.429	0.302	0.111	6.014	PASS	PASS
2_26690	Cowpea_IT97K-499-35_v1.0	Vu03	839033	[G/A]	SNP	0.458	0.345	0.147	5.978	PASS	PASS
1_0146	Cowpea_IT97K-499-35_v1.0	Vu03	902271	[C/T]	SNP	0.363	0.402	0.111	5.929	PASS	PASS
2_30756	Cowpea_IT97K-499-35_v1.0	Vu03	948837	[T/G]	SNP	0.269	0.196	0.147	5.894	PASS	PASS
2_29386	Cowpea_IT97K-499-35_v1.0	Vu03	1036623	[G/T]	SNP	0.489	0.445	0.663	5.828	PASS	PASS
2_12141	Cowpea_IT97K-499-35_v1.0	Vu03	1087969	[A/G]	SNP	0.272	0.333	0.332	5.79	PASS	PASS
2_24098	Cowpea_IT97K-499-35_v1.0	Vu03	1135487	[A/C]	SNP	0.399	0.356	0.295	5.754	PASS	PASS
2_00134	Cowpea_IT97K-499-35_v1.0	Vu03	1185131	[T/C]	SNP	0.364	0.378	0.184	5.718	PASS	PASS
2_49366	Cowpea_IT97K-499-35_v1.0	Vu03	1226815	[T/G]	SNP	0.225	0.281	0.442	5.687	PASS	PASS
2_19820	Cowpea_IT97K-499-35_v1.0	Vu03	1285373	[C/T]	SNP	0.29	0.228	0.111	5.645	PASS	PASS
2_16222	Cowpea_IT97K-499-35_v1.0	Vu03	1338050	[A/G]	SNP	0.389	0.429	0.332	5.607	PASS	PASS
2_13641	Cowpea_IT97K-499-35_v1.0	Vu03	1403089	[A/C]	SNP	0.243	0.332	0.405	5.56	PASS	PASS
2_30882	Cowpea_IT97K-499-35_v1.0	Vu03	1450327	[G/A]	SNP	0.276	0.266	0.258	5.527	PASS	PASS
2_11793	Cowpea_IT97K-499-35_v1.0	Vu03	1498078	[T/C]	SNP	0.305	0.353	0.147	5.493	PASS	PASS
2_08389	Cowpea_IT97K-499-35_v1.0	Vu03	1539862	[G/A]	SNP	0.316	0.44	0.626	5.464	PASS	PASS
2_30254	Cowpea_IT97K-499-35_v1.0	Vu03	1589735	[T/C]	SNP	0.305	0.418	0.037	5.429	PASS	PASS
2_05312	Cowpea_IT97K-499-35_v1.0	Vu03	1641589	[G/A]	SNP	0.338	0.364	0.442	5.394	PASS	PASS
2_18798	Cowpea_IT97K-499-35_v1.0	Vu03	1784217	[G/T]	SNP	0.3	0.339	0.479	5.297	PASS	PASS
2_26549	Cowpea_IT97K-499-35_v1.0	Vu03	1828292	[A/G]	SNP	0.306	0.348	0.663	5.267	PASS	PASS
2_22492	Cowpea_IT97K-499-35_v1.0	Vu03	1878352	[A/C]	SNP	0.317	0.321	0.184	5.234	PASS	PASS
2_32611	Cowpea_IT97K-499-35_v1.0	Vu03	1946855	[G/C]	SNP	0.29	0.315	0.368	5.188	PASS	PASS
2_26572	Cowpea_IT97K-499-35_v1.0	Vu03	1991560	[C/T]	SNP	0.455	0.383	0.442	5.159	PASS	PASS
2_19891	Cowpea_IT97K-499-35_v1.0	Vu03	2036535	[C/A]	SNP	0.421	0.293	0.479	5.13	PASS	PASS
2_19764	Cowpea_IT97K-499-35_v1.0	Vu03	2104646	[T/C]	SNP	0.476	0.408	0.111	5.086	PASS	PASS
2_01673	Cowpea_IT97K-499-35_v1.0	Vu03	2156133	[G/T]	SNP	0.372	0.247	0.405	5.053	PASS	PASS
2_01756	Cowpea_IT97K-499-35_v1.0	Vu03	2212521	[C/T]	SNP	0.269	0.227	0.221	5.017	PASS	PASS
2_31896	Cowpea_IT97K-499-35_v1.0	Vu03	2263264	[A/G]	SNP	0.353	0.253	0.516	4.985	PASS	PASS
2_05726	Cowpea_IT97K-499-35_v1.0	Vu03	2340192	[A/G]	SNP	0.312	0.467	0.258	4.937	PASS	PASS
2_09455	Cowpea_IT97K-499-35_v1.0	Vu03	2416500	[T/G]	SNP	0.414	0.473	0.074	4.89	PASS	PASS
2_31075	Cowpea_IT97K-499-35_v1.0	Vu03	2465752	[C/T]	SNP	0.282	0.191	1.732	4.859	PASS	PASS
2_41360	Cowpea_IT97K-499-35_v1.0	Vu03	2541981	[C/T]	SNP	0.495	0.475	0.258	4.813	PASS	PASS
2_15958	Cowpea_IT97K-499-35_v1.0	Vu03	2607762	[C/T]	SNP	0.42	0.301	0.368	4.774	PASS	PASS
2_27512	Cowpea_IT97K-499-35_v1.0	Vu03	2707709	[C/T]	SNP	0.281	0.249	0.553	4.714	PASS	PASS
2_22105	Cowpea_IT97K-499-35_v1.0	Vu03	2781961	[C/T]	SNP	0.312	0.456	0.59	4.671	PASS	PASS
2_14148	Cowpea_IT97K-499-35_v1.0	Vu03	2848650	[G/A]	SNP	0.484	0.331	0.442	4.632	PASS	PASS
2_30573	Cowpea_IT97K-499-35_v1.0	Vu03	2913227	[C/A]	SNP	0.241	0.25	0.516	4.595	PASS	PASS
2_30720	Cowpea_IT97K-499-35_v1.0	Vu03	2965058	[A/G]	SNP	0.44	0.443	0.516	4.566	PASS	PASS
2_08945	Cowpea_IT97K-499-35_v1.0	Vu03	3028219	[T/C]	SNP	0.485	0.497	0.221	4.53	PASS	PASS
2_14174	Cowpea_IT97K-499-35_v1.0	Vu03	3231839	[T/C]	SNP	0.335	0.38	0.295	4.417	PASS	PASS
2_28141	Cowpea_IT97K-499-35_v1.0	Vu03	3286952	[C/T]	SNP	0.368	0.495	0.553	4.387	PASS	PASS
2_33077	Cowpea_IT97K-499-35_v1.0	Vu03	3348161	[G/C]	SNP	0.363	0.383	0.295	4.354	PASS	PASS
2_09352	Cowpea_IT97K-499-35_v1.0	Vu03	3409470	[G/T]	SNP	0.452	0.473	0.368	4.322	PASS	PASS
2_21124	Cowpea_IT97K-499-35_v1.0	Vu03	3467475	[C/T]	SNP	0.331	0.315	0.221	4.291	PASS	PASS
2_52002	Cowpea_IT97K-499-35_v1.0	Vu03	3538147	[G/A]	SNP	0.422	0.418	0.479	4.254	PASS	PASS
2_09849	Cowpea_IT97K-499-35_v1.0	Vu03	3594938	[T/C]	SNP	0.386	0.402	0.442	4.225	PASS	PASS
2_02881	Cowpea_IT97K-499-35_v1.0	Vu03	3652482	[G/A]	SNP	0.412	0.429	0.516	4.195	PASS	PASS
2_05687	Cowpea_IT97K-499-35_v1.0	Vu03	3707577	[T/G]	SNP	0.465	0.451	3.5	4.167	PASS	PASS
2_05202	Cowpea_IT97K-499-35_v1.0	Vu03	3764110	[G/A]	SNP	0.419	0.399	0.295	4.139	PASS	PASS
2_32559	Cowpea_IT97K-499-35_v1.0	Vu03	3839959	[A/T]	SNP	0.494	0.484	0.516	4.101	PASS	PASS
2_20826	Cowpea_IT97K-499-35_v1.0	Vu03	4009256	[T/C]	SNP	0.238	0.323	0.405	4.018	PASS	PASS
2_40027	Cowpea_IT97K-499-35_v1.0	Vu03	4138118	[G/A]	SNP	0.272	0.223	0.111	3.956	PASS	PASS
2_11669	Cowpea_IT97K-499-35_v1.0	Vu03	4219462	[G/A]	SNP	0.303	0.323	0.221	3.917	PASS	PASS
2_05084	Cowpea_IT97K-499-35_v1.0	Vu03	4284316	[T/C]	SNP	0.336	0.348	0.405	3.887	PASS	PASS
2_31241	Cowpea_IT97K-499-35_v1.0	Vu03	4398446	[G/A]	SNP	0.395	0.443	0.884	3.835	PASS	PASS
2_16439	Cowpea_IT97K-499-35_v1.0	Vu03	4505745	[A/C]	SNP	0.245	0.353	0.59	3.786	PASS	PASS
2_26630	Cowpea_IT97K-499-35_v1.0	Vu03	4587162	[G/A]	SNP	0.474	0.478	0.737	3.75	PASS	PASS
2_53761	Cowpea_IT97K-499-35_v1.0	Vu03	4657938	[T/C]	SNP	0.445	0.421	2.211	3.719	PASS	PASS
2_14315	Cowpea_IT97K-499-35_v1.0	Vu03	4733073	[G/A]	SNP	0.494	0.467	0.405	3.686	PASS	PASS
2_10631	Cowpea_IT97K-499-35_v1.0	Vu03	4812132	[C/T]	SNP	0.479	0.451	0.332	3.652	PASS	PASS
2_03019	Cowpea_IT97K-499-35_v1.0	Vu03	4877908	[G/A]	SNP	0.306	0.427	0.332	3.624	PASS	PASS
2_30781	Cowpea_IT97K-499-35_v1.0	Vu03	4941855	[G/A]	SNP	0.478	0.408	0.59	3.597	PASS	PASS
2_18835	Cowpea_IT97K-499-35_v1.0	Vu03	5008205	[G/A]	SNP	0.477	0.353	0.184	3.569	PASS	PASS
2_31495	Cowpea_IT97K-499-35_v1.0	Vu03	5156296	[T/G]	SNP	0.42	0.459	0.7	3.508	PASS	PASS
2_33640	Cowpea_IT97K-499-35_v1.0	Vu03	5222156	[C/G]	SNP	0.261	0.304	0.442	3.482	PASS	PASS
2_38832	Cowpea_IT97K-499-35_v1.0	Vu03	5328675	[G/T]	SNP	0.343	0.462	0.7	3.439	PASS	PASS
2_28278	Cowpea_IT97K-499-35_v1.0	Vu03	5396134	[T/G]	SNP	0.255	0.226	0.258	3.413	PASS	PASS
2_20391	Cowpea_IT97K-499-35_v1.0	Vu03	5466662	[A/G]	SNP	0.273	0.247	0.147	3.385	PASS	PASS
2_51815	Cowpea_IT97K-499-35_v1.0	Vu03	5547428	[A/C]	SNP	0.445	0.484	0.626	3.354	PASS	PASS
2_20519	Cowpea_IT97K-499-35_v1.0	Vu03	5621967	[A/G]	SNP	0.444	0.495	0.442	3.326	PASS	PASS
2_22526	Cowpea_IT97K-499-35_v1.0	Vu03	5993062	[A/C]	SNP	0.22	0.261	0.184	3.19	PASS	PASS
2_49717	Cowpea_IT97K-499-35_v1.0	Vu03	6068272	[T/A]	SNP	0.267	0.253	0.368	3.163	PASS	PASS
2_34551	Cowpea_IT97K-499-35_v1.0	Vu03	6154953	[A/T]	SNP	0.337	0.285	0.405	3.133	PASS	PASS
2_03552	Cowpea_IT97K-499-35_v1.0	Vu03	6253514	[C/T]	SNP	0.491	0.394	0.368	3.099	PASS	PASS
2_05265	Cowpea_IT97K-499-35_v1.0	Vu03	6330813	[A/G]	SNP	0.473	0.427	0.59	3.073	PASS	PASS
2_13448	Cowpea_IT97K-499-35_v1.0	Vu03	6490561	[G/A]	SNP	0.304	0.261	0.221	3.02	PASS	PASS
2_22750	Cowpea_IT97K-499-35_v1.0	Vu03	6590646	[A/C]	SNP	0.304	0.27	0.479	2.987	PASS	PASS
2_02209	Cowpea_IT97K-499-35_v1.0	Vu03	6667719	[A/C]	SNP	0.275	0.258	0.405	2.962	PASS	PASS
2_09590	Cowpea_IT97K-499-35_v1.0	Vu03	6751445	[A/G]	SNP	0.425	0.285	0.074	2.936	PASS	PASS
2_19742	Cowpea_IT97K-499-35_v1.0	Vu03	6830305	[G/T]	SNP	0.29	0.451	0.59	2.911	PASS	PASS
2_12216	Cowpea_IT97K-499-35_v1.0	Vu03	6919202	[C/T]	SNP	0.47	0.34	0.405	2.883	PASS	PASS
2_11210	Cowpea_IT97K-499-35_v1.0	Vu03	7010810	[C/T]	SNP	0.315	0.293	0.59	2.855	PASS	PASS
2_13698	Cowpea_IT97K-499-35_v1.0	Vu03	7091914	[A/C]	SNP	0.496	0.315	0.111	2.831	PASS	PASS
2_29798	Cowpea_IT97K-499-35_v1.0	Vu03	7175035	[T/C]	SNP	0.381	0.429	0.147	2.806	PASS	PASS
2_03886	Cowpea_IT97K-499-35_v1.0	Vu03	7263399	[C/T]	SNP	0.418	0.397	0.405	2.78	PASS	PASS
2_17377	Cowpea_IT97K-499-35_v1.0	Vu03	7441291	[A/G]	SNP	0.487	0.44	0.184	2.729	PASS	PASS
2_16729	Cowpea_IT97K-499-35_v1.0	Vu03	7557695	[A/C]	SNP	0.384	0.31	0.184	2.696	PASS	PASS
2_23296	Cowpea_IT97K-499-35_v1.0	Vu03	7651009	[C/T]	SNP	0.363	0.307	0.368	2.671	PASS	PASS
2_04426	Cowpea_IT97K-499-35_v1.0	Vu03	7778918	[T/G]	SNP	0.293	0.272	0.405	2.636	PASS	PASS
2_13830	Cowpea_IT97K-499-35_v1.0	Vu03	7874656	[A/C]	SNP	0.373	0.385	0.184	2.61	PASS	PASS
2_23252	Cowpea_IT97K-499-35_v1.0	Vu03	7984230	[A/G]	SNP	0.279	0.22	0.111	2.581	PASS	PASS
2_49340	Cowpea_IT97K-499-35_v1.0	Vu03	8109888	[A/C]	SNP	0.272	0.262	0.811	2.549	PASS	PASS
2_20356	Cowpea_IT97K-499-35_v1.0	Vu03	8229292	[T/C]	SNP	0.263	0.239	0.184	2.519	PASS	PASS
2_19895	Cowpea_IT97K-499-35_v1.0	Vu03	8321174	[G/T]	SNP	0.268	0.239	0.147	2.496	PASS	PASS
2_15583	Cowpea_IT97K-499-35_v1.0	Vu03	8423934	[T/G]	SNP	0.273	0.182	0.258	2.471	PASS	PASS
2_03919	Cowpea_IT97K-499-35_v1.0	Vu03	8526894	[C/T]	SNP	0.382	0.302	0.405	2.446	PASS	PASS
2_16423	Cowpea_IT97K-499-35_v1.0	Vu03	8623486	[A/G]	SNP	0.276	0.291	0.368	2.423	PASS	PASS
2_14323	Cowpea_IT97K-499-35_v1.0	Vu03	8721779	[A/G]	SNP	0.298	0.334	0.147	2.4	PASS	PASS
2_33970	Cowpea_IT97K-499-35_v1.0	Vu03	8817644	[G/C]	SNP	0.3	0.313	0.59	2.378	PASS	PASS
2_25249	Cowpea_IT97K-499-35_v1.0	Vu03	8915777	[G/A]	SNP	0.405	0.367	0.405	2.355	PASS	PASS
2_02820	Cowpea_IT97K-499-35_v1.0	Vu03	9098606	[G/A]	SNP	0.225	0.294	0.59	2.314	PASS	PASS
2_34087	Cowpea_IT97K-499-35_v1.0	Vu03	9443647	[T/A]	SNP	0.216	0.264	0.479	2.24	PASS	PASS
2_46316	Cowpea_IT97K-499-35_v1.0	Vu03	9625879	[T/C]	SNP	0.112	0.256	0.405	2.203	PASS	PASS
2_06190	Cowpea_IT97K-499-35_v1.0	Vu03	9739604	[T/G]	SNP	0.239	0.288	0.295	2.18	PASS	PASS
2_51119	Cowpea_IT97K-499-35_v1.0	Vu03	10095388	[C/A]	SNP	0.306	0.178	6.559	2.11	PASS	PASS
2_44556	Cowpea_IT97K-499-35_v1.0	Vu03	10220351	[A/G]	SNP	0.415	0.383	0.516	2.087	PASS	PASS
2_39600	Cowpea_IT97K-499-35_v1.0	Vu03	10350735	[C/T]	SNP	0.336	0.232	0.737	2.062	PASS	PASS
2_31611	Cowpea_IT97K-499-35_v1.0	Vu03	10486794	[T/C]	SNP	0.467	0.486	0.221	2.038	PASS	PASS
2_42006	Cowpea_IT97K-499-35_v1.0	Vu03	10622173	[A/C]	SNP	0.474	0.47	0.405	2.013	PASS	PASS
2_31904	Cowpea_IT97K-499-35_v1.0	Vu03	10748899	[T/C]	SNP	0.479	0.353	0.221	1.991	PASS	PASS
2_49444	Cowpea_IT97K-499-35_v1.0	Vu03	10872618	[T/C]	SNP	0.352	0.467	0.405	1.97	PASS	PASS
2_40989	Cowpea_IT97K-499-35_v1.0	Vu03	11026633	[C/T]	SNP	0.403	0.274	0.553	1.944	PASS	PASS
2_05876	Cowpea_IT97K-499-35_v1.0	Vu03	11146809	[A/G]	SNP	0.34	0.29	0.553	1.924	PASS	PASS
2_13899	Cowpea_IT97K-499-35_v1.0	Vu03	11271275	[G/A]	SNP	0.422	0.448	0.184	1.903	PASS	PASS
2_23108	Cowpea_IT97K-499-35_v1.0	Vu03	11397547	[C/T]	SNP	0.341	0.274	0.111	1.883	PASS	PASS
2_02455	Cowpea_IT97K-499-35_v1.0	Vu03	11523204	[G/A]	SNP	0.315	0.274	0.332	1.863	PASS	PASS
2_06224	Cowpea_IT97K-499-35_v1.0	Vu03	11652250	[A/C]	SNP	0.323	0.264	1.032	1.843	PASS	PASS
2_23891	Cowpea_IT97K-499-35_v1.0	Vu03	11783548	[A/G]	SNP	0.324	0.253	0.221	1.823	PASS	PASS
2_02010	Cowpea_IT97K-499-35_v1.0	Vu03	11927071	[T/C]	SNP	0.494	0.386	0.368	1.801	PASS	PASS
2_47730	Cowpea_IT97K-499-35_v1.0	Vu03	12069264	[A/G]	SNP	0.257	0.417	0.958	1.78	PASS	PASS
2_51606	Cowpea_IT97K-499-35_v1.0	Vu03	12214242	[T/G]	SNP	0.425	0.401	1.032	1.759	PASS	PASS
2_11846	Cowpea_IT97K-499-35_v1.0	Vu03	12355344	[G/T]	SNP	0.325	0.226	0.332	1.738	PASS	PASS
2_11888	Cowpea_IT97K-499-35_v1.0	Vu03	12489415	[A/C]	SNP	0.352	0.29	0.221	1.719	PASS	PASS
2_54910	Cowpea_IT97K-499-35_v1.0	Vu03	12635247	[C/T]	SNP	0.404	0.344	0.663	1.699	PASS	PASS
2_04997	Cowpea_IT97K-499-35_v1.0	Vu03	12776959	[C/T]	SNP	0.404	0.34	0.258	1.68	PASS	PASS
2_19962	Cowpea_IT97K-499-35_v1.0	Vu03	12920631	[A/G]	SNP	0.416	0.342	0.368	1.66	PASS	PASS
2_26557	Cowpea_IT97K-499-35_v1.0	Vu03	13064954	[A/G]	SNP	0.34	0.291	0.368	1.641	PASS	PASS
2_43320	Cowpea_IT97K-499-35_v1.0	Vu03	13209456	[T/C]	SNP	0.386	0.333	8.99	1.622	PASS	PASS
2_20745	Cowpea_IT97K-499-35_v1.0	Vu03	13353682	[C/T]	SNP	0.32	0.277	0.147	1.603	PASS	PASS
2_42558	Cowpea_IT97K-499-35_v1.0	Vu03	13932088	[A/G]	SNP	0.176	0.192	3.279	1.531		PASS
2_45843	Cowpea_IT97K-499-35_v1.0	Vu03	14468699	[T/C]	SNP	0.28	0.28	0.221	1.468	PASS	PASS
2_54604	Cowpea_IT97K-499-35_v1.0	Vu03	14627176	[A/G]	SNP	0.477	0.459	0.626	1.45	PASS	PASS
2_43730	Cowpea_IT97K-499-35_v1.0	Vu03	14801913	[G/T]	SNP	0.284	0.272	0.442	1.43	PASS	PASS
2_41051	Cowpea_IT97K-499-35_v1.0	Vu03	14993057	[C/T]	SNP	0.439	0.41	0.332	1.408	PASS	PASS
2_10733	Cowpea_IT97K-499-35_v1.0	Vu03	15161091	[G/A]	SNP	0.331	0.212	0.295	1.39	PASS	PASS
2_29708	Cowpea_IT97K-499-35_v1.0	Vu03	15332026	[A/G]	SNP	0.461	0.274	0.479	1.371	PASS	PASS
2_50469	Cowpea_IT97K-499-35_v1.0	Vu03	15507085	[C/A]	SNP	0.317	0.489	0.553	1.352	PASS	PASS
2_01092	Cowpea_IT97K-499-35_v1.0	Vu03	15680006	[A/C]	SNP	0.288	0.429	0.405	1.334	PASS	PASS
2_25484	Cowpea_IT97K-499-35_v1.0	Vu03	15909305	[A/G]	SNP	0.267	0.408	0.332	1.31	PASS	PASS
2_17476	Cowpea_IT97K-499-35_v1.0	Vu03	16380283	[G/A]	SNP	0.325	0.307	0.368	1.262	PASS	PASS
2_39129	Cowpea_IT97K-499-35_v1.0	Vu03	16641847	[A/G]	SNP	0.079	0.257	0.737	1.236	PASS	PASS
2_26051	Cowpea_IT97K-499-35_v1.0	Vu03	16839463	[T/G]	SNP	0.33	0.29	0.774	1.217	PASS	PASS
2_50118	Cowpea_IT97K-499-35_v1.0	Vu03	17086896	[T/C]	SNP	0.089	0.277	1.732	1.193	PASS	PASS
2_40092	Cowpea_IT97K-499-35_v1.0	Vu03	17605066	[A/C]	SNP	0.207	0.295	1.695	1.144	PASS	PASS
2_39495	Cowpea_IT97K-499-35_v1.0	Vu03	17832035	[A/C]	SNP	0.146	0.337	0.147	1.123	PASS	PASS
2_28609	Cowpea_IT97K-499-35_v1.0	Vu03	18060363	[A/G]	SNP	0.349	0.291	0.332	1.102	PASS	PASS
2_39633	Cowpea_IT97K-499-35_v1.0	Vu03	18301635	[A/G]	SNP	0.495	0.407	2.395	1.081	PASS	PASS
2_33715	Cowpea_IT97K-499-35_v1.0	Vu03	18527479	[T/A]	SNP	0.443	0.389	0.405	1.061	PASS	PASS
2_01469	Cowpea_IT97K-499-35_v1.0	Vu03	18750309	[C/T]	SNP	0.492	0.375	0.368	1.041	PASS	PASS
2_47136	Cowpea_IT97K-499-35_v1.0	Vu03	18976995	[C/T]	SNP	0.253	0.467	0.7	1.022	PASS	PASS
2_03836	Cowpea_IT97K-499-35_v1.0	Vu03	19381971	[T/C]	SNP	0.41	0.35	0.737	0.988	PASS	PASS
2_47731	Cowpea_IT97K-499-35_v1.0	Vu03	19618994	[A/G]	SNP	0.452	0.303	0.553	0.968	PASS	PASS
2_50462	Cowpea_IT97K-499-35_v1.0	Vu03	19861983	[T/C]	SNP	0.459	0.413	2.653	0.948	PASS	PASS
2_47139	Cowpea_IT97K-499-35_v1.0	Vu03	20112454	[A/G]	SNP	0.442	0.396	0.553	0.929	PASS	PASS
2_04469	Cowpea_IT97K-499-35_v1.0	Vu03	20401017	[C/T]	SNP	0.388	0.492	0.295	0.906	PASS	PASS
2_40309	Cowpea_IT97K-499-35_v1.0	Vu03	20579350	[A/G]	SNP	0.353	0.457	0.405	0.893	PASS	PASS
2_54194	Cowpea_IT97K-499-35_v1.0	Vu03	20988486	[A/G]	SNP	0.203	0.405	0.479	0.862	PASS	PASS
2_34159	Cowpea_IT97K-499-35_v1.0	Vu03	21168374	[T/A]	SNP	0.393	0.489	1.474	0.849	PASS	PASS
2_44497	Cowpea_IT97K-499-35_v1.0	Vu03	21361106	[T/C]	SNP	0.457	0.396	0.479	0.835	PASS	PASS
2_39441	Cowpea_IT97K-499-35_v1.0	Vu03	21574774	[T/G]	SNP	0.322	0.185	0.405	0.821	PASS	PASS
2_37604	Cowpea_IT97K-499-35_v1.0	Vu03	21810300	[A/G]	SNP	0.338	0.204	0.442	0.805	PASS	PASS
2_54159	Cowpea_IT97K-499-35_v1.0	Vu03	22010383	[A/G]	SNP	0.358	0.236	0.368	0.791	PASS	PASS
2_07250	Cowpea_IT97K-499-35_v1.0	Vu03	22215090	[G/A]	SNP	0.476	0.383	0.479	0.778	PASS	PASS
2_44822	Cowpea_IT97K-499-35_v1.0	Vu03	22423257	[T/C]	SNP	0.411	0.337	1.216	0.765	PASS	PASS
2_42445	Cowpea_IT97K-499-35_v1.0	Vu03	22652958	[C/A]	SNP	0.315	0.22	0.479	0.751	PASS	PASS
2_39033	Cowpea_IT97K-499-35_v1.0	Vu03	22865270	[T/C]	SNP	0.35	0.221	0.884	0.739	PASS	PASS
2_48304	Cowpea_IT97K-499-35_v1.0	Vu03	23197055	[A/G]	SNP	0.46	0.386	0.479	0.72	PASS	PASS
2_12174	Cowpea_IT97K-499-35_v1.0	Vu03	23460918	[T/G]	SNP	0.288	0.125	0.479	0.706	PASS	PASS
2_40018	Cowpea_IT97K-499-35_v1.0	Vu03	23774633	[T/C]	SNP	0.279	0.147	0.442	0.69	PASS	PASS
2_16694	Cowpea_IT97K-499-35_v1.0	Vu03	24132244	[C/T]	SNP	0.258	0.193	0.295	0.673	PASS	PASS
2_49615	Cowpea_IT97K-499-35_v1.0	Vu03	24462107	[T/G]	SNP	0.265	0.215	0.295	0.658	PASS	PASS
2_42070	Cowpea_IT97K-499-35_v1.0	Vu03	24702128	[C/T]	SNP	0.26	0.199	0.663	0.649	PASS	PASS
2_00856	Cowpea_IT97K-499-35_v1.0	Vu03	25132282	[G/A]	SNP	0.261	0.465	0.332	0.633	PASS	PASS
2_38458	Cowpea_IT97K-499-35_v1.0	Vu03	25663863	[G/T]	SNP	0.259	0.472	0.737	0.616	PASS	PASS
2_43300	Cowpea_IT97K-499-35_v1.0	Vu03	25942005	[T/G]	SNP	0.366	0.454	0.626	0.609	PASS	PASS
2_52999	Cowpea_IT97K-499-35_v1.0	Vu03	26203953	[A/G]	SNP	0.25	0.472	0.59	0.604	PASS	PASS
2_40601	Cowpea_IT97K-499-35_v1.0	Vu03	26467598	[A/G]	SNP	0.377	0.36	2.506	0.599	PASS	PASS
2_00628	Cowpea_IT97K-499-35_v1.0	Vu03	26806747	[G/T]	SNP	0.281	0.266	0.368	0.594	PASS	PASS
2_44324	Cowpea_IT97K-499-35_v1.0	Vu03	27376303	[T/C]	SNP	0.186	0.417	0.847	0.59	PASS	PASS
2_52429	Cowpea_IT97K-499-35_v1.0	Vu03	27820943	[A/G]	SNP	0.173	0.402	0.847	0.59	PASS	PASS
2_14586	Cowpea_IT97K-499-35_v1.0	Vu03	28131991	[C/A]	SNP	0.213	0.304	0.332	0.592	PASS	PASS
2_54574	Cowpea_IT97K-499-35_v1.0	Vu03	28388802	[C/T]	SNP	0.196	0.295	4.016	0.595	PASS	PASS
2_44633	Cowpea_IT97K-499-35_v1.0	Vu03	28766538	[C/T]	SNP	0.432	0.486	0.7	0.601	PASS	PASS
2_06323	Cowpea_IT97K-499-35_v1.0	Vu03	29024086	[C/T]	SNP	0.432	0.481	0.59	0.606	PASS	PASS
2_05538	Cowpea_IT97K-499-35_v1.0	Vu03	29283459	[T/C]	SNP	0.432	0.484	0.405	0.613	PASS	PASS
2_40666	Cowpea_IT97K-499-35_v1.0	Vu03	30021463	[T/G]	SNP	0.242	0.412	0.847	0.638	PASS	PASS
2_41971	Cowpea_IT97K-499-35_v1.0	Vu03	30294246	[A/G]	SNP	0.245	0.414	0.737	0.649	PASS	PASS
2_43109	Cowpea_IT97K-499-35_v1.0	Vu03	31526082	[C/T]	SNP	0.431	0.494	1.142	0.718	PASS	PASS
2_43143	Cowpea_IT97K-499-35_v1.0	Vu03	32227356	[G/T]	SNP	0.43	0.5	0.516	0.769	PASS	PASS
2_54145	Cowpea_IT97K-499-35_v1.0	Vu03	32446175	[A/G]	SNP	0.228	0.383	3.464	0.787	PASS	PASS
2_40351	Cowpea_IT97K-499-35_v1.0	Vu03	32655065	[G/A]	SNP	0.429	0.494	1.142	0.805	PASS	PASS
2_05812	Cowpea_IT97K-499-35_v1.0	Vu03	32849867	[T/C]	SNP	0.257	0.405	0.147	0.822	PASS	PASS
2_50215	Cowpea_IT97K-499-35_v1.0	Vu03	33031619	[T/G]	SNP	0.11	0.272	0.737	0.838	PASS	PASS
2_38555	Cowpea_IT97K-499-35_v1.0	Vu03	33232895	[T/C]	SNP	0.17	0.301	8.511	0.857	PASS	PASS
2_49975	Cowpea_IT97K-499-35_v1.0	Vu03	33787308	[A/C]	SNP	0.394	0.326	0.7	0.913	PASS	PASS
2_18938	Cowpea_IT97K-499-35_v1.0	Vu03	34827512	[G/A]	SNP	0.236	0.438	0.147	1.031	PASS	PASS
2_37499	Cowpea_IT97K-499-35_v1.0	Vu03	35058545	[T/C]	SNP	0.246	0.468	8.511	1.059	PASS	PASS
2_38761	Cowpea_IT97K-499-35_v1.0	Vu03	35284356	[G/A]	SNP	0.227	0.296	0.147	1.088	PASS	PASS
2_22772	Cowpea_IT97K-499-35_v1.0	Vu03	35491566	[A/G]	SNP	0.306	0.497	0.332	1.115	PASS	PASS
2_17572	Cowpea_IT97K-499-35_v1.0	Vu03	35707107	[T/C]	SNP	0.41	0.402	0.368	1.143	PASS	PASS
2_20117	Cowpea_IT97K-499-35_v1.0	Vu03	35924752	[C/T]	SNP	0.272	0.478	0.147	1.173	PASS	PASS
2_03716	Cowpea_IT97K-499-35_v1.0	Vu03	36120876	[A/G]	SNP	0.274	0.219	1.363	1.2	PASS	PASS
2_46154	Cowpea_IT97K-499-35_v1.0	Vu03	36338601	[G/A]	SNP	0.344	0.291	0.147	1.23	PASS	PASS
2_24039	Cowpea_IT97K-499-35_v1.0	Vu03	36526220	[A/G]	SNP	0.401	0.285	0.147	1.257	PASS	PASS
2_06032	Cowpea_IT97K-499-35_v1.0	Vu03	36727580	[C/T]	SNP	0.33	0.253	0.037	1.286	PASS	PASS
2_51359	Cowpea_IT97K-499-35_v1.0	Vu03	36908601	[A/G]	SNP	0.311	0.122	0.074	1.313	PASS	PASS
2_16146	Cowpea_IT97K-499-35_v1.0	Vu03	37108864	[C/T]	SNP	0.304	0.269	0.111	1.342	PASS	PASS
2_24378	Cowpea_IT97K-499-35_v1.0	Vu03	37284829	[G/A]	SNP	0.376	0.345	0.147	1.369	PASS	PASS
2_47402	Cowpea_IT97K-499-35_v1.0	Vu03	37456874	[A/G]	SNP	0.353	0.226	0.479	1.395	PASS	PASS
2_02854	Cowpea_IT97K-499-35_v1.0	Vu03	37633185	[C/T]	SNP	0.406	0.476	0.111	1.422	PASS	PASS
2_12296	Cowpea_IT97K-499-35_v1.0	Vu03	37803960	[G/A]	SNP	0.371	0.342	1.363	1.449	PASS	PASS
2_42758	Cowpea_IT97K-499-35_v1.0	Vu03	38126045	[T/C]	SNP	0.448	0.497	0.516	1.499	PASS	PASS
2_43455	Cowpea_IT97K-499-35_v1.0	Vu03	38522983	[A/C]	SNP	0.403	0.269	0.811	1.563	PASS	PASS
2_07809	Cowpea_IT97K-499-35_v1.0	Vu03	38767547	[T/C]	SNP	0.464	0.348	0.184	1.602	PASS	PASS
2_45224	Cowpea_IT97K-499-35_v1.0	Vu03	39012376	[C/G]	SNP	0.323	0.264	0.479	1.642	PASS	PASS
2_31350	Cowpea_IT97K-499-35_v1.0	Vu03	39163931	[A/G]	SNP	0.229	0.33	0.995	1.667	PASS	PASS
2_24372	Cowpea_IT97K-499-35_v1.0	Vu03	39315393	[T/G]	SNP	0.466	0.337	0.295	1.691	PASS	PASS
2_18864	Cowpea_IT97K-499-35_v1.0	Vu03	39460711	[C/T]	SNP	0.24	0.438	0.516	1.715	PASS	PASS
2_10455	Cowpea_IT97K-499-35_v1.0	Vu03	39618312	[G/A]	SNP	0.342	0.464	0.405	1.741	PASS	PASS
2_47282	Cowpea_IT97K-499-35_v1.0	Vu03	39747712	[T/C]	SNP	0.363	0.486	0.479	1.763	PASS	PASS
2_39184	Cowpea_IT97K-499-35_v1.0	Vu03	39893994	[G/C]	SNP	0.408	0.197	0.516	1.787	PASS	PASS
2_15435	Cowpea_IT97K-499-35_v1.0	Vu03	40105110	[T/G]	SNP	0.273	0.277	0.442	1.822	PASS	PASS
2_30325	Cowpea_IT97K-499-35_v1.0	Vu03	40276677	[C/T]	SNP	0.276	0.264	1.179	1.85	PASS	PASS
2_52408	Cowpea_IT97K-499-35_v1.0	Vu03	40428746	[T/C]	SNP	0.292	0.476	8.548	1.875	PASS	PASS
2_10613	Cowpea_IT97K-499-35_v1.0	Vu03	40555322	[G/A]	SNP	0.391	0.329	0.111	1.896	PASS	PASS
2_15830	Cowpea_IT97K-499-35_v1.0	Vu03	40711670	[G/A]	SNP	0.267	0.133	0.111	1.922	PASS	PASS
2_11464	Cowpea_IT97K-499-35_v1.0	Vu03	40831223	[A/G]	SNP	0.362	0.253	0.258	1.941	PASS	PASS
2_14327	Cowpea_IT97K-499-35_v1.0	Vu03	40956918	[G/T]	SNP	0.471	0.476	0.553	1.962	PASS	PASS
2_34161	Cowpea_IT97K-499-35_v1.0	Vu03	41103872	[C/G]	SNP	0.297	0.428	0.626	1.986	PASS	PASS
2_07139	Cowpea_IT97K-499-35_v1.0	Vu03	41298310	[A/G]	SNP	0.217	0.386	3.906	2.018	PASS	PASS
2_55160	Cowpea_IT97K-499-35_v1.0	Vu03	41616817	[G/A]	SNP	0.293	0.182	3.39	2.069	PASS	PASS
2_23841	Cowpea_IT97K-499-35_v1.0	Vu03	41729408	[G/A]	SNP	0.304	0.269	0.405	2.088	PASS	PASS
2_10184	Cowpea_IT97K-499-35_v1.0	Vu03	41874868	[C/T]	SNP	0.19	0.332	0.111	2.111	PASS	PASS
2_10375	Cowpea_IT97K-499-35_v1.0	Vu03	41992555	[G/A]	SNP	0.326	0.188	0.074	2.13	PASS	PASS
2_54116	Cowpea_IT97K-499-35_v1.0	Vu03	42102148	[G/A]	SNP	0.369	0.329	0.221	2.147	PASS	PASS
2_12979	Cowpea_IT97K-499-35_v1.0	Vu03	42215662	[C/T]	SNP	0.467	0.359	0.442	2.165	PASS	PASS
2_06727	Cowpea_IT97K-499-35_v1.0	Vu03	42334920	[G/A]	SNP	0.433	0.408	0.258	2.183	PASS	PASS
2_44871	Cowpea_IT97K-499-35_v1.0	Vu03	42460597	[G/A]	SNP	0.363	0.17	1.069	2.203	PASS	PASS
2_18003	Cowpea_IT97K-499-35_v1.0	Vu03	42616966	[C/T]	SNP	0.308	0.239	0.074	2.227	PASS	PASS
2_08089	Cowpea_IT97K-499-35_v1.0	Vu03	42731352	[C/T]	SNP	0.384	0.321	0.184	2.245	PASS	PASS
2_29505	Cowpea_IT97K-499-35_v1.0	Vu03	42902181	[T/C]	SNP	0.447	0.387	2.579	2.27	PASS	PASS
2_26097	Cowpea_IT97K-499-35_v1.0	Vu03	43155448	[A/G]	SNP	0.439	0.5	3.648	2.308	PASS	PASS
2_13357	Cowpea_IT97K-499-35_v1.0	Vu03	43256288	[G/T]	SNP	0.407	0.402	0.111	2.323	PASS	PASS
2_45043	Cowpea_IT97K-499-35_v1.0	Vu03	43435267	[A/G]	SNP	0.231	0.407	0.553	2.349	PASS	PASS
2_32477	Cowpea_IT97K-499-35_v1.0	Vu03	43545517	[C/G]	SNP	0.465	0.399	0.368	2.365	PASS	PASS
2_02054	Cowpea_IT97K-499-35_v1.0	Vu03	43739482	[T/C]	SNP	0.14	0.342	0.111	2.392	PASS	PASS
2_07722	Cowpea_IT97K-499-35_v1.0	Vu03	44123256	[C/T]	SNP	0.179	0.109	0.295	2.445		PASS
2_51323	Cowpea_IT97K-499-35_v1.0	Vu03	44389343	[A/T]	SNP	0.174	0.332	0.626	2.48	PASS	PASS
2_16043	Cowpea_IT97K-499-35_v1.0	Vu03	44795500	[G/A]	SNP	0.142	0.12	0.184	2.531		PASS
2_51225	Cowpea_IT97K-499-35_v1.0	Vu03	45015514	[T/C]	SNP	0.258	0.408	0.074	2.557	PASS	PASS
2_55597	Cowpea_IT97K-499-35_v1.0	Vu03	45113776	[C/T]	SNP	0.369	0.484	0.516	2.569	PASS	PASS
2_47164	Cowpea_IT97K-499-35_v1.0	Vu03	45430922	[C/T]	SNP	0.232	0.396	0.737	2.605	PASS	PASS
2_45064	Cowpea_IT97K-499-35_v1.0	Vu03	45543522	[A/G]	SNP	0.205	0.256	1.069	2.617	PASS	PASS
2_23907	Cowpea_IT97K-499-35_v1.0	Vu03	45708535	[G/T]	SNP	0.16	0.315	0.479	2.635	PASS	PASS
2_47187	Cowpea_IT97K-499-35_v1.0	Vu03	45846873	[G/T]	SNP	0.215	0.344	1.695	2.649	PASS	PASS
2_33563	Cowpea_IT97K-499-35_v1.0	Vu03	46075236	[T/A]	SNP	0.238	0.307	0.074	2.672	PASS	PASS
2_42003	Cowpea_IT97K-499-35_v1.0	Vu03	46342934	[G/A]	SNP	0.23	0.443	0.258	2.697	PASS	PASS
2_04058	Cowpea_IT97K-499-35_v1.0	Vu03	46449361	[A/G]	SNP	0.29	0.258	0.479	2.706	PASS	PASS
1_0718	Cowpea_IT97K-499-35_v1.0	Vu03	46541263	[T/C]	SNP	0.385	0.438	0.074	2.714	PASS	PASS
1_0345	Cowpea_IT97K-499-35_v1.0	Vu03	46627017	[A/G]	SNP	0.489	0.364	0.442	2.721	PASS	PASS
2_00328	Cowpea_IT97K-499-35_v1.0	Vu03	46716422	[T/C]	SNP	0.416	0.467	0.553	2.729	PASS	PASS
2_30277	Cowpea_IT97K-499-35_v1.0	Vu03	46814755	[T/C]	SNP	0.444	0.369	0.958	2.736	PASS	PASS
2_05279	Cowpea_IT97K-499-35_v1.0	Vu03	46924151	[T/G]	SNP	0.352	0.307	0.442	2.745	PASS	PASS
2_38319	Cowpea_IT97K-499-35_v1.0	Vu03	47018598	[A/G]	SNP	0.28	0.488	1.916	2.752	PASS	PASS
2_31831	Cowpea_IT97K-499-35_v1.0	Vu03	47105242	[A/G]	SNP	0.498	0.375	0.59	2.758	PASS	PASS
2_48964	Cowpea_IT97K-499-35_v1.0	Vu03	47202782	[A/C]	SNP	0.271	0.272	0.184	2.765	PASS	PASS
2_21321	Cowpea_IT97K-499-35_v1.0	Vu03	47300269	[T/C]	SNP	0.328	0.478	0.147	2.772	PASS	PASS
2_10044	Cowpea_IT97K-499-35_v1.0	Vu03	47402160	[T/G]	SNP	0.431	0.432	0.332	2.778	PASS	PASS
2_54166	Cowpea_IT97K-499-35_v1.0	Vu03	47498862	[C/T]	SNP	0.214	0.299	0.516	2.784	PASS	PASS
2_13707	Cowpea_IT97K-499-35_v1.0	Vu03	47590929	[T/C]	SNP	0.307	0.432	0.184	2.79	PASS	PASS
2_50888	Cowpea_IT97K-499-35_v1.0	Vu03	47685001	[T/A]	SNP	0.247	0.429	0.7	2.795	PASS	PASS
2_34268	Cowpea_IT97K-499-35_v1.0	Vu03	47769493	[G/C]	SNP	0.249	0.434	0.332	2.8	PASS	PASS
2_49803	Cowpea_IT97K-499-35_v1.0	Vu03	48008318	[C/A]	SNP	0.294	0.32	0.368	2.812	PASS	PASS
2_54847	Cowpea_IT97K-499-35_v1.0	Vu03	48152883	[C/G]	SNP	0.252	0.201	0.184	2.819	PASS	PASS
2_00438	Cowpea_IT97K-499-35_v1.0	Vu03	48290067	[G/A]	SNP	0.306	0.217	0.332	2.824	PASS	PASS
2_10058	Cowpea_IT97K-499-35_v1.0	Vu03	48394714	[C/T]	SNP	0.396	0.495	0.884	2.828	PASS	PASS
2_08907	Cowpea_IT97K-499-35_v1.0	Vu03	48732185	[G/A]	SNP	0.127	0.147	0.184	2.839		PASS
2_53854	Cowpea_IT97K-499-35_v1.0	Vu03	49040922	[A/G]	SNP	0.123	0.136	0.295	2.846		PASS
2_32723	Cowpea_IT97K-499-35_v1.0	Vu03	49330360	[T/A]	SNP	0.386	0.478	0.884	2.851	PASS	PASS
2_34044	Cowpea_IT97K-499-35_v1.0	Vu03	49471311	[G/C]	SNP	0.481	0.372	0.479	2.852	PASS	PASS
2_23802	Cowpea_IT97K-499-35_v1.0	Vu03	49634167	[G/A]	SNP	0.409	0.475	0.884	2.853	PASS	PASS
1_0296	Cowpea_IT97K-499-35_v1.0	Vu03	49715358	[C/T]	SNP	0.279	0.197	0.147	2.853	PASS	PASS
2_42492	Cowpea_IT97K-499-35_v1.0	Vu03	49814876	[T/C]	SNP	0.301	0.342	0.479	2.853	PASS	PASS
2_16513	Cowpea_IT97K-499-35_v1.0	Vu03	49902029	[C/T]	SNP	0.396	0.25	0.368	2.852	PASS	PASS
2_19904	Cowpea_IT97K-499-35_v1.0	Vu03	50022917	[G/T]	SNP	0.398	0.473	0.442	2.852	PASS	PASS
2_40532	Cowpea_IT97K-499-35_v1.0	Vu03	50287644	[G/A]	SNP	0.262	0.136	1.032	2.848	PASS	PASS
2_41663	Cowpea_IT97K-499-35_v1.0	Vu03	50373269	[A/G]	SNP	0.352	0.323	0.405	2.847	PASS	PASS
2_18088	Cowpea_IT97K-499-35_v1.0	Vu03	50457658	[C/T]	SNP	0.343	0.313	0.405	2.845	PASS	PASS
2_39815	Cowpea_IT97K-499-35_v1.0	Vu03	50540693	[G/A]	SNP	0.428	0.47	0.479	2.844	PASS	PASS
2_50615	Cowpea_IT97K-499-35_v1.0	Vu03	50683081	[T/A]	SNP	0.288	0.16	0	2.84	PASS	PASS
2_45673	Cowpea_IT97K-499-35_v1.0	Vu03	50926727	[C/G]	SNP	0.479	0.362	1.142	2.833	PASS	PASS
2_31359	Cowpea_IT97K-499-35_v1.0	Vu03	51091440	[G/A]	SNP	0.206	0.436	0.663	2.827	PASS	PASS
2_17841	Cowpea_IT97K-499-35_v1.0	Vu03	51383763	[A/G]	SNP	0.31	0.253	0.405	2.815	PASS	PASS
2_14691	Cowpea_IT97K-499-35_v1.0	Vu03	51498849	[T/G]	SNP	0.424	0.391	0.405	2.81	PASS	PASS
2_00030	Cowpea_IT97K-499-35_v1.0	Vu03	51582534	[G/A]	SNP	0.418	0.386	0.184	2.806	PASS	PASS
2_09575	Cowpea_IT97K-499-35_v1.0	Vu03	51779966	[G/A]	SNP	0.312	0.232	0.332	2.796	PASS	PASS
2_27620	Cowpea_IT97K-499-35_v1.0	Vu03	51864129	[A/G]	SNP	0.462	0.413	0.368	2.791	PASS	PASS
2_18709	Cowpea_IT97K-499-35_v1.0	Vu03	51956447	[C/T]	SNP	0.444	0.478	0.368	2.786	PASS	PASS
2_46246	Cowpea_IT97K-499-35_v1.0	Vu03	52042390	[G/A]	SNP	0.458	0.407	1.732	2.781	PASS	PASS
2_31453	Cowpea_IT97K-499-35_v1.0	Vu03	52142240	[G/A]	SNP	0.333	0.437	0.442	2.775	PASS	PASS
2_15271	Cowpea_IT97K-499-35_v1.0	Vu03	52243700	[G/A]	SNP	0.252	0.258	0.516	2.769	PASS	PASS
2_12788	Cowpea_IT97K-499-35_v1.0	Vu03	52416566	[G/A]	SNP	0.228	0.262	3.242	2.758	PASS	PASS
2_39284	Cowpea_IT97K-499-35_v1.0	Vu03	52517778	[A/G]	SNP	0.294	0.307	1.216	2.751	PASS	PASS
2_07356	Cowpea_IT97K-499-35_v1.0	Vu03	52619065	[G/T]	SNP	0.293	0.311	0.295	2.744	PASS	PASS
2_22467	Cowpea_IT97K-499-35_v1.0	Vu03	52816277	[G/T]	SNP	0.257	0.448	0.184	2.73	PASS	PASS
2_54811	Cowpea_IT97K-499-35_v1.0	Vu03	52922719	[G/T]	SNP	0.439	0.388	0.405	2.722	PASS	PASS
2_22713	Cowpea_IT97K-499-35_v1.0	Vu03	53404695	[G/A]	SNP	0.27	0.25	0.479	2.684	PASS	PASS
2_45654	Cowpea_IT97K-499-35_v1.0	Vu03	53501201	[G/A]	SNP	0.267	0.155	0	2.676	PASS	PASS
2_22313	Cowpea_IT97K-499-35_v1.0	Vu03	53597763	[C/T]	SNP	0.295	0.245	0.332	2.668	PASS	PASS
2_32794	Cowpea_IT97K-499-35_v1.0	Vu03	53764550	[C/G]	SNP	0.19	0.254	0.479	2.653	PASS	PASS
2_21162	Cowpea_IT97K-499-35_v1.0	Vu03	53859576	[C/A]	SNP	0.274	0.323	0.442	2.645	PASS	PASS
2_53518	Cowpea_IT97K-499-35_v1.0	Vu03	53969096	[G/A]	SNP	0.235	0.31	0.59	2.636	PASS	PASS
2_06222	Cowpea_IT97K-499-35_v1.0	Vu03	54078508	[A/C]	SNP	0.484	0.459	0.405	2.626	PASS	PASS
2_07926	Cowpea_IT97K-499-35_v1.0	Vu03	54172304	[G/A]	SNP	0.251	0.231	0.258	2.618	PASS	PASS
2_22306	Cowpea_IT97K-499-35_v1.0	Vu03	54263618	[C/A]	SNP	0.379	0.31	0.442	2.61	PASS	PASS
2_24025	Cowpea_IT97K-499-35_v1.0	Vu03	54365572	[T/C]	SNP	0.431	0.371	1.732	2.601	PASS	PASS
2_51775	Cowpea_IT97K-499-35_v1.0	Vu03	54521782	[C/A]	SNP	0.257	0.22	0.442	2.587	PASS	PASS
2_10751	Cowpea_IT97K-499-35_v1.0	Vu03	54610377	[C/T]	SNP	0.305	0.29	0.184	2.579	PASS	PASS
2_23808	Cowpea_IT97K-499-35_v1.0	Vu03	54865535	[T/C]	SNP	0.145	0.307	0.184	2.556	PASS	PASS
2_38519	Cowpea_IT97K-499-35_v1.0	Vu03	54967170	[A/T]	SNP	0.146	0.313	0.332	2.547	PASS	PASS
2_51479	Cowpea_IT97K-499-35_v1.0	Vu03	55088278	[T/C]	SNP	0.385	0.497	0.884	2.537	PASS	PASS
2_38802	Cowpea_IT97K-499-35_v1.0	Vu03	55373116	[C/A]	SNP	0.401	0.438	0.626	2.512	PASS	PASS
2_20403	Cowpea_IT97K-499-35_v1.0	Vu03	55495157	[A/G]	SNP	0.23	0.255	0.221	2.502	PASS	PASS
2_21026	Cowpea_IT97K-499-35_v1.0	Vu03	55587755	[T/C]	SNP	0.31	0.467	0.111	2.494	PASS	PASS
2_29607	Cowpea_IT97K-499-35_v1.0	Vu03	55685313	[A/C]	SNP	0.407	0.451	0.405	2.486	PASS	PASS
2_46210	Cowpea_IT97K-499-35_v1.0	Vu03	55793698	[T/C]	SNP	0.381	0.424	0.516	2.478	PASS	PASS
2_22445	Cowpea_IT97K-499-35_v1.0	Vu03	56327447	[G/A]	SNP	0.25	0.25	0.258	2.439	PASS	PASS
2_05694	Cowpea_IT97K-499-35_v1.0	Vu03	56421108	[T/C]	SNP	0.434	0.478	0.221	2.433	PASS	PASS
2_29134	Cowpea_IT97K-499-35_v1.0	Vu03	56521005	[A/G]	SNP	0.369	0.443	0.368	2.427	PASS	PASS
2_00122	Cowpea_IT97K-499-35_v1.0	Vu03	56623267	[G/A]	SNP	0.376	0.478	0.037	2.421	PASS	PASS
2_31407	Cowpea_IT97K-499-35_v1.0	Vu03	56722883	[G/A]	SNP	0.484	0.464	0.479	2.416	PASS	PASS
2_14474	Cowpea_IT97K-499-35_v1.0	Vu03	56820194	[G/A]	SNP	0.33	0.389	0.332	2.411	PASS	PASS
2_23837	Cowpea_IT97K-499-35_v1.0	Vu03	56931028	[A/G]	SNP	0.44	0.5	0.368	2.406	PASS	PASS
2_13427	Cowpea_IT97K-499-35_v1.0	Vu03	57031322	[A/G]	SNP	0.311	0.408	0.184	2.401	PASS	PASS
2_43512	Cowpea_IT97K-499-35_v1.0	Vu03	57135330	[T/C]	SNP	0.309	0.399	0.405	2.397	PASS	PASS
2_49762	Cowpea_IT97K-499-35_v1.0	Vu03	57591312	[G/T]	SNP	0.42	0.434	0.626	2.386	PASS	PASS
2_44743	Cowpea_IT97K-499-35_v1.0	Vu03	57716142	[T/C]	SNP	0.279	0.321	0.59	2.384	PASS	PASS
2_54958	Cowpea_IT97K-499-35_v1.0	Vu03	58184460	[C/A]	SNP	0.454	0.386	0.479	2.388	PASS	PASS
2_13013	Cowpea_IT97K-499-35_v1.0	Vu03	58294530	[C/A]	SNP	0.236	0.3	1.216	2.392	PASS	PASS
2_28024	Cowpea_IT97K-499-35_v1.0	Vu03	58398327	[A/C]	SNP	0.177	0.258	0.147	2.395	PASS	PASS
2_28028	Cowpea_IT97K-499-35_v1.0	Vu03	58710315	[T/C]	SNP	0.3	0.34	0.479	2.412	PASS	PASS
2_04680	Cowpea_IT97K-499-35_v1.0	Vu03	58818791	[G/T]	SNP	0.275	0.413	0.405	2.419	PASS	PASS
2_01862	Cowpea_IT97K-499-35_v1.0	Vu03	58931247	[A/C]	SNP	0.22	0.341	0.405	2.428	PASS	PASS
2_26929	Cowpea_IT97K-499-35_v1.0	Vu03	59031163	[C/T]	SNP	0.206	0.401	6.411	2.438	PASS	PASS
2_46657	Cowpea_IT97K-499-35_v1.0	Vu03	59154534	[T/A]	SNP	0.466	0.492	0.626	2.45	PASS	PASS
2_40553	Cowpea_IT97K-499-35_v1.0	Vu03	59262909	[T/C]	SNP	0.293	0.283	0.368	2.462	PASS	PASS
2_14417	Cowpea_IT97K-499-35_v1.0	Vu03	59355296	[T/G]	SNP	0.182	0.277	0.111	2.474	PASS	PASS
2_06600	Cowpea_IT97K-499-35_v1.0	Vu03	59448502	[T/C]	SNP	0.29	0.429	0.258	2.486	PASS	PASS
2_48474	Cowpea_IT97K-499-35_v1.0	Vu03	59551077	[A/G]	SNP	0.437	0.367	0.516	2.501	PASS	PASS
2_20900	Cowpea_IT97K-499-35_v1.0	Vu03	59641908	[A/C]	SNP	0.4	0.427	0.479	2.515	PASS	PASS
2_29854	Cowpea_IT97K-499-35_v1.0	Vu03	59735045	[T/C]	SNP	0.172	0.253	0.332	2.531	PASS	PASS
2_20800	Cowpea_IT97K-499-35_v1.0	Vu03	59859517	[C/T]	SNP	0.312	0.366	1.29	2.553	PASS	PASS
2_09738	Cowpea_IT97K-499-35_v1.0	Vu03	59948472	[C/T]	SNP	0.421	0.341	1.326	2.57	PASS	PASS
2_42945	Cowpea_IT97K-499-35_v1.0	Vu03	60036568	[T/C]	SNP	0.25	0.348	0.221	2.588	PASS	PASS
2_21304	Cowpea_IT97K-499-35_v1.0	Vu03	60125079	[A/G]	SNP	0.366	0.432	0.074	2.607	PASS	PASS
2_06984	Cowpea_IT97K-499-35_v1.0	Vu03	60220821	[G/A]	SNP	0.252	0.326	0.405	2.629	PASS	PASS
2_02668	Cowpea_IT97K-499-35_v1.0	Vu03	60472009	[G/A]	SNP	0.397	0.492	0.221	2.693	PASS	PASS
2_21264	Cowpea_IT97K-499-35_v1.0	Vu03	60695299	[C/T]	SNP	0.364	0.364	0.258	2.758	PASS	PASS
2_33258	Cowpea_IT97K-499-35_v1.0	Vu03	60777250	[C/G]	SNP	0.366	0.326	0.442	2.783	PASS	PASS
2_03725	Cowpea_IT97K-499-35_v1.0	Vu03	60860996	[C/A]	SNP	0.364	0.427	0.405	2.811	PASS	PASS
2_31142	Cowpea_IT97K-499-35_v1.0	Vu03	60941601	[G/A]	SNP	0.35	0.427	0.111	2.838	PASS	PASS
2_09897	Cowpea_IT97K-499-35_v1.0	Vu03	61022333	[C/T]	SNP	0.411	0.451	0.258	2.867	PASS	PASS
2_50627	Cowpea_IT97K-499-35_v1.0	Vu03	61102082	[C/T]	SNP	0.299	0.427	0.295	2.896	PASS	PASS
2_19403	Cowpea_IT97K-499-35_v1.0	Vu03	61222162	[A/G]	SNP	0.447	0.431	0.479	2.942	PASS	PASS
2_21061	Cowpea_IT97K-499-35_v1.0	Vu03	61313096	[G/A]	SNP	0.271	0.204	0.258	2.979	PASS	PASS
2_00569	Cowpea_IT97K-499-35_v1.0	Vu03	61390899	[T/C]	SNP	0.196	0.27	0.258	3.012	PASS	PASS
2_02141	Cowpea_IT97K-499-35_v1.0	Vu03	61469747	[T/G]	SNP	0.24	0.272	0.147	3.047	PASS	PASS
2_25694	Cowpea_IT97K-499-35_v1.0	Vu03	61568396	[T/G]	SNP	0.169	0.277	0.479	3.091	PASS	PASS
2_11859	Cowpea_IT97K-499-35_v1.0	Vu03	61643528	[T/C]	SNP	0.254	0.141	0.037	3.127	PASS	PASS
2_40586	Cowpea_IT97K-499-35_v1.0	Vu03	61720605	[T/C]	SNP	0.224	0.342	0.479	3.164	PASS	PASS
2_11405	Cowpea_IT97K-499-35_v1.0	Vu03	61794378	[A/G]	SNP	0.167	0.277	0.221	3.201	PASS	PASS
2_04047	Cowpea_IT97K-499-35_v1.0	Vu03	61866001	[C/T]	SNP	0.272	0.141	0.258	3.238	PASS	PASS
2_30056	Cowpea_IT97K-499-35_v1.0	Vu03	61945518	[G/A]	SNP	0.234	0.34	2.1	3.281	PASS	PASS
2_28747	Cowpea_IT97K-499-35_v1.0	Vu03	62030371	[C/T]	SNP	0.437	0.41	0.405	3.328	PASS	PASS
2_02923	Cowpea_IT97K-499-35_v1.0	Vu03	62107892	[C/T]	SNP	0.496	0.476	0.479	3.372	PASS	PASS
2_12122	Cowpea_IT97K-499-35_v1.0	Vu03	62238242	[G/T]	SNP	0.446	0.41	0.184	3.449	PASS	PASS
2_06136	Cowpea_IT97K-499-35_v1.0	Vu03	62434907	[C/A]	SNP	0.374	0.47	0.59	3.574	PASS	PASS
2_09040	Cowpea_IT97K-499-35_v1.0	Vu03	62507624	[T/C]	SNP	0.457	0.486	0.295	3.622	PASS	PASS
2_25055	Cowpea_IT97K-499-35_v1.0	Vu03	62580998	[G/A]	SNP	0.421	0.322	0.295	3.672	PASS	PASS
2_28395	Cowpea_IT97K-499-35_v1.0	Vu03	62656254	[G/A]	SNP	0.255	0.274	0.368	3.725	PASS	PASS
2_07918	Cowpea_IT97K-499-35_v1.0	Vu03	62890908	[C/A]	SNP	0.229	0.342	0.442	3.899	PASS	PASS
2_34228	Cowpea_IT97K-499-35_v1.0	Vu03	62949317	[C/G]	SNP	0.239	0.39	0.774	3.945	PASS	PASS
2_26773	Cowpea_IT97K-499-35_v1.0	Vu03	63206970	[A/G]	SNP	0.279	0.301	0.626	4.158	PASS	PASS
2_12723	Cowpea_IT97K-499-35_v1.0	Vu03	63269953	[A/C]	SNP	0.472	0.459	0.332	4.213	PASS	PASS
2_26891	Cowpea_IT97K-499-35_v1.0	Vu03	63334661	[G/T]	SNP	0.16	0.26	1.179	4.271	PASS	PASS
2_52577	Cowpea_IT97K-499-35_v1.0	Vu03	63390471	[G/A]	SNP	0.237	0.39	0.774	4.321	PASS	PASS
2_16530	Cowpea_IT97K-499-35_v1.0	Vu03	63508057	[G/T]	SNP	0.204	0.307	0.074	4.431	PASS	PASS
2_15487	Cowpea_IT97K-499-35_v1.0	Vu03	63583709	[C/A]	SNP	0.331	0.359	0.405	4.505	PASS	PASS
2_01375	Cowpea_IT97K-499-35_v1.0	Vu03	63659862	[A/C]	SNP	0.285	0.34	0.442	4.58	PASS	PASS
2_07076	Cowpea_IT97K-499-35_v1.0	Vu03	63722354	[T/G]	SNP	0.275	0.245	0.184	4.643	PASS	PASS
2_00846	Cowpea_IT97K-499-35_v1.0	Vu03	63803184	[A/G]	SNP	0.378	0.389	0.147	4.727	PASS	PASS
2_48250	Cowpea_IT97K-499-35_v1.0	Vu03	63861445	[T/C]	SNP	0.494	0.489	0.774	4.789	PASS	PASS
2_53966	Cowpea_IT97K-499-35_v1.0	Vu03	63914877	[A/G]	SNP	0.232	0.266	0.442	4.846	PASS	PASS
2_05319	Cowpea_IT97K-499-35_v1.0	Vu03	63969060	[G/A]	SNP	0.455	0.351	0.258	4.905	PASS	PASS
2_02817	Cowpea_IT97K-499-35_v1.0	Vu03	64017254	[G/T]	SNP	0.454	0.337	0.184	4.936	PASS	PASS
2_34086	Cowpea_IT97K-499-35_v1.0	Vu03	64065188	[G/C]	SNP	0.354	0.402	0.442	4.936	PASS	PASS
2_26337	Cowpea_IT97K-499-35_v1.0	Vu03	64121852	[C/T]	SNP	0.403	0.462	0.516	4.936	PASS	PASS
2_11107	Cowpea_IT97K-499-35_v1.0	Vu03	64242534	[A/G]	SNP	0.304	0.242	0.405	4.936	PASS	PASS
2_34733	Cowpea_IT97K-499-35_v1.0	Vu03	64310099	[G/C]	SNP	0.464	0.348	0.184	4.936	PASS	PASS
2_27481	Cowpea_IT97K-499-35_v1.0	Vu03	64419799	[T/C]	SNP	0.454	0.397	0.332	4.936	PASS	PASS
2_24679	Cowpea_IT97K-499-35_v1.0	Vu03	64482464	[T/C]	SNP	0.468	0.405	0.405	4.936	PASS	PASS
2_15991	Cowpea_IT97K-499-35_v1.0	Vu03	64530062	[C/T]	SNP	0.451	0.386	0.332	4.936	PASS	PASS
2_08343	Cowpea_IT97K-499-35_v1.0	Vu03	64588053	[A/G]	SNP	0.497	0.446	0.037	4.936	PASS	PASS
2_29325	Cowpea_IT97K-499-35_v1.0	Vu03	64635260	[A/G]	SNP	0.164	0.337	0.663	4.936	PASS	PASS
2_19626	Cowpea_IT97K-499-35_v1.0	Vu03	64709235	[C/T]	SNP	0.335	0.367	0.184	4.936	PASS	PASS
2_03385	Cowpea_IT97K-499-35_v1.0	Vu03	64804230	[G/A]	SNP	0.486	0.47	0.332	4.936	PASS	PASS
2_54912	Cowpea_IT97K-499-35_v1.0	Vu03	64853474	[C/A]	SNP	0.386	0.255	0.884	4.936	PASS	PASS
2_05632	Cowpea_IT97K-499-35_v1.0	Vu03	64934825	[A/G]	SNP	0.276	0.196	0.111	4.936	PASS	PASS
2_33446	Cowpea_IT97K-499-35_v1.0	Vu03	64983918	[C/G]	SNP	0.309	0.223	0.442	4.936	PASS	PASS
2_00276	Cowpea_IT97K-499-35_v1.0	Vu03	65040286	[C/T]	SNP	0.28	0.155	0.221	4.936	PASS	PASS
2_14003	Cowpea_IT97K-499-35_v1.0	Vu03	65086747	[C/A]	SNP	0.307	0.215	0	4.936	PASS	PASS
2_29962	Cowpea_IT97K-499-35_v1.0	Vu03	65133470	[G/T]	SNP	0.294	0.215	1.4	4.936	PASS	PASS
2_31563	Cowpea_IT97K-499-35_v1.0	Vu03	65185622	[C/T]	SNP	0.278	0.159	0.442	4.936	PASS	PASS
2_21403	Cowpea_IT97K-499-35_v1.0	Vu03	65242470	[G/A]	SNP	0.28	0.155	0.405	4.936	PASS	PASS
2_01807	Cowpea_IT97K-499-35_v1.0	Vu04	156259	[G/A]	SNP	0.129	0.147	0.332	6.522		PASS
2_19079	Cowpea_IT97K-499-35_v1.0	Vu04	351398	[G/A]	SNP	0.14	0.313	0.59	6.522	PASS	PASS
2_17284	Cowpea_IT97K-499-35_v1.0	Vu04	391975	[A/G]	SNP	0.148	0.291	0.332	6.522	PASS	PASS
2_22029	Cowpea_IT97K-499-35_v1.0	Vu04	428072	[A/G]	SNP	0.149	0.296	0.332	6.522	PASS	PASS
2_14368	Cowpea_IT97K-499-35_v1.0	Vu04	510984	[C/T]	SNP	0.264	0.25	0.037	6.522	PASS	PASS
2_31968	Cowpea_IT97K-499-35_v1.0	Vu04	551296	[C/T]	SNP	0.263	0.255	0.074	6.522	PASS	PASS
2_14555	Cowpea_IT97K-499-35_v1.0	Vu04	590084	[A/G]	SNP	0.242	0.264	0.258	6.522	PASS	PASS
2_01884	Cowpea_IT97K-499-35_v1.0	Vu04	631816	[A/G]	SNP	0.444	0.443	0.184	6.507	PASS	PASS
2_13446	Cowpea_IT97K-499-35_v1.0	Vu04	673517	[C/T]	SNP	0.488	0.451	0.037	6.475	PASS	PASS
2_31512	Cowpea_IT97K-499-35_v1.0	Vu04	721040	[A/C]	SNP	0.441	0.372	0.7	6.44	PASS	PASS
2_16849	Cowpea_IT97K-499-35_v1.0	Vu04	757547	[A/G]	SNP	0.455	0.405	0.405	6.413	PASS	PASS
2_22670	Cowpea_IT97K-499-35_v1.0	Vu04	801485	[A/G]	SNP	0.44	0.321	0	6.379	PASS	PASS
2_39050	Cowpea_IT97K-499-35_v1.0	Vu04	840664	[C/A]	SNP	0.27	0.447	7.296	6.35	PASS	PASS
2_31070	Cowpea_IT97K-499-35_v1.0	Vu04	891195	[A/G]	SNP	0.481	0.342	0.516	6.311	PASS	PASS
2_08519	Cowpea_IT97K-499-35_v1.0	Vu04	955534	[A/C]	SNP	0.38	0.497	0.111	6.262	PASS	PASS
2_51245	Cowpea_IT97K-499-35_v1.0	Vu04	1011957	[A/G]	SNP	0.269	0.273	1.142	6.218	PASS	PASS
2_21805	Cowpea_IT97K-499-35_v1.0	Vu04	1059313	[T/C]	SNP	0.367	0.332	0.074	6.181	PASS	PASS
2_18339	Cowpea_IT97K-499-35_v1.0	Vu04	1099683	[T/C]	SNP	0.493	0.495	0.368	6.15	PASS	PASS
2_12850	Cowpea_IT97K-499-35_v1.0	Vu04	1155766	[G/A]	SNP	0.301	0.413	0.147	6.106	PASS	PASS
2_14321	Cowpea_IT97K-499-35_v1.0	Vu04	1195272	[G/A]	SNP	0.244	0.378	0.442	6.075	PASS	PASS
2_53147	Cowpea_IT97K-499-35_v1.0	Vu04	1235204	[G/A]	SNP	0.335	0.489	0.184	6.044	PASS	PASS
2_18617	Cowpea_IT97K-499-35_v1.0	Vu04	1274572	[C/T]	SNP	0.253	0.386	0.479	6.013	PASS	PASS
2_47893	Cowpea_IT97K-499-35_v1.0	Vu04	1317503	[C/T]	SNP	0.323	0.492	1.253	5.979	PASS	PASS
2_33392	Cowpea_IT97K-499-35_v1.0	Vu04	1365001	[C/G]	SNP	0.259	0.416	0.368	5.941	PASS	PASS
2_09963	Cowpea_IT97K-499-35_v1.0	Vu04	1404425	[G/A]	SNP	0.258	0.42	2.579	5.91	PASS	PASS
2_03731	Cowpea_IT97K-499-35_v1.0	Vu04	1523144	[G/A]	SNP	0.463	0.408	0.147	5.815	PASS	PASS
2_09566	Cowpea_IT97K-499-35_v1.0	Vu04	1565331	[A/C]	SNP	0.319	0.299	0.7	5.781	PASS	PASS
2_20271	Cowpea_IT97K-499-35_v1.0	Vu04	1608085	[C/T]	SNP	0.328	0.459	0.221	5.747	PASS	PASS
2_23686	Cowpea_IT97K-499-35_v1.0	Vu04	1653339	[G/A]	SNP	0.303	0.429	0.405	5.71	PASS	PASS
2_05445	Cowpea_IT97K-499-35_v1.0	Vu04	1698194	[T/C]	SNP	0.308	0.448	0.368	5.674	PASS	PASS
2_19226	Cowpea_IT97K-499-35_v1.0	Vu04	1746113	[A/G]	SNP	0.231	0.367	0.626	5.635	PASS	PASS
2_01865	Cowpea_IT97K-499-35_v1.0	Vu04	1800241	[A/C]	SNP	0.463	0.467	0.221	5.592	PASS	PASS
2_47601	Cowpea_IT97K-499-35_v1.0	Vu04	1845594	[G/A]	SNP	0.327	0.342	0.332	5.555	PASS	PASS
2_27657	Cowpea_IT97K-499-35_v1.0	Vu04	1895281	[A/G]	SNP	0.257	0.302	9.58	5.515	PASS	PASS
2_03673	Cowpea_IT97K-499-35_v1.0	Vu04	1960899	[A/G]	SNP	0.487	0.393	0.258	5.461	PASS	PASS
2_31885	Cowpea_IT97K-499-35_v1.0	Vu04	2025317	[G/A]	SNP	0.497	0.489	0.368	5.409	PASS	PASS
2_07277	Cowpea_IT97K-499-35_v1.0	Vu04	2069135	[T/C]	SNP	0.314	0.418	0.037	5.373	PASS	PASS
2_48261	Cowpea_IT97K-499-35_v1.0	Vu04	2113151	[G/A]	SNP	0.265	0.417	3.353	5.337	PASS	PASS
2_54418	Cowpea_IT97K-499-35_v1.0	Vu04	2176252	[A/G]	SNP	0.278	0.41	0.184	5.286	PASS	PASS
2_00188	Cowpea_IT97K-499-35_v1.0	Vu04	2220918	[A/G]	SNP	0.496	0.337	0.516	5.25	PASS	PASS
2_08173	Cowpea_IT97K-499-35_v1.0	Vu04	2312502	[C/T]	SNP	0.257	0.232	0.405	5.175	PASS	PASS
2_44992	Cowpea_IT97K-499-35_v1.0	Vu04	2388611	[T/G]	SNP	0.375	0.456	0.7	5.113	PASS	PASS
2_53018	Cowpea_IT97K-499-35_v1.0	Vu04	2465448	[C/T]	SNP	0.481	0.37	0.368	5.051	PASS	PASS
2_00825	Cowpea_IT97K-499-35_v1.0	Vu04	2513188	[G/T]	SNP	0.294	0.383	0.111	5.012	PASS	PASS
2_04278	Cowpea_IT97K-499-35_v1.0	Vu04	2573227	[A/G]	SNP	0.401	0.413	0.295	4.963	PASS	PASS
2_07868	Cowpea_IT97K-499-35_v1.0	Vu04	2627414	[T/C]	SNP	0.338	0.397	0.295	4.919	PASS	PASS
2_12774	Cowpea_IT97K-499-35_v1.0	Vu04	2682108	[C/T]	SNP	0.267	0.337	0.184	4.875	PASS	PASS
2_17600	Cowpea_IT97K-499-35_v1.0	Vu04	2732179	[G/T]	SNP	0.331	0.239	0.258	4.834	PASS	PASS
2_55131	Cowpea_IT97K-499-35_v1.0	Vu04	2787794	[A/C]	SNP	0.318	0.434	0.405	4.789	PASS	PASS
2_30825	Cowpea_IT97K-499-35_v1.0	Vu04	2861102	[T/C]	SNP	0.215	0.257	0.479	4.73	PASS	PASS
2_22793	Cowpea_IT97K-499-35_v1.0	Vu04	2964978	[A/G]	SNP	0.4	0.421	0.184	4.646	PASS	PASS
2_17548	Cowpea_IT97K-499-35_v1.0	Vu04	3044040	[T/G]	SNP	0.097	0.253	0.479	4.583	PASS	PASS
2_41865	Cowpea_IT97K-499-35_v1.0	Vu04	3115813	[G/A]	SNP	0.478	0.348	1.179	4.525	PASS	PASS
2_09970	Cowpea_IT97K-499-35_v1.0	Vu04	3179499	[A/G]	SNP	0.354	0.253	0.037	4.475	PASS	PASS
2_16068	Cowpea_IT97K-499-35_v1.0	Vu04	3267097	[G/A]	SNP	0.258	0.239	0	4.405	PASS	PASS
2_10985	Cowpea_IT97K-499-35_v1.0	Vu04	3330551	[G/A]	SNP	0.433	0.481	0.59	4.355	PASS	PASS
2_02915	Cowpea_IT97K-499-35_v1.0	Vu04	3384344	[A/G]	SNP	0.182	0.331	0.258	4.312	PASS	PASS
2_02904	Cowpea_IT97K-499-35_v1.0	Vu04	3468504	[T/C]	SNP	0.322	0.364	0.074	4.246	PASS	PASS
2_52433	Cowpea_IT97K-499-35_v1.0	Vu04	3526019	[T/C]	SNP	0.161	0.291	0.332	4.201	PASS	PASS
2_50198	Cowpea_IT97K-499-35_v1.0	Vu04	3594734	[C/T]	SNP	0.284	0.448	0.147	4.147	PASS	PASS
2_15390	Cowpea_IT97K-499-35_v1.0	Vu04	3663799	[T/C]	SNP	0.281	0.277	0.184	4.094	PASS	PASS
2_46362	Cowpea_IT97K-499-35_v1.0	Vu04	3722489	[C/T]	SNP	0.319	0.275	9.838	4.048	PASS	PASS
2_22921	Cowpea_IT97K-499-35_v1.0	Vu04	3826427	[T/C]	SNP	0.251	0.246	0.553	3.968	PASS	PASS
2_45683	Cowpea_IT97K-499-35_v1.0	Vu04	3888104	[T/C]	SNP	0.37	0.457	0.184	3.921	PASS	PASS
2_01103	Cowpea_IT97K-499-35_v1.0	Vu04	3961076	[T/C]	SNP	0.304	0.37	0.147	3.865	PASS	PASS
2_49621	Cowpea_IT97K-499-35_v1.0	Vu04	4065346	[A/G]	SNP	0.381	0.37	2.1	3.786	PASS	PASS
2_30930	Cowpea_IT97K-499-35_v1.0	Vu04	4127983	[C/A]	SNP	0.384	0.374	0.479	3.739	PASS	PASS
2_49149	Cowpea_IT97K-499-35_v1.0	Vu04	4202792	[C/A]	SNP	0.403	0.385	0.553	3.683	PASS	PASS
2_21826	Cowpea_IT97K-499-35_v1.0	Vu04	4282351	[G/T]	SNP	0.378	0.38	0.037	3.624	PASS	PASS
2_47090	Cowpea_IT97K-499-35_v1.0	Vu04	4347906	[T/C]	SNP	0.291	0.261	1.511	3.576	PASS	PASS
2_55552	Cowpea_IT97K-499-35_v1.0	Vu04	4445292	[A/G]	SNP	0.46	0.478	0.442	3.505	PASS	PASS
2_52664	Cowpea_IT97K-499-35_v1.0	Vu04	4522849	[A/G]	SNP	0.345	0.372	0.59	3.448	PASS	PASS
2_15690	Cowpea_IT97K-499-35_v1.0	Vu04	4663706	[C/T]	SNP	0.316	0.236	0.037	3.347	PASS	PASS
2_28130	Cowpea_IT97K-499-35_v1.0	Vu04	4766057	[T/C]	SNP	0.115	0.27	1.4	3.274	PASS	PASS
2_48345	Cowpea_IT97K-499-35_v1.0	Vu04	4875062	[A/C]	SNP	0.378	0.38	0.884	3.198	PASS	PASS
2_04182	Cowpea_IT97K-499-35_v1.0	Vu04	5017231	[G/A]	SNP	0.403	0.438	0.921	3.099	PASS	PASS
2_28103	Cowpea_IT97K-499-35_v1.0	Vu04	5131967	[A/G]	SNP	0.48	0.484	0.663	3.021	PASS	PASS
2_27951	Cowpea_IT97K-499-35_v1.0	Vu04	5227422	[C/T]	SNP	0.475	0.424	0.258	2.956	PASS	PASS
2_40244	Cowpea_IT97K-499-35_v1.0	Vu04	5307765	[G/A]	SNP	0.487	0.492	0.774	2.902	PASS	PASS
2_01826	Cowpea_IT97K-499-35_v1.0	Vu04	5696590	[C/T]	SNP	0.349	0.345	0.074	2.65	PASS	PASS
2_45777	Cowpea_IT97K-499-35_v1.0	Vu04	5823371	[C/T]	SNP	0.314	0.228	0.553	2.57	PASS	PASS
2_55103	Cowpea_IT97K-499-35_v1.0	Vu04	5985216	[C/G]	SNP	0.366	0.458	4.164	2.47	PASS	PASS
2_00695	Cowpea_IT97K-499-35_v1.0	Vu04	6116037	[T/G]	SNP	0.428	0.489	0.295	2.391	PASS	PASS
2_45153	Cowpea_IT97K-499-35_v1.0	Vu04	6219779	[T/C]	SNP	0.392	0.41	0.442	2.33	PASS	PASS
2_30831	Cowpea_IT97K-499-35_v1.0	Vu04	6329917	[G/T]	SNP	0.261	0.313	0.479	2.265	PASS	PASS
2_00338	Cowpea_IT97K-499-35_v1.0	Vu04	6442854	[A/C]	SNP	0.364	0.378	0.368	2.2	PASS	PASS
2_49384	Cowpea_IT97K-499-35_v1.0	Vu04	6555820	[A/G]	SNP	0.446	0.384	6.301	2.136	PASS	PASS
2_25749	Cowpea_IT97K-499-35_v1.0	Vu04	6679759	[G/T]	SNP	0.457	0.394	5.822	2.067	PASS	PASS
2_04570	Cowpea_IT97K-499-35_v1.0	Vu04	6812969	[A/C]	SNP	0.358	0.389	0.295	1.995	PASS	PASS
2_54802	Cowpea_IT97K-499-35_v1.0	Vu04	6934354	[A/G]	SNP	0.447	0.44	1.069	1.93	PASS	PASS
2_21733	Cowpea_IT97K-499-35_v1.0	Vu04	7070270	[G/A]	SNP	0.208	0.265	1.621	1.859	PASS	PASS
2_26363	Cowpea_IT97K-499-35_v1.0	Vu04	7318058	[A/G]	SNP	0.209	0.266	0.147	1.734	PASS	PASS
2_03479	Cowpea_IT97K-499-35_v1.0	Vu04	7506145	[C/T]	SNP	0.463	0.435	0.332	1.643	PASS	PASS
2_46654	Cowpea_IT97K-499-35_v1.0	Vu04	7712996	[T/C]	SNP	0.286	0.303	0.516	1.546	PASS	PASS
2_40340	Cowpea_IT97K-499-35_v1.0	Vu04	8248370	[A/G]	SNP	0.276	0.302	1.363	1.312	PASS	PASS
2_10143	Cowpea_IT97K-499-35_v1.0	Vu04	8620229	[A/G]	SNP	0.206	0.25	0.442	1.164	PASS	PASS
2_39497	Cowpea_IT97K-499-35_v1.0	Vu04	8836530	[C/T]	SNP	0.342	0.363	0.479	1.083	PASS	PASS
2_00004	Cowpea_IT97K-499-35_v1.0	Vu04	9086821	[G/A]	SNP	0.307	0.322	0.332	0.994	PASS	PASS
2_51095	Cowpea_IT97K-499-35_v1.0	Vu04	9802650	[T/G]	SNP	0.37	0.423	0.995	0.766	PASS	PASS
2_41497	Cowpea_IT97K-499-35_v1.0	Vu04	10078138	[T/A]	SNP	0.206	0.267	3.058	0.689	PASS	PASS
2_48810	Cowpea_IT97K-499-35_v1.0	Vu04	10520447	[T/C]	SNP	0.205	0.265	0.626	0.577	PASS	PASS
2_51838	Cowpea_IT97K-499-35_v1.0	Vu04	10826439	[A/C]	SNP	0.284	0.298	0.59	0.507	PASS	PASS
2_38324	Cowpea_IT97K-499-35_v1.0	Vu04	11191092	[T/C]	SNP	0.338	0.383	0.884	0.431	PASS	PASS
2_41510	Cowpea_IT97K-499-35_v1.0	Vu04	11648120	[A/G]	SNP	0.431	0.457	0.442	0.349	PASS	PASS
2_50726	Cowpea_IT97K-499-35_v1.0	Vu04	12159878	[T/C]	SNP	0.276	0.277	0.995	0.27	PASS	PASS
2_42536	Cowpea_IT97K-499-35_v1.0	Vu04	12761687	[T/C]	SNP	0.372	0.313	0.147	0.196	PASS	PASS
2_52884	Cowpea_IT97K-499-35_v1.0	Vu04	14754076	[T/C]	SNP	0.356	0.348	0.958	0.066	PASS	PASS
2_48364	Cowpea_IT97K-499-35_v1.0	Vu04	16209529	[T/C]	SNP	0.273	0.303	2.616	0.053	PASS	PASS
2_51949	Cowpea_IT97K-499-35_v1.0	Vu04	17641694	[A/C]	SNP	0.326	0.341	0.995	0.084	PASS	PASS
2_10482	Cowpea_IT97K-499-35_v1.0	Vu04	18600545	[A/G]	SNP	0.296	0.37	0.516	0.121	PASS	PASS
2_45863	Cowpea_IT97K-499-35_v1.0	Vu04	19579221	[C/A]	SNP	0.334	0.333	0.553	0.165	PASS	PASS
2_48767	Cowpea_IT97K-499-35_v1.0	Vu04	20175959	[A/G]	SNP	0.473	0.413	7.296	0.194	PASS	PASS
2_45958	Cowpea_IT97K-499-35_v1.0	Vu04	20720703	[G/A]	SNP	0.444	0.376	2.248	0.221	PASS	PASS
2_42718	Cowpea_IT97K-499-35_v1.0	Vu04	22382698	[T/C]	SNP	0.39	0.355	3.906	0.304	PASS	PASS
2_01547	Cowpea_IT97K-499-35_v1.0	Vu04	23526573	[C/T]	SNP	0.307	0.359	2.358	0.359	PASS	PASS
2_12049	Cowpea_IT97K-499-35_v1.0	Vu04	24015514	[T/C]	SNP	0.451	0.383	0.442	0.382	PASS	PASS
2_41005	Cowpea_IT97K-499-35_v1.0	Vu04	24644815	[T/C]	SNP	0.255	0.291	0.7	0.41	PASS	PASS
2_44756	Cowpea_IT97K-499-35_v1.0	Vu04	25127550	[A/C]	SNP	0.453	0.486	1.769	0.432	PASS	PASS
2_00260	Cowpea_IT97K-499-35_v1.0	Vu04	25535427	[C/T]	SNP	0.222	0.266	0.184	0.451	PASS	PASS
2_38264	Cowpea_IT97K-499-35_v1.0	Vu04	25874974	[A/G]	SNP	0.245	0.252	2.506	0.466	PASS	PASS
2_41903	Cowpea_IT97K-499-35_v1.0	Vu04	26223984	[A/G]	SNP	0.386	0.495	0.479	0.482	PASS	PASS
2_48109	Cowpea_IT97K-499-35_v1.0	Vu04	26543830	[T/C]	SNP	0.425	0.486	0.59	0.497	PASS	PASS
2_42662	Cowpea_IT97K-499-35_v1.0	Vu04	26845720	[T/G]	SNP	0.268	0.302	0.258	0.512	PASS	PASS
2_10127	Cowpea_IT97K-499-35_v1.0	Vu04	27246896	[T/C]	SNP	0.473	0.489	0.516	0.532	PASS	PASS
2_01777	Cowpea_IT97K-499-35_v1.0	Vu04	27558626	[G/A]	SNP	0.262	0.255	0.221	0.548	PASS	PASS
2_53162	Cowpea_IT97K-499-35_v1.0	Vu04	27830044	[A/G]	SNP	0.219	0.291	0.111	0.563	PASS	PASS
2_41456	Cowpea_IT97K-499-35_v1.0	Vu04	28098176	[A/G]	SNP	0.162	0.259	8.769	0.579	PASS	PASS
2_49678	Cowpea_IT97K-499-35_v1.0	Vu04	28381498	[C/T]	SNP	0.191	0.261	0.405	0.596	PASS	PASS
2_37585	Cowpea_IT97K-499-35_v1.0	Vu04	28662834	[G/T]	SNP	0.335	0.27	0.7	0.614	PASS	PASS
2_04022	Cowpea_IT97K-499-35_v1.0	Vu04	28914902	[C/T]	SNP	0.416	0.386	0.442	0.632	PASS	PASS
2_51083	Cowpea_IT97K-499-35_v1.0	Vu04	29289066	[C/A]	SNP	0.259	0.258	5.564	0.659	PASS	PASS
2_43273	Cowpea_IT97K-499-35_v1.0	Vu04	29843196	[T/C]	SNP	0.463	0.44	0.442	0.705	PASS	PASS
2_42756	Cowpea_IT97K-499-35_v1.0	Vu04	30099112	[G/A]	SNP	0.251	0.126	7.811	0.728	PASS	PASS
2_19406	Cowpea_IT97K-499-35_v1.0	Vu04	30393024	[A/C]	SNP	0.481	0.418	0.368	0.757	PASS	PASS
2_22146	Cowpea_IT97K-499-35_v1.0	Vu04	30770562	[A/G]	SNP	0.423	0.486	0.147	0.797	PASS	PASS
2_45478	Cowpea_IT97K-499-35_v1.0	Vu04	31046124	[A/G]	SNP	0.493	0.473	0.332	0.83	PASS	PASS
2_52922	Cowpea_IT97K-499-35_v1.0	Vu04	31244315	[T/C]	SNP	0.375	0.408	0.332	0.854	PASS	PASS
2_08232	Cowpea_IT97K-499-35_v1.0	Vu04	31418364	[C/T]	SNP	0.199	0.261	0.037	0.877	PASS	PASS
2_27195	Cowpea_IT97K-499-35_v1.0	Vu04	31688686	[C/T]	SNP	0.498	0.478	0.553	0.915	PASS	PASS
2_44902	Cowpea_IT97K-499-35_v1.0	Vu04	31949462	[T/C]	SNP	0.378	0.296	0.479	0.954	PASS	PASS
2_46167	Cowpea_IT97K-499-35_v1.0	Vu04	32194505	[C/T]	SNP	0.324	0.438	0.442	0.993	PASS	PASS
2_52161	Cowpea_IT97K-499-35_v1.0	Vu04	32515416	[G/A]	SNP	0.276	0.443	0.516	1.049	PASS	PASS
2_45992	Cowpea_IT97K-499-35_v1.0	Vu04	32735480	[G/A]	SNP	0.106	0.251	0.811	1.09	PASS	PASS
2_02586	Cowpea_IT97K-499-35_v1.0	Vu04	33137562	[T/C]	SNP	0.427	0.37	0.147	1.17	PASS	PASS
2_49982	Cowpea_IT97K-499-35_v1.0	Vu04	33341890	[C/T]	SNP	0.375	0.388	0.59	1.215	PASS	PASS
2_53631	Cowpea_IT97K-499-35_v1.0	Vu04	33723047	[A/G]	SNP	0.383	0.41	0.405	1.304	PASS	PASS
2_10227	Cowpea_IT97K-499-35_v1.0	Vu04	33895376	[C/T]	SNP	0.497	0.298	0.921	1.347	PASS	PASS
2_49224	Cowpea_IT97K-499-35_v1.0	Vu04	34088694	[A/G]	SNP	0.438	0.389	0.184	1.398	PASS	PASS
2_01416	Cowpea_IT97K-499-35_v1.0	Vu04	34433265	[A/C]	SNP	0.372	0.279	0.958	1.495	PASS	PASS
2_42092	Cowpea_IT97K-499-35_v1.0	Vu04	34758983	[T/A]	SNP	0.288	0.281	4.274	1.594	PASS	PASS
2_38823	Cowpea_IT97K-499-35_v1.0	Vu04	34906817	[A/C]	SNP	0.219	0.431	4.274	1.641	PASS	PASS
2_55260	Cowpea_IT97K-499-35_v1.0	Vu04	35055527	[G/T]	SNP	0.365	0.198	1.179	1.69	PASS	PASS
2_40648	Cowpea_IT97K-499-35_v1.0	Vu04	35385975	[A/G]	SNP	0.488	0.389	4.09	1.806	PASS	PASS
2_39189	Cowpea_IT97K-499-35_v1.0	Vu04	35587637	[C/T]	SNP	0.234	0.25	5.343	1.881	PASS	PASS
2_02409	Cowpea_IT97K-499-35_v1.0	Vu04	35727790	[A/G]	SNP	0.425	0.404	0.774	1.935	PASS	PASS
2_20683	Cowpea_IT97K-499-35_v1.0	Vu04	35856482	[G/A]	SNP	0.4	0.492	0.147	1.987	PASS	PASS
2_04081	Cowpea_IT97K-499-35_v1.0	Vu04	36066951	[T/C]	SNP	0.123	0.326	8.917	2.073	PASS	PASS
2_08360	Cowpea_IT97K-499-35_v1.0	Vu04	36174705	[G/T]	SNP	0.269	0.16	0.442	2.119	PASS	PASS
2_21585	Cowpea_IT97K-499-35_v1.0	Vu04	36281096	[C/T]	SNP	0.09	0.291	0.479	2.166	PASS	PASS
2_08419	Cowpea_IT97K-499-35_v1.0	Vu04	36405010	[C/T]	SNP	0.457	0.389	0.295	2.221	PASS	PASS
2_25643	Cowpea_IT97K-499-35_v1.0	Vu04	36511701	[G/A]	SNP	0.32	0.484	0.626	2.27	PASS	PASS
2_20652	Cowpea_IT97K-499-35_v1.0	Vu04	36611928	[A/G]	SNP	0.409	0.429	0.295	2.317	PASS	PASS
2_21293	Cowpea_IT97K-499-35_v1.0	Vu04	36720223	[A/G]	SNP	0.446	0.484	0.737	2.369	PASS	PASS
2_03897	Cowpea_IT97K-499-35_v1.0	Vu04	36817378	[T/C]	SNP	0.392	0.323	2.248	2.416	PASS	PASS
2_33198	Cowpea_IT97K-499-35_v1.0	Vu04	36924277	[C/G]	SNP	0.42	0.438	0.184	2.469	PASS	PASS
2_10887	Cowpea_IT97K-499-35_v1.0	Vu04	37027544	[G/T]	SNP	0.187	0.313	0.368	2.522	PASS	PASS
1_0629	Cowpea_IT97K-499-35_v1.0	Vu04	37118905	[A/T]	SNP	0.224	0.37	0.074	2.569	PASS	PASS
2_09460	Cowpea_IT97K-499-35_v1.0	Vu04	37207247	[G/A]	SNP	0.319	0.451	0.147	2.615	PASS	PASS
2_43505	Cowpea_IT97K-499-35_v1.0	Vu04	37456184	[A/G]	SNP	0.182	0.149	31.982	2.751		FAIL
2_23336	Cowpea_IT97K-499-35_v1.0	Vu04	37747250	[C/T]	SNP	0.484	0.453	0.995	2.917	PASS	PASS
2_20961	Cowpea_IT97K-499-35_v1.0	Vu04	37825571	[A/C]	SNP	0.455	0.34	0.332	2.964	PASS	PASS
2_01060	Cowpea_IT97K-499-35_v1.0	Vu04	37902364	[C/A]	SNP	0.199	0.304	0.295	3.01	PASS	PASS
2_40965	Cowpea_IT97K-499-35_v1.0	Vu04	37980390	[T/C]	SNP	0.386	0.495	2.1	3.057	PASS	PASS
2_53566	Cowpea_IT97K-499-35_v1.0	Vu04	38076790	[A/C]	SNP	0.269	0.231	0.405	3.117	PASS	PASS
2_51619	Cowpea_IT97K-499-35_v1.0	Vu04	38194616	[C/T]	SNP	0.397	0.307	2.395	3.191	PASS	PASS
2_18697	Cowpea_IT97K-499-35_v1.0	Vu04	38338171	[G/A]	SNP	0.32	0.334	0.147	3.283	PASS	PASS
2_21137	Cowpea_IT97K-499-35_v1.0	Vu04	38669221	[C/A]	SNP	0.272	0.356	0.442	3.506	PASS	PASS
2_13744	Cowpea_IT97K-499-35_v1.0	Vu04	38745770	[C/A]	SNP	0.309	0.25	0.147	3.559	PASS	PASS
2_19949	Cowpea_IT97K-499-35_v1.0	Vu04	38831207	[G/A]	SNP	0.489	0.472	0.442	3.619	PASS	PASS
2_22386	Cowpea_IT97K-499-35_v1.0	Vu04	38924912	[A/G]	SNP	0.249	0.367	0	3.686	PASS	PASS
2_25413	Cowpea_IT97K-499-35_v1.0	Vu04	39072170	[A/C]	SNP	0.292	0.397	0.405	3.793	PASS	PASS
2_00429	Cowpea_IT97K-499-35_v1.0	Vu04	39229724	[C/A]	SNP	0.235	0.318	0.037	3.911	PASS	PASS
2_23110	Cowpea_IT97K-499-35_v1.0	Vu04	39289817	[G/A]	SNP	0.28	0.389	0.037	3.956	PASS	PASS
2_24694	Cowpea_IT97K-499-35_v1.0	Vu04	39540156	[A/C]	SNP	0.403	0.472	2.211	4.151	PASS	PASS
2_13239	Cowpea_IT97K-499-35_v1.0	Vu04	39613844	[T/C]	SNP	0.245	0.291	0.368	4.21	PASS	PASS
2_21666	Cowpea_IT97K-499-35_v1.0	Vu04	39837125	[A/G]	SNP	0.188	0.274	0.332	4.392	PASS	PASS
2_55309	Cowpea_IT97K-499-35_v1.0	Vu04	39890812	[T/G]	SNP	0.19	0.28	0.258	4.436	PASS	PASS
2_53669	Cowpea_IT97K-499-35_v1.0	Vu04	39943690	[T/C]	SNP	0.196	0.274	0.332	4.481	PASS	PASS
2_41081	Cowpea_IT97K-499-35_v1.0	Vu04	40027549	[G/A]	SNP	0.259	0.287	4.643	4.552	PASS	PASS
2_16297	Cowpea_IT97K-499-35_v1.0	Vu04	40182274	[T/C]	SNP	0.261	0.378	0.221	4.685	PASS	PASS
2_48029	Cowpea_IT97K-499-35_v1.0	Vu04	40241045	[A/G]	SNP	0.383	0.247	0.405	4.736	PASS	PASS
2_11787	Cowpea_IT97K-499-35_v1.0	Vu04	40320271	[G/A]	SNP	0.287	0.34	0.147	4.806	PASS	PASS
2_54563	Cowpea_IT97K-499-35_v1.0	Vu04	40375818	[T/C]	SNP	0.246	0.294	0.811	4.855	PASS	PASS
2_07846	Cowpea_IT97K-499-35_v1.0	Vu04	40422399	[A/G]	SNP	0.29	0.383	0.295	4.897	PASS	PASS
2_50822	Cowpea_IT97K-499-35_v1.0	Vu04	40470581	[T/C]	SNP	0.385	0.457	0.516	4.94	PASS	PASS
2_31932	Cowpea_IT97K-499-35_v1.0	Vu04	40516709	[C/T]	SNP	0.185	0.264	0.368	4.982	PASS	PASS
2_10351	Cowpea_IT97K-499-35_v1.0	Vu04	40581486	[T/C]	SNP	0.226	0.259	7.59	5.041	PASS	PASS
2_19973	Cowpea_IT97K-499-35_v1.0	Vu04	40670306	[T/C]	SNP	0.275	0.408	0.405	5.123	PASS	PASS
2_09538	Cowpea_IT97K-499-35_v1.0	Vu04	40817493	[A/G]	SNP	0.467	0.424	0.184	5.261	PASS	PASS
2_54921	Cowpea_IT97K-499-35_v1.0	Vu04	40862660	[C/T]	SNP	0.44	0.397	0.221	5.304	PASS	PASS
2_18391	Cowpea_IT97K-499-35_v1.0	Vu04	40921661	[A/C]	SNP	0.258	0.147	0.184	5.36	PASS	PASS
2_45179	Cowpea_IT97K-499-35_v1.0	Vu04	41157552	[C/A]	SNP	0.285	0.283	1.253	5.589	PASS	PASS
2_14022	Cowpea_IT97K-499-35_v1.0	Vu04	41205324	[A/G]	SNP	0.256	0.258	0.516	5.637	PASS	PASS
2_01776	Cowpea_IT97K-499-35_v1.0	Vu04	41251676	[C/T]	SNP	0.271	0.277	0.111	5.683	PASS	PASS
2_21230	Cowpea_IT97K-499-35_v1.0	Vu04	41292851	[T/C]	SNP	0.165	0.303	0.184	5.724	PASS	PASS
2_25232	Cowpea_IT97K-499-35_v1.0	Vu04	41569769	[G/A]	SNP	0.431	0.352	40.567	6.005		FAIL
2_06710	Cowpea_IT97K-499-35_v1.0	Vu04	41749777	[A/G]	SNP	0.326	0.168	0.368	6.193	PASS	PASS
2_05449	Cowpea_IT97K-499-35_v1.0	Vu04	41807738	[T/C]	SNP	0.488	0.432	0.295	6.254	PASS	PASS
2_54631	Cowpea_IT97K-499-35_v1.0	Vu04	41857507	[A/G]	SNP	0.297	0.185	0.59	6.307	PASS	PASS
2_19388	Cowpea_IT97K-499-35_v1.0	Vu04	41895493	[A/G]	SNP	0.421	0.344	0.147	6.348	PASS	PASS
2_22419	Cowpea_IT97K-499-35_v1.0	Vu04	41939430	[T/C]	SNP	0.408	0.326	0.516	6.395	PASS	PASS
2_29929	Cowpea_IT97K-499-35_v1.0	Vu04	41988099	[G/T]	SNP	0.255	0.198	0.442	6.447	PASS	PASS
2_15343	Cowpea_IT97K-499-35_v1.0	Vu04	42028007	[C/T]	SNP	0.232	0.302	0.184	6.49	PASS	PASS
2_31667	Cowpea_IT97K-499-35_v1.0	Vu04	42123661	[G/A]	SNP	0.323	0.37	0.626	6.594	PASS	PASS
2_24291	Cowpea_IT97K-499-35_v1.0	Vu04	42181707	[A/G]	SNP	0.339	0.228	0.111	6.658	PASS	PASS
2_10162	Cowpea_IT97K-499-35_v1.0	Vu04	42226859	[G/T]	SNP	0.372	0.423	0.111	6.707	PASS	PASS
2_32586	Cowpea_IT97K-499-35_v1.0	Vu04	42263503	[C/G]	SNP	0.404	0.402	0.737	6.748	PASS	PASS
2_50135	Cowpea_IT97K-499-35_v1.0	Vu04	42362418	[C/T]	SNP	0.352	0.307	1.363	6.858	PASS	PASS
2_02787	Cowpea_IT97K-499-35_v1.0	Vu04	42482301	[T/C]	SNP	0.219	0.272	0.368	6.887	PASS	PASS
2_21108	Cowpea_IT97K-499-35_v1.0	Vu04	42555590	[T/C]	SNP	0.211	0.31	0.221	6.887	PASS	PASS
2_17847	Cowpea_IT97K-499-35_v1.0	Vu05	216823	[G/A]	SNP	0.304	0.217	0.442	4.471	PASS	PASS
2_24585	Cowpea_IT97K-499-35_v1.0	Vu05	273190	[A/G]	SNP	0.348	0.285	0.442	4.471	PASS	PASS
2_11663	Cowpea_IT97K-499-35_v1.0	Vu05	367363	[G/A]	SNP	0.389	0.495	0.147	4.471	PASS	PASS
2_25153	Cowpea_IT97K-499-35_v1.0	Vu05	418541	[T/C]	SNP	0.427	0.476	0.295	4.471	PASS	PASS
2_20376	Cowpea_IT97K-499-35_v1.0	Vu05	473387	[T/C]	SNP	0.422	0.465	0.074	4.471	PASS	PASS
2_46616	Cowpea_IT97K-499-35_v1.0	Vu05	553887	[G/T]	SNP	0.265	0.352	3.464	4.465	PASS	PASS
2_06641	Cowpea_IT97K-499-35_v1.0	Vu05	623635	[G/A]	SNP	0.477	0.435	0.405	4.455	PASS	PASS
2_21129	Cowpea_IT97K-499-35_v1.0	Vu05	675739	[A/C]	SNP	0.428	0.454	0.147	4.447	PASS	PASS
2_12640	Cowpea_IT97K-499-35_v1.0	Vu05	730565	[T/C]	SNP	0.331	0.348	0.332	4.438	PASS	PASS
2_39793	Cowpea_IT97K-499-35_v1.0	Vu05	796313	[A/G]	SNP	0.324	0.37	0.147	4.427	PASS	PASS
2_26719	Cowpea_IT97K-499-35_v1.0	Vu05	854223	[A/G]	SNP	0.221	0.293	0.442	4.417	PASS	PASS
2_05715	Cowpea_IT97K-499-35_v1.0	Vu05	908789	[G/A]	SNP	0.445	0.383	0.074	4.407	PASS	PASS
2_13199	Cowpea_IT97K-499-35_v1.0	Vu05	962332	[G/A]	SNP	0.25	0.299	0.258	4.397	PASS	PASS
2_25673	Cowpea_IT97K-499-35_v1.0	Vu05	1032628	[T/C]	SNP	0.31	0.16	0.368	4.384	PASS	PASS
2_01720	Cowpea_IT97K-499-35_v1.0	Vu05	1094623	[A/G]	SNP	0.488	0.326	0.184	4.372	PASS	PASS
2_12453	Cowpea_IT97K-499-35_v1.0	Vu05	1155053	[G/A]	SNP	0.22	0.288	0.258	4.36	PASS	PASS
2_09089	Cowpea_IT97K-499-35_v1.0	Vu05	1210456	[G/A]	SNP	0.248	0.302	0.221	4.349	PASS	PASS
2_07333	Cowpea_IT97K-499-35_v1.0	Vu05	1265529	[A/G]	SNP	0.27	0.345	0.811	4.337	PASS	PASS
2_12897	Cowpea_IT97K-499-35_v1.0	Vu05	1389690	[A/C]	SNP	0.398	0.399	0.184	4.311	PASS	PASS
2_34675	Cowpea_IT97K-499-35_v1.0	Vu05	1445485	[T/A]	SNP	0.258	0.261	0.479	4.299	PASS	PASS
2_11774	Cowpea_IT97K-499-35_v1.0	Vu05	1498917	[C/T]	SNP	0.332	0.302	0.332	4.287	PASS	PASS
2_02463	Cowpea_IT97K-499-35_v1.0	Vu05	1565427	[G/A]	SNP	0.274	0.269	0.111	4.272	PASS	PASS
2_15462	Cowpea_IT97K-499-35_v1.0	Vu05	1623936	[T/C]	SNP	0.338	0.345	0.147	4.258	PASS	PASS
2_12440	Cowpea_IT97K-499-35_v1.0	Vu05	1687011	[G/A]	SNP	0.364	0.359	0.479	4.244	PASS	PASS
2_05881	Cowpea_IT97K-499-35_v1.0	Vu05	1754782	[T/C]	SNP	0.426	0.454	0.332	4.228	PASS	PASS
2_23455	Cowpea_IT97K-499-35_v1.0	Vu05	1841588	[A/G]	SNP	0.49	0.38	0.295	4.206	PASS	PASS
2_44970	Cowpea_IT97K-499-35_v1.0	Vu05	1900031	[C/T]	SNP	0.175	0.315	0.111	4.192	PASS	PASS
2_26253	Cowpea_IT97K-499-35_v1.0	Vu05	1954620	[C/A]	SNP	0.407	0.386	0.553	4.178	PASS	PASS
2_18628	Cowpea_IT97K-499-35_v1.0	Vu05	2017086	[T/C]	SNP	0.394	0.489	0.221	4.163	PASS	PASS
2_42521	Cowpea_IT97K-499-35_v1.0	Vu05	2081955	[T/C]	SNP	0.414	0.399	4.569	4.146	PASS	PASS
2_05855	Cowpea_IT97K-499-35_v1.0	Vu05	2153625	[C/T]	SNP	0.434	0.478	0.221	4.128	PASS	PASS
2_17462	Cowpea_IT97K-499-35_v1.0	Vu05	2217509	[T/C]	SNP	0.406	0.492	0.184	4.111	PASS	PASS
2_32022	Cowpea_IT97K-499-35_v1.0	Vu05	2281776	[A/G]	SNP	0.203	0.35	1.842	4.094	PASS	PASS
2_24186	Cowpea_IT97K-499-35_v1.0	Vu05	2341132	[C/A]	SNP	0.317	0.424	0.368	4.078	PASS	PASS
2_12115	Cowpea_IT97K-499-35_v1.0	Vu05	2403253	[C/T]	SNP	0.389	0.492	0.553	4.061	PASS	PASS
2_00603	Cowpea_IT97K-499-35_v1.0	Vu05	2506702	[A/C]	SNP	0.405	0.364	0	4.033	PASS	PASS
2_01025	Cowpea_IT97K-499-35_v1.0	Vu05	2581169	[T/C]	SNP	0.431	0.459	0.147	4.012	PASS	PASS
2_34048	Cowpea_IT97K-499-35_v1.0	Vu05	2665433	[G/C]	SNP	0.319	0.288	0.7	3.988	PASS	PASS
2_46689	Cowpea_IT97K-499-35_v1.0	Vu05	2739692	[C/T]	SNP	0.442	0.41	9.322	3.967	PASS	PASS
2_15524	Cowpea_IT97K-499-35_v1.0	Vu05	2804555	[T/C]	SNP	0.463	0.448	0.368	3.949	PASS	PASS
2_04768	Cowpea_IT97K-499-35_v1.0	Vu05	2969747	[T/C]	SNP	0.448	0.307	0.147	3.901	PASS	PASS
2_04598	Cowpea_IT97K-499-35_v1.0	Vu05	3029049	[C/T]	SNP	0.452	0.367	0.332	3.884	PASS	PASS
2_19309	Cowpea_IT97K-499-35_v1.0	Vu05	3104538	[C/T]	SNP	0.488	0.372	0.147	3.862	PASS	PASS
2_15182	Cowpea_IT97K-499-35_v1.0	Vu05	3225877	[T/C]	SNP	0.444	0.38	0.111	3.826	PASS	PASS
2_15914	Cowpea_IT97K-499-35_v1.0	Vu05	3582244	[T/C]	SNP	0.158	0.144	0.442	3.719		PASS
2_19601	Cowpea_IT97K-499-35_v1.0	Vu05	3802677	[G/A]	SNP	0.261	0.262	0.479	3.652	PASS	PASS
2_31852	Cowpea_IT97K-499-35_v1.0	Vu05	3986365	[G/T]	SNP	0.38	0.467	0.295	3.595	PASS	PASS
2_44129	Cowpea_IT97K-499-35_v1.0	Vu05	4093376	[T/C]	SNP	0.41	0.274	0.479	3.562	PASS	PASS
2_16148	Cowpea_IT97K-499-35_v1.0	Vu05	4172511	[T/C]	SNP	0.368	0.277	0.258	3.537	PASS	PASS
2_23113	Cowpea_IT97K-499-35_v1.0	Vu05	4261655	[G/T]	SNP	0.254	0.405	0.221	3.51	PASS	PASS
2_54018	Cowpea_IT97K-499-35_v1.0	Vu05	4327670	[A/G]	SNP	0.229	0.427	0.295	3.489	PASS	PASS
2_55353	Cowpea_IT97K-499-35_v1.0	Vu05	4402244	[T/G]	SNP	0.122	0.29	0.479	3.466	PASS	PASS
2_00867	Cowpea_IT97K-499-35_v1.0	Vu05	4488638	[G/T]	SNP	0.273	0.435	0.295	3.439	PASS	PASS
2_19806	Cowpea_IT97K-499-35_v1.0	Vu05	4591975	[C/A]	SNP	0.271	0.285	0.258	3.407	PASS	PASS
2_16833	Cowpea_IT97K-499-35_v1.0	Vu05	4661053	[T/C]	SNP	0.359	0.255	0.074	3.385	PASS	PASS
2_11170	Cowpea_IT97K-499-35_v1.0	Vu05	4740667	[T/C]	SNP	0.383	0.351	0.147	3.36	PASS	PASS
2_03774	Cowpea_IT97K-499-35_v1.0	Vu05	4861405	[C/A]	SNP	0.197	0.313	0.442	3.323	PASS	PASS
2_11619	Cowpea_IT97K-499-35_v1.0	Vu05	4938681	[C/T]	SNP	0.33	0.465	0.479	3.299	PASS	PASS
2_06164	Cowpea_IT97K-499-35_v1.0	Vu05	5012695	[A/G]	SNP	0.324	0.497	0.184	3.276	PASS	PASS
2_19156	Cowpea_IT97K-499-35_v1.0	Vu05	5220411	[G/A]	SNP	0.493	0.408	0.184	3.211	PASS	PASS
2_10267	Cowpea_IT97K-499-35_v1.0	Vu05	5306874	[T/C]	SNP	0.281	0.397	0.074	3.185	PASS	PASS
2_04175	Cowpea_IT97K-499-35_v1.0	Vu05	5477196	[G/A]	SNP	0.259	0.228	0.295	3.132	PASS	PASS
2_16031	Cowpea_IT97K-499-35_v1.0	Vu05	5646894	[T/C]	SNP	0.489	0.497	0.111	3.08	PASS	PASS
2_51843	Cowpea_IT97K-499-35_v1.0	Vu05	5748926	[A/G]	SNP	0.385	0.303	0.405	3.049	PASS	PASS
2_20979	Cowpea_IT97K-499-35_v1.0	Vu05	5935510	[T/C]	SNP	0.344	0.334	0.074	2.992	PASS	PASS
2_29582	Cowpea_IT97K-499-35_v1.0	Vu05	6367177	[A/G]	SNP	0.073	0.207	0.405	2.863		FAIL
2_55000	Cowpea_IT97K-499-35_v1.0	Vu05	6675173	[A/G]	SNP	0.477	0.43	4.09	2.773	PASS	PASS
2_43366	Cowpea_IT97K-499-35_v1.0	Vu05	6764742	[T/C]	SNP	0.49	0.42	2.948	2.747	PASS	PASS
2_12002	Cowpea_IT97K-499-35_v1.0	Vu05	6936306	[C/T]	SNP	0.265	0.231	0.221	2.698	PASS	PASS
2_52707	Cowpea_IT97K-499-35_v1.0	Vu05	7085705	[T/C]	SNP	0.315	0.235	4.937	2.656	PASS	PASS
2_10000	Cowpea_IT97K-499-35_v1.0	Vu05	7189080	[C/A]	SNP	0.292	0.225	0.737	2.626	PASS	PASS
2_22107	Cowpea_IT97K-499-35_v1.0	Vu05	7321461	[A/G]	SNP	0.282	0.215	0.811	2.59	PASS	PASS
2_52506	Cowpea_IT97K-499-35_v1.0	Vu05	7449952	[T/C]	SNP	0.296	0.201	1.105	2.554	PASS	PASS
2_02309	Cowpea_IT97K-499-35_v1.0	Vu05	7551754	[A/G]	SNP	0.424	0.315	0.295	2.526	PASS	PASS
2_34653	Cowpea_IT97K-499-35_v1.0	Vu05	7969047	[G/C]	SNP	0.268	0.258	1.584	2.414	PASS	PASS
2_20907	Cowpea_IT97K-499-35_v1.0	Vu05	8406775	[C/T]	SNP	0.208	0.325	0.479	2.301	PASS	PASS
2_08563	Cowpea_IT97K-499-35_v1.0	Vu05	8524372	[G/A]	SNP	0.35	0.492	0.332	2.272	PASS	PASS
2_52835	Cowpea_IT97K-499-35_v1.0	Vu05	8627460	[A/G]	SNP	0.263	0.29	0.442	2.246	PASS	PASS
2_47345	Cowpea_IT97K-499-35_v1.0	Vu05	8734325	[A/G]	SNP	0.341	0.322	2.837	2.22	PASS	PASS
2_15115	Cowpea_IT97K-499-35_v1.0	Vu05	8868121	[G/A]	SNP	0.427	0.435	0.368	2.187	PASS	PASS
2_00804	Cowpea_IT97K-499-35_v1.0	Vu05	8982349	[A/G]	SNP	0.264	0.212	0.368	2.16	PASS	PASS
2_51294	Cowpea_IT97K-499-35_v1.0	Vu05	9096840	[A/C]	SNP	0.333	0.361	0.332	2.133	PASS	PASS
2_04903	Cowpea_IT97K-499-35_v1.0	Vu05	9238484	[T/G]	SNP	0.456	0.348	0.553	2.099	PASS	PASS
2_19538	Cowpea_IT97K-499-35_v1.0	Vu05	9351749	[C/A]	SNP	0.068	0.274	0.184	2.073	PASS	PASS
2_21620	Cowpea_IT97K-499-35_v1.0	Vu05	9478199	[C/A]	SNP	0.247	0.342	0.332	2.044	PASS	PASS
2_02123	Cowpea_IT97K-499-35_v1.0	Vu05	9616142	[G/A]	SNP	0.46	0.443	0.295	2.013	PASS	PASS
2_54244	Cowpea_IT97K-499-35_v1.0	Vu05	9738104	[A/G]	SNP	0.393	0.351	1.326	1.986	PASS	PASS
2_07699	Cowpea_IT97K-499-35_v1.0	Vu05	9859060	[G/A]	SNP	0.257	0.231	0.221	1.96	PASS	PASS
2_04365	Cowpea_IT97K-499-35_v1.0	Vu05	9992183	[G/T]	SNP	0.239	0.342	0.479	1.931	PASS	PASS
2_54237	Cowpea_IT97K-499-35_v1.0	Vu05	10138811	[C/T]	SNP	0.094	0.253	0.553	1.9	PASS	PASS
2_04452	Cowpea_IT97K-499-35_v1.0	Vu05	10264881	[G/A]	SNP	0.471	0.459	0.074	1.873	PASS	PASS
2_46493	Cowpea_IT97K-499-35_v1.0	Vu05	10399045	[T/C]	SNP	0.285	0.204	0.074	1.846	PASS	PASS
2_14156	Cowpea_IT97K-499-35_v1.0	Vu05	10529011	[A/G]	SNP	0.267	0.217	0.368	1.819	PASS	PASS
2_23688	Cowpea_IT97K-499-35_v1.0	Vu05	10705711	[G/A]	SNP	0.397	0.438	0.405	1.784	PASS	PASS
2_29781	Cowpea_IT97K-499-35_v1.0	Vu05	11036156	[C/T]	SNP	0.458	0.402	0.553	1.719	PASS	PASS
2_01158	Cowpea_IT97K-499-35_v1.0	Vu05	11183024	[T/C]	SNP	0.357	0.307	0.074	1.692	PASS	PASS
2_31770	Cowpea_IT97K-499-35_v1.0	Vu05	11563208	[A/G]	SNP	0.254	0.306	0.7	1.622	PASS	PASS
2_39874	Cowpea_IT97K-499-35_v1.0	Vu05	11763131	[A/G]	SNP	0.425	0.342	0.405	1.586	PASS	PASS
2_45157	Cowpea_IT97K-499-35_v1.0	Vu05	11919714	[T/G]	SNP	0.403	0.38	0.111	1.559	PASS	PASS
2_03362	Cowpea_IT97K-499-35_v1.0	Vu05	12116806	[A/G]	SNP	0.358	0.309	0.921	1.526	PASS	PASS
2_18257	Cowpea_IT97K-499-35_v1.0	Vu05	12293139	[G/A]	SNP	0.45	0.375	0.368	1.496	PASS	PASS
2_48541	Cowpea_IT97K-499-35_v1.0	Vu05	12458506	[T/C]	SNP	0.17	0.331	2.542	1.469	PASS	PASS
2_46385	Cowpea_IT97K-499-35_v1.0	Vu05	13274864	[G/T]	SNP	0.114	0.171	0.184	1.343		FAIL
2_42402	Cowpea_IT97K-499-35_v1.0	Vu05	13814610	[A/G]	SNP	0.129	0.264	0.663	1.265	PASS	PASS
2_52943	Cowpea_IT97K-499-35_v1.0	Vu05	14472003	[C/T]	SNP	0.273	0.269	0.442	1.175	PASS	PASS
2_13195	Cowpea_IT97K-499-35_v1.0	Vu05	14715253	[G/A]	SNP	0.287	0.296	0	1.143	PASS	PASS
2_06182	Cowpea_IT97K-499-35_v1.0	Vu05	14922735	[A/G]	SNP	0.266	0.261	0.184	1.116	PASS	PASS
2_13102	Cowpea_IT97K-499-35_v1.0	Vu05	15133585	[C/A]	SNP	0.458	0.329	0.147	1.09	PASS	PASS
2_40469	Cowpea_IT97K-499-35_v1.0	Vu05	15369113	[T/C]	SNP	0.44	0.399	1.584	1.061	PASS	PASS
2_24485	Cowpea_IT97K-499-35_v1.0	Vu05	15741667	[G/T]	SNP	0.082	0.25	2.063	1.015	PASS	PASS
2_29123	Cowpea_IT97K-499-35_v1.0	Vu05	15983742	[C/T]	SNP	0.192	0.261	0.442	0.987	PASS	PASS
2_45953	Cowpea_IT97K-499-35_v1.0	Vu05	16221564	[T/C]	SNP	0.079	0.26	0.405	0.959	PASS	PASS
2_51892	Cowpea_IT97K-499-35_v1.0	Vu05	17535815	[G/A]	SNP	0.263	0.313	0.59	0.811	PASS	PASS
2_39143	Cowpea_IT97K-499-35_v1.0	Vu05	18278793	[C/T]	SNP	0.28	0.271	1.142	0.731	PASS	PASS
2_37723	Cowpea_IT97K-499-35_v1.0	Vu05	19120614	[C/T]	SNP	0.17	0.35	0.737	0.642	PASS	PASS
2_38198	Cowpea_IT97K-499-35_v1.0	Vu05	19510991	[A/G]	SNP	0.164	0.342	0.332	0.602	PASS	PASS
2_44636	Cowpea_IT97K-499-35_v1.0	Vu05	19777928	[A/C]	SNP	0.46	0.257	5.453	0.575	PASS	PASS
2_39090	Cowpea_IT97K-499-35_v1.0	Vu05	20365450	[T/C]	SNP	0.487	0.386	0.479	0.516	PASS	PASS
2_37464	Cowpea_IT97K-499-35_v1.0	Vu05	20680067	[T/C]	SNP	0.498	0.401	0.59	0.485	PASS	PASS
2_46357	Cowpea_IT97K-499-35_v1.0	Vu05	21043122	[T/G]	SNP	0.482	0.382	0.626	0.449	PASS	PASS
2_08206	Cowpea_IT97K-499-35_v1.0	Vu05	21432079	[A/G]	SNP	0.458	0.332	0.295	0.412	PASS	PASS
2_43998	Cowpea_IT97K-499-35_v1.0	Vu05	21849166	[A/C]	SNP	0.322	0.19	1.437	0.373	PASS	PASS
2_50607	Cowpea_IT97K-499-35_v1.0	Vu05	22368770	[A/G]	SNP	0.273	0.196	0.516	0.326	PASS	PASS
2_32917	Cowpea_IT97K-499-35_v1.0	Vu05	23124658	[T/A]	SNP	0.36	0.451	0.553	0.261	PASS	PASS
2_40617	Cowpea_IT97K-499-35_v1.0	Vu05	23704066	[C/T]	SNP	0.156	0.357	1.326	0.216	PASS	PASS
2_32944	Cowpea_IT97K-499-35_v1.0	Vu05	24407027	[G/C]	SNP	0.355	0.481	0.442	0.166	PASS	PASS
2_54279	Cowpea_IT97K-499-35_v1.0	Vu05	25796460	[G/A]	SNP	0.157	0.353	0.442	0.092	PASS	PASS
2_45888	Cowpea_IT97K-499-35_v1.0	Vu05	27539499	[G/A]	SNP	0.159	0.353	1.879	0.059	PASS	PASS
2_38620	Cowpea_IT97K-499-35_v1.0	Vu05	28847367	[C/T]	SNP	0.353	0.326	0.479	0.091	PASS	PASS
2_39117	Cowpea_IT97K-499-35_v1.0	Vu05	30008724	[T/G]	SNP	0.328	0.217	1.253	0.168	PASS	PASS
2_42643	Cowpea_IT97K-499-35_v1.0	Vu05	30781803	[T/C]	SNP	0.433	0.274	2.248	0.247	PASS	PASS
2_39510	Cowpea_IT97K-499-35_v1.0	Vu05	31429261	[A/G]	SNP	0.467	0.281	1.548	0.332	PASS	PASS
2_50651	Cowpea_IT97K-499-35_v1.0	Vu05	31924727	[C/T]	SNP	0.37	0.237	1.253	0.408	PASS	PASS
2_48439	Cowpea_IT97K-499-35_v1.0	Vu05	32298097	[T/C]	SNP	0.198	0.38	0.626	0.471	PASS	PASS
2_42130	Cowpea_IT97K-499-35_v1.0	Vu05	32618363	[A/G]	SNP	0.211	0.399	0.811	0.53	PASS	PASS
2_39944	Cowpea_IT97K-499-35_v1.0	Vu05	32885664	[C/G]	SNP	0.205	0.383	0.847	0.583	PASS	PASS
2_37808	Cowpea_IT97K-499-35_v1.0	Vu05	33273828	[A/C]	SNP	0.2	0.383	0.221	0.663	PASS	PASS
2_51837	Cowpea_IT97K-499-35_v1.0	Vu05	33504288	[G/A]	SNP	0.447	0.367	0.59	0.714	PASS	PASS
2_42080	Cowpea_IT97K-499-35_v1.0	Vu05	33725758	[C/T]	SNP	0.212	0.415	5.343	0.764	PASS	PASS
2_07519	Cowpea_IT97K-499-35_v1.0	Vu05	33921436	[G/A]	SNP	0.472	0.465	0.405	0.81	PASS	PASS
2_48800	Cowpea_IT97K-499-35_v1.0	Vu05	34150127	[A/C]	SNP	0.374	0.495	1.805	0.866	PASS	PASS
2_51713	Cowpea_IT97K-499-35_v1.0	Vu05	34287957	[G/T]	SNP	0.28	0.467	0.479	0.9	PASS	PASS
2_43804	Cowpea_IT97K-499-35_v1.0	Vu05	34567067	[A/G]	SNP	0.363	0.478	0.626	0.972	PASS	PASS
2_54428	Cowpea_IT97K-499-35_v1.0	Vu05	34924743	[A/G]	SNP	0.362	0.454	0.442	1.067	PASS	PASS
2_25057	Cowpea_IT97K-499-35_v1.0	Vu05	35133342	[G/A]	SNP	0.264	0.185	0.516	1.124	PASS	PASS
2_05421	Cowpea_IT97K-499-35_v1.0	Vu05	35332832	[C/A]	SNP	0.28	0.19	0.111	1.18	PASS	PASS
2_27772	Cowpea_IT97K-499-35_v1.0	Vu05	35534773	[G/A]	SNP	0.465	0.38	0.221	1.238	PASS	PASS
2_32315	Cowpea_IT97K-499-35_v1.0	Vu05	35714146	[A/G]	SNP	0.407	0.301	2.616	1.29	PASS	PASS
2_30090	Cowpea_IT97K-499-35_v1.0	Vu05	35892596	[T/C]	SNP	0.442	0.429	0.553	1.342	PASS	PASS
2_32491	Cowpea_IT97K-499-35_v1.0	Vu05	36133941	[C/G]	SNP	0.291	0.264	0.368	1.415	PASS	PASS
2_43247	Cowpea_IT97K-499-35_v1.0	Vu05	36691363	[A/G]	SNP	0.466	0.426	0.553	1.587	PASS	PASS
2_05624	Cowpea_IT97K-499-35_v1.0	Vu05	36936755	[C/T]	SNP	0.436	0.473	0.405	1.665	PASS	PASS
2_33880	Cowpea_IT97K-499-35_v1.0	Vu05	37203358	[G/C]	SNP	0.43	0.415	0.811	1.75	PASS	PASS
2_33572	Cowpea_IT97K-499-35_v1.0	Vu05	37331322	[A/T]	SNP	0.448	0.342	0.221	1.791	PASS	PASS
2_32976	Cowpea_IT97K-499-35_v1.0	Vu05	37468946	[T/A]	SNP	0.434	0.332	0.626	1.836	PASS	PASS
2_38763	Cowpea_IT97K-499-35_v1.0	Vu05	37898949	[C/T]	SNP	0.347	0.204	0.774	1.976	PASS	PASS
2_28175	Cowpea_IT97K-499-35_v1.0	Vu05	38170833	[G/A]	SNP	0.488	0.428	0.847	2.066	PASS	PASS
2_00602	Cowpea_IT97K-499-35_v1.0	Vu05	38404725	[A/G]	SNP	0.236	0.393	0.111	2.143	PASS	PASS
2_55502	Cowpea_IT97K-499-35_v1.0	Vu05	38617296	[G/A]	SNP	0.221	0.339	0.59	2.214	PASS	PASS
2_31626	Cowpea_IT97K-499-35_v1.0	Vu05	39330917	[A/G]	SNP	0.115	0.239	2.69	2.45		PASS
2_21379	Cowpea_IT97K-499-35_v1.0	Vu05	39652334	[A/C]	SNP	0.274	0.245	0.295	2.556	PASS	PASS
2_18156	Cowpea_IT97K-499-35_v1.0	Vu05	39741525	[G/T]	SNP	0.292	0.258	0.074	2.585	PASS	PASS
2_17766	Cowpea_IT97K-499-35_v1.0	Vu05	39838519	[C/T]	SNP	0.323	0.291	0.368	2.617	PASS	PASS
2_53558	Cowpea_IT97K-499-35_v1.0	Vu05	39946763	[T/C]	SNP	0.34	0.321	0.442	2.652	PASS	PASS
2_31260	Cowpea_IT97K-499-35_v1.0	Vu05	40048813	[T/G]	SNP	0.334	0.342	1.105	2.685	PASS	PASS
2_40020	Cowpea_IT97K-499-35_v1.0	Vu05	40142267	[A/G]	SNP	0.307	0.208	2.063	2.716	PASS	PASS
2_00376	Cowpea_IT97K-499-35_v1.0	Vu05	40247300	[T/C]	SNP	0.3	0.174	0.074	2.75	PASS	PASS
2_04428	Cowpea_IT97K-499-35_v1.0	Vu05	40365734	[A/G]	SNP	0.263	0.168	0.147	2.788	PASS	PASS
2_04237	Cowpea_IT97K-499-35_v1.0	Vu05	40453926	[T/C]	SNP	0.28	0.163	0.479	2.816	PASS	PASS
2_52546	Cowpea_IT97K-499-35_v1.0	Vu05	40557283	[T/C]	SNP	0.491	0.5	6.706	2.849	PASS	PASS
2_31593	Cowpea_IT97K-499-35_v1.0	Vu05	40664223	[G/T]	SNP	0.465	0.416	1.253	2.883	PASS	PASS
2_28154	Cowpea_IT97K-499-35_v1.0	Vu05	40858769	[T/G]	SNP	0.262	0.144	0.368	2.945	PASS	PASS
2_27385	Cowpea_IT97K-499-35_v1.0	Vu05	40971171	[C/T]	SNP	0.496	0.448	0.111	2.981	PASS	PASS
2_09357	Cowpea_IT97K-499-35_v1.0	Vu05	41053087	[C/T]	SNP	0.486	0.438	0.405	3.007	PASS	PASS
2_12333	Cowpea_IT97K-499-35_v1.0	Vu05	41131516	[G/A]	SNP	0.478	0.443	0.147	3.031	PASS	PASS
2_30513	Cowpea_IT97K-499-35_v1.0	Vu05	41250221	[C/T]	SNP	0.251	0.174	0.258	3.068	PASS	PASS
2_03008	Cowpea_IT97K-499-35_v1.0	Vu05	41381736	[A/G]	SNP	0.465	0.427	0.258	3.109	PASS	PASS
2_47745	Cowpea_IT97K-499-35_v1.0	Vu05	41499035	[C/T]	SNP	0.416	0.462	0.111	3.146	PASS	PASS
2_29912	Cowpea_IT97K-499-35_v1.0	Vu05	41649719	[G/A]	SNP	0.403	0.492	0.405	3.192	PASS	PASS
2_07932	Cowpea_IT97K-499-35_v1.0	Vu05	41722853	[G/A]	SNP	0.411	0.332	0.332	3.214	PASS	PASS
2_34687	Cowpea_IT97K-499-35_v1.0	Vu05	41794142	[C/G]	SNP	0.402	0.467	0.516	3.236	PASS	PASS
2_38364	Cowpea_IT97K-499-35_v1.0	Vu05	41922461	[A/C]	SNP	0.496	0.446	0.405	3.275	PASS	PASS
2_41333	Cowpea_IT97K-499-35_v1.0	Vu05	42234184	[T/C]	SNP	0.069	0.078	2.837	3.37		PASS
2_40705	Cowpea_IT97K-499-35_v1.0	Vu05	42503662	[T/G]	SNP	0.353	0.429	0.516	3.451	PASS	PASS
2_28104	Cowpea_IT97K-499-35_v1.0	Vu05	42906632	[C/T]	SNP	0.324	0.38	1.437	3.572	PASS	PASS
2_19577	Cowpea_IT97K-499-35_v1.0	Vu05	42988331	[G/A]	SNP	0.3	0.25	0.074	3.596	PASS	PASS
2_05752	Cowpea_IT97K-499-35_v1.0	Vu05	43051916	[T/G]	SNP	0.345	0.435	0.184	3.615	PASS	PASS
2_16977	Cowpea_IT97K-499-35_v1.0	Vu05	43124275	[A/C]	SNP	0.253	0.198	0.442	3.637	PASS	PASS
2_01909	Cowpea_IT97K-499-35_v1.0	Vu05	43187179	[A/G]	SNP	0.307	0.307	0.111	3.656	PASS	PASS
2_25217	Cowpea_IT97K-499-35_v1.0	Vu05	43249670	[G/A]	SNP	0.397	0.375	0.442	3.675	PASS	PASS
2_24451	Cowpea_IT97K-499-35_v1.0	Vu05	43320077	[A/G]	SNP	0.466	0.467	0.737	3.696	PASS	PASS
2_29518	Cowpea_IT97K-499-35_v1.0	Vu05	43387684	[G/A]	SNP	0.497	0.406	9.506	3.716	PASS	PASS
2_07754	Cowpea_IT97K-499-35_v1.0	Vu05	43611855	[C/T]	SNP	0.316	0.307	0.037	3.784	PASS	PASS
2_47950	Cowpea_IT97K-499-35_v1.0	Vu05	43679720	[T/C]	SNP	0.157	0.253	0.332	3.805	PASS	PASS
2_06671	Cowpea_IT97K-499-35_v1.0	Vu05	43771038	[C/T]	SNP	0.153	0.255	0.405	3.833	PASS	PASS
2_05393	Cowpea_IT97K-499-35_v1.0	Vu05	43846714	[C/T]	SNP	0.268	0.348	0.111	3.856	PASS	PASS
2_33501	Cowpea_IT97K-499-35_v1.0	Vu05	43955799	[G/C]	SNP	0.133	0.272	0.184	3.89	PASS	PASS
2_46569	Cowpea_IT97K-499-35_v1.0	Vu05	44063940	[C/T]	SNP	0.459	0.416	0.59	3.924	PASS	PASS
2_50797	Cowpea_IT97K-499-35_v1.0	Vu05	44122913	[A/G]	SNP	0.446	0.476	0.295	3.942	PASS	PASS
2_47746	Cowpea_IT97K-499-35_v1.0	Vu05	44229993	[A/G]	SNP	0.251	0.239	0	3.976	PASS	PASS
2_12427	Cowpea_IT97K-499-35_v1.0	Vu05	44527171	[C/T]	SNP	0.434	0.495	0.295	4.073	PASS	PASS
2_28893	Cowpea_IT97K-499-35_v1.0	Vu05	44585688	[C/A]	SNP	0.371	0.348	0.184	4.092	PASS	PASS
2_04062	Cowpea_IT97K-499-35_v1.0	Vu05	44642996	[A/G]	SNP	0.392	0.492	0.111	4.112	PASS	PASS
2_49215	Cowpea_IT97K-499-35_v1.0	Vu05	44705298	[T/C]	SNP	0.256	0.185	1.916	4.133	PASS	PASS
2_45003	Cowpea_IT97K-499-35_v1.0	Vu05	44789346	[A/G]	SNP	0.319	0.254	1.548	4.161	PASS	PASS
2_11765	Cowpea_IT97K-499-35_v1.0	Vu05	44923847	[G/A]	SNP	0.447	0.359	0.442	4.208	PASS	PASS
2_39880	Cowpea_IT97K-499-35_v1.0	Vu05	45014901	[G/A]	SNP	0.165	0.338	1.069	4.241	PASS	PASS
2_04258	Cowpea_IT97K-499-35_v1.0	Vu05	45085291	[T/C]	SNP	0.328	0.405	0.111	4.266	PASS	PASS
2_28638	Cowpea_IT97K-499-35_v1.0	Vu05	45176792	[G/A]	SNP	0.189	0.251	0.7	4.299	PASS	PASS
2_12374	Cowpea_IT97K-499-35_v1.0	Vu05	45336008	[T/C]	SNP	0.361	0.378	0.368	4.359	PASS	PASS
2_07664	Cowpea_IT97K-499-35_v1.0	Vu05	45409788	[C/T]	SNP	0.341	0.293	0.332	4.388	PASS	PASS
2_09516	Cowpea_IT97K-499-35_v1.0	Vu05	45466416	[G/A]	SNP	0.188	0.318	0.221	4.41	PASS	PASS
2_09529	Cowpea_IT97K-499-35_v1.0	Vu05	45548872	[A/G]	SNP	0.375	0.465	0.442	4.443	PASS	PASS
2_27466	Cowpea_IT97K-499-35_v1.0	Vu05	45766729	[T/C]	SNP	0.1	0.101	0.332	4.533		PASS
2_12771	Cowpea_IT97K-499-35_v1.0	Vu05	46075321	[A/C]	SNP	0.299	0.304	0.221	4.67	PASS	PASS
2_35557	Cowpea_IT97K-499-35_v1.0	Vu05	46410221	[C/T]	SNP	0.081	0.09	1.805	4.833		PASS
2_16911	Cowpea_IT97K-499-35_v1.0	Vu05	46475066	[A/G]	SNP	0.389	0.492	0.184	4.867	PASS	PASS
2_28252	Cowpea_IT97K-499-35_v1.0	Vu05	46526120	[T/G]	SNP	0.466	0.345	0.7	4.894	PASS	PASS
2_23044	Cowpea_IT97K-499-35_v1.0	Vu05	46578318	[C/T]	SNP	0.217	0.375	0.295	4.922	PASS	PASS
2_02266	Cowpea_IT97K-499-35_v1.0	Vu05	46629390	[T/C]	SNP	0.368	0.497	0.147	4.95	PASS	PASS
2_13478	Cowpea_IT97K-499-35_v1.0	Vu05	46691268	[T/C]	SNP	0.27	0.245	0.111	4.984	PASS	PASS
2_07544	Cowpea_IT97K-499-35_v1.0	Vu05	46769924	[C/T]	SNP	0.49	0.384	6.264	5.029	PASS	PASS
2_33710	Cowpea_IT97K-499-35_v1.0	Vu05	46833805	[C/G]	SNP	0.321	0.345	0.847	5.066	PASS	PASS
2_15792	Cowpea_IT97K-499-35_v1.0	Vu05	46882224	[T/C]	SNP	0.404	0.44	0.184	5.095	PASS	PASS
2_02975	Cowpea_IT97K-499-35_v1.0	Vu05	46988880	[A/G]	SNP	0.221	0.25	0.368	5.16	PASS	PASS
2_00214	Cowpea_IT97K-499-35_v1.0	Vu05	47065081	[T/C]	SNP	0.468	0.364	0.442	5.208	PASS	PASS
2_32236	Cowpea_IT97K-499-35_v1.0	Vu05	47108909	[G/A]	SNP	0.452	0.402	0.147	5.237	PASS	PASS
2_22704	Cowpea_IT97K-499-35_v1.0	Vu05	47154463	[G/A]	SNP	0.22	0.394	0.442	5.266	PASS	PASS
2_18322	Cowpea_IT97K-499-35_v1.0	Vu05	47202204	[G/T]	SNP	0.458	0.372	0.111	5.298	PASS	PASS
2_31127	Cowpea_IT97K-499-35_v1.0	Vu05	47254785	[A/G]	SNP	0.283	0.255	0.368	5.334	PASS	PASS
2_25065	Cowpea_IT97K-499-35_v1.0	Vu05	47298073	[C/T]	SNP	0.308	0.196	0.626	5.364	PASS	PASS
2_04086	Cowpea_IT97K-499-35_v1.0	Vu05	47347789	[T/C]	SNP	0.346	0.356	0.074	5.399	PASS	PASS
2_49575	Cowpea_IT97K-499-35_v1.0	Vu05	47422756	[G/A]	SNP	0.394	0.299	0.737	5.453	PASS	PASS
2_28156	Cowpea_IT97K-499-35_v1.0	Vu05	47587973	[C/T]	SNP	0.435	0.489	0.405	5.577	PASS	PASS
2_49359	Cowpea_IT97K-499-35_v1.0	Vu05	47720919	[G/C]	SNP	0.333	0.319	0.516	5.649	PASS	PASS
2_55071	Cowpea_IT97K-499-35_v1.0	Vu05	47983108	[T/A]	SNP	0.32	0.299	2.137	5.649	PASS	PASS
2_11024	Cowpea_IT97K-499-35_v1.0	Vu05	48175083	[C/T]	SNP	0.319	0.326	0.811	5.649	PASS	PASS
2_31508	Cowpea_IT97K-499-35_v1.0	Vu05	48224294	[G/A]	SNP	0.47	0.489	0.479	5.649	PASS	PASS
2_32929	Cowpea_IT97K-499-35_v1.0	Vu05	48438745	[C/G]	SNP	0.348	0.386	0.111	5.649	PASS	PASS
2_01209	Cowpea_IT97K-499-35_v1.0	Vu05	48482896	[T/C]	SNP	0.408	0.427	0.442	5.649	PASS	PASS
2_08248	Cowpea_IT97K-499-35_v1.0	Vu05	48526462	[T/C]	SNP	0.419	0.394	0.221	5.649	PASS	PASS
2_19364	Cowpea_IT97K-499-35_v1.0	Vu05	48583954	[T/C]	SNP	0.465	0.454	0.479	5.649	PASS	PASS
2_14723	Cowpea_IT97K-499-35_v1.0	Vu05	48626253	[T/C]	SNP	0.463	0.438	0.295	5.649	PASS	PASS
2_53850	Cowpea_IT97K-499-35_v1.0	Vu05	48682333	[C/A]	SNP	0.329	0.34	0.221	5.649	PASS	PASS
2_28210	Cowpea_IT97K-499-35_v1.0	Vu06	124432	[C/T]	SNP	0.493	0.407	1.069	0.01	PASS	PASS
2_39282	Cowpea_IT97K-499-35_v1.0	Vu06	2779687	[A/C]	SNP	0.2	0.326	0.442	0.032	PASS	PASS
2_48254	Cowpea_IT97K-499-35_v1.0	Vu06	3095490	[A/G]	SNP	0.411	0.495	0.405	0.151	PASS	PASS
2_46753	Cowpea_IT97K-499-35_v1.0	Vu06	3861122	[T/C]	SNP	0.4	0.497	0.921	0.331	PASS	PASS
2_54470	Cowpea_IT97K-499-35_v1.0	Vu06	4269832	[T/C]	SNP	0.422	0.448	0.368	0.376	PASS	PASS
2_53969	Cowpea_IT97K-499-35_v1.0	Vu06	4660661	[T/C]	SNP	0.43	0.434	0.442	0.392	PASS	PASS
2_50511	Cowpea_IT97K-499-35_v1.0	Vu06	5183562	[C/T]	SNP	0.461	0.34	0.479	0.382	PASS	PASS
2_49034	Cowpea_IT97K-499-35_v1.0	Vu06	5713359	[A/G]	SNP	0.169	0.282	1.032	0.345	PASS	PASS
2_40891	Cowpea_IT97K-499-35_v1.0	Vu06	6647509	[C/T]	SNP	0.459	0.34	0.516	0.242	PASS	PASS
2_26863	Cowpea_IT97K-499-35_v1.0	Vu06	7750673	[A/G]	SNP	0.407	0.293	1.769	0.11	PASS	PASS
2_41737	Cowpea_IT97K-499-35_v1.0	Vu06	10537116	[C/T]	SNP	0.415	0.29	0.663	0.034	PASS	PASS
2_40099	Cowpea_IT97K-499-35_v1.0	Vu06	11473754	[T/C]	SNP	0.251	0.326	1.879	0.146	PASS	PASS
2_50757	Cowpea_IT97K-499-35_v1.0	Vu06	12023731	[T/G]	SNP	0.25	0.234	0.626	0.247	PASS	PASS
2_44579	Cowpea_IT97K-499-35_v1.0	Vu06	12418225	[A/G]	SNP	0.404	0.494	6.116	0.336	PASS	PASS
2_53155	Cowpea_IT97K-499-35_v1.0	Vu06	13259046	[G/A]	SNP	0.245	0.287	0.626	0.568	PASS	PASS
2_40955	Cowpea_IT97K-499-35_v1.0	Vu06	13518774	[G/A]	SNP	0.498	0.334	0.516	0.65	PASS	PASS
2_47464	Cowpea_IT97K-499-35_v1.0	Vu06	13748321	[C/T]	SNP	0.191	0.318	0.184	0.727	PASS	PASS
2_46322	Cowpea_IT97K-499-35_v1.0	Vu06	13983157	[G/A]	SNP	0.476	0.298	0.811	0.809	PASS	PASS
2_42687	Cowpea_IT97K-499-35_v1.0	Vu06	14712318	[T/C]	SNP	0.425	0.47	0.774	1.085	PASS	PASS
2_25507	Cowpea_IT97K-499-35_v1.0	Vu06	15072530	[C/T]	SNP	0.312	0.495	0.479	1.231	PASS	PASS
2_52396	Cowpea_IT97K-499-35_v1.0	Vu06	15767539	[G/T]	SNP	0.198	0.361	1.548	1.527	PASS	PASS
2_15824	Cowpea_IT97K-499-35_v1.0	Vu06	16100527	[G/T]	SNP	0.324	0.492	0.442	1.675	PASS	PASS
2_23486	Cowpea_IT97K-499-35_v1.0	Vu06	16363092	[A/C]	SNP	0.339	0.497	0.037	1.792	PASS	PASS
2_39014	Cowpea_IT97K-499-35_v1.0	Vu06	16509924	[G/A]	SNP	0.354	0.492	0.479	1.858	PASS	PASS
2_43981	Cowpea_IT97K-499-35_v1.0	Vu06	16647285	[A/G]	SNP	0.364	0.459	0.405	1.92	PASS	PASS
2_50530	Cowpea_IT97K-499-35_v1.0	Vu06	16803372	[G/A]	SNP	0.31	0.44	0.7	1.991	PASS	PASS
2_03029	Cowpea_IT97K-499-35_v1.0	Vu06	16932875	[G/A]	SNP	0.284	0.354	0.368	2.05	PASS	PASS
2_33137	Cowpea_IT97K-499-35_v1.0	Vu06	17076442	[G/C]	SNP	0.463	0.466	1.842	2.115	PASS	PASS
2_18582	Cowpea_IT97K-499-35_v1.0	Vu06	17189841	[C/T]	SNP	0.34	0.285	0.368	2.166	PASS	PASS
2_24332	Cowpea_IT97K-499-35_v1.0	Vu06	17334612	[T/C]	SNP	0.359	0.425	0.59	2.232	PASS	PASS
2_12916	Cowpea_IT97K-499-35_v1.0	Vu06	17440542	[C/T]	SNP	0.323	0.478	0.405	2.279	PASS	PASS
2_02730	Cowpea_IT97K-499-35_v1.0	Vu06	17632064	[C/T]	SNP	0.469	0.372	0.147	2.366	PASS	PASS
2_23105	Cowpea_IT97K-499-35_v1.0	Vu06	17778095	[G/A]	SNP	0.266	0.337	0.184	2.431	PASS	PASS
2_26826	Cowpea_IT97K-499-35_v1.0	Vu06	17876454	[G/A]	SNP	0.496	0.427	0.479	2.474	PASS	PASS
1_0933	Cowpea_IT97K-499-35_v1.0	Vu06	17968579	[T/C]	SNP	0.314	0.304	0.111	2.515	PASS	PASS
2_17443	Cowpea_IT97K-499-35_v1.0	Vu06	18065610	[A/C]	SNP	0.274	0.486	0.184	2.558	PASS	PASS
2_23242	Cowpea_IT97K-499-35_v1.0	Vu06	18172264	[C/T]	SNP	0.498	0.383	0.147	2.604	PASS	PASS
2_12061	Cowpea_IT97K-499-35_v1.0	Vu06	18270592	[T/G]	SNP	0.476	0.378	0.221	2.647	PASS	PASS
2_15869	Cowpea_IT97K-499-35_v1.0	Vu06	18380090	[T/C]	SNP	0.494	0.421	0.368	2.694	PASS	PASS
2_39843	Cowpea_IT97K-499-35_v1.0	Vu06	18474908	[A/G]	SNP	0.397	0.333	1.4	2.735	PASS	PASS
2_07536	Cowpea_IT97K-499-35_v1.0	Vu06	18629821	[T/C]	SNP	0.238	0.283	0.516	2.8	PASS	PASS
2_00310	Cowpea_IT97K-499-35_v1.0	Vu06	18749679	[C/T]	SNP	0.333	0.389	0.442	2.85	PASS	PASS
2_06562	Cowpea_IT97K-499-35_v1.0	Vu06	18839745	[G/A]	SNP	0.243	0.28	0.295	2.888	PASS	PASS
2_18696	Cowpea_IT97K-499-35_v1.0	Vu06	18944870	[G/A]	SNP	0.316	0.295	0.663	2.931	PASS	PASS
2_53772	Cowpea_IT97K-499-35_v1.0	Vu06	19025192	[C/A]	SNP	0.207	0.356	0.405	2.963	PASS	PASS
2_11742	Cowpea_IT97K-499-35_v1.0	Vu06	19116520	[T/G]	SNP	0.242	0.375	0.221	3	PASS	PASS
2_19080	Cowpea_IT97K-499-35_v1.0	Vu06	19198140	[C/T]	SNP	0.278	0.315	1.29	3.032	PASS	PASS
2_19029	Cowpea_IT97K-499-35_v1.0	Vu06	19272753	[C/A]	SNP	0.455	0.461	0.59	3.061	PASS	PASS
2_15517	Cowpea_IT97K-499-35_v1.0	Vu06	19365814	[T/C]	SNP	0.364	0.432	0.553	3.097	PASS	PASS
2_28560	Cowpea_IT97K-499-35_v1.0	Vu06	19439831	[C/T]	SNP	0.323	0.402	0.553	3.126	PASS	PASS
2_48857	Cowpea_IT97K-499-35_v1.0	Vu06	19544185	[T/C]	SNP	0.288	0.383	0.479	3.165	PASS	PASS
2_52738	Cowpea_IT97K-499-35_v1.0	Vu06	19633442	[A/G]	SNP	0.451	0.484	0.995	3.198	PASS	PASS
2_28930	Cowpea_IT97K-499-35_v1.0	Vu06	19715280	[T/C]	SNP	0.471	0.427	0.516	3.228	PASS	PASS
2_17516	Cowpea_IT97K-499-35_v1.0	Vu06	19792983	[C/T]	SNP	0.464	0.353	0.811	3.257	PASS	PASS
2_02069	Cowpea_IT97K-499-35_v1.0	Vu06	19891385	[A/C]	SNP	0.25	0.253	0.405	3.292	PASS	PASS
2_07263	Cowpea_IT97K-499-35_v1.0	Vu06	19961063	[C/T]	SNP	0.291	0.272	0.074	3.316	PASS	PASS
2_09437	Cowpea_IT97K-499-35_v1.0	Vu06	20060424	[A/G]	SNP	0.423	0.38	0.184	3.351	PASS	PASS
2_24985	Cowpea_IT97K-499-35_v1.0	Vu06	20151959	[A/G]	SNP	0.321	0.365	4.016	3.382	PASS	PASS
2_25881	Cowpea_IT97K-499-35_v1.0	Vu06	20227688	[G/T]	SNP	0.324	0.381	0.995	3.407	PASS	PASS
2_17339	Cowpea_IT97K-499-35_v1.0	Vu06	20298979	[C/T]	SNP	0.255	0.22	0.332	3.43	PASS	PASS
2_50292	Cowpea_IT97K-499-35_v1.0	Vu06	20372416	[G/A]	SNP	0.234	0.396	0.516	3.454	PASS	PASS
2_29559	Cowpea_IT97K-499-35_v1.0	Vu06	20438009	[C/T]	SNP	0.283	0.28	0.221	3.475	PASS	PASS
2_32468	Cowpea_IT97K-499-35_v1.0	Vu06	20504979	[G/C]	SNP	0.416	0.465	0.332	3.496	PASS	PASS
2_23696	Cowpea_IT97K-499-35_v1.0	Vu06	20613693	[C/T]	SNP	0.406	0.5	0.295	3.529	PASS	PASS
2_08543	Cowpea_IT97K-499-35_v1.0	Vu06	20687527	[A/C]	SNP	0.489	0.486	0.184	3.551	PASS	PASS
2_01763	Cowpea_IT97K-499-35_v1.0	Vu06	20776150	[T/C]	SNP	0.239	0.304	0.184	3.577	PASS	PASS
2_34080	Cowpea_IT97K-499-35_v1.0	Vu06	20924678	[C/G]	SNP	0.49	0.434	3.537	3.619	PASS	PASS
2_28296	Cowpea_IT97K-499-35_v1.0	Vu06	20993155	[A/G]	SNP	0.372	0.358	3.5	3.638	PASS	PASS
2_18129	Cowpea_IT97K-499-35_v1.0	Vu06	21062039	[G/A]	SNP	0.288	0.31	0.295	3.656	PASS	PASS
2_16999	Cowpea_IT97K-499-35_v1.0	Vu06	21136032	[G/T]	SNP	0.275	0.402	0.442	3.676	PASS	PASS
2_53843	Cowpea_IT97K-499-35_v1.0	Vu06	21204597	[T/C]	SNP	0.411	0.326	0.516	3.693	PASS	PASS
2_22139	Cowpea_IT97K-499-35_v1.0	Vu06	21279386	[G/A]	SNP	0.377	0.427	0.074	3.712	PASS	PASS
2_29378	Cowpea_IT97K-499-35_v1.0	Vu06	21671410	[T/C]	SNP	0.421	0.465	0.295	3.802	PASS	PASS
2_53430	Cowpea_IT97K-499-35_v1.0	Vu06	21751350	[G/A]	SNP	0.27	0.235	0.442	3.819	PASS	PASS
2_16731	Cowpea_IT97K-499-35_v1.0	Vu06	21811772	[G/A]	SNP	0.29	0.476	0.074	3.831	PASS	PASS
2_06045	Cowpea_IT97K-499-35_v1.0	Vu06	21881607	[G/A]	SNP	0.413	0.486	0.553	3.844	PASS	PASS
2_01614	Cowpea_IT97K-499-35_v1.0	Vu06	22042272	[C/T]	SNP	0.489	0.457	0.332	3.874	PASS	PASS
2_28473	Cowpea_IT97K-499-35_v1.0	Vu06	22107415	[T/C]	SNP	0.458	0.492	0.737	3.885	PASS	PASS
2_10763	Cowpea_IT97K-499-35_v1.0	Vu06	22375970	[A/C]	SNP	0.341	0.236	0.221	3.928	PASS	PASS
1_1042	Cowpea_IT97K-499-35_v1.0	Vu06	22481486	[T/C]	SNP	0.245	0.378	0.184	3.942	PASS	PASS
2_01259	Cowpea_IT97K-499-35_v1.0	Vu06	22563655	[T/G]	SNP	0.458	0.435	0.147	3.953	PASS	PASS
2_24202	Cowpea_IT97K-499-35_v1.0	Vu06	22624577	[A/C]	SNP	0.369	0.391	0.184	3.961	PASS	PASS
2_13071	Cowpea_IT97K-499-35_v1.0	Vu06	22687443	[C/T]	SNP	0.411	0.438	0.037	3.968	PASS	PASS
2_07208	Cowpea_IT97K-499-35_v1.0	Vu06	22758417	[T/C]	SNP	0.382	0.407	1.179	3.976	PASS	PASS
2_30963	Cowpea_IT97K-499-35_v1.0	Vu06	22875829	[C/T]	SNP	0.469	0.486	0.516	3.988	PASS	PASS
2_44355	Cowpea_IT97K-499-35_v1.0	Vu06	22941168	[T/C]	SNP	0.411	0.44	0.737	3.994	PASS	PASS
2_30936	Cowpea_IT97K-499-35_v1.0	Vu06	22998149	[T/C]	SNP	0.415	0.451	0.626	3.999	PASS	PASS
2_14804	Cowpea_IT97K-499-35_v1.0	Vu06	23066194	[C/A]	SNP	0.466	0.484	0.295	4.004	PASS	PASS
2_26304	Cowpea_IT97K-499-35_v1.0	Vu06	23150670	[C/T]	SNP	0.357	0.324	0.884	4.01	PASS	PASS
2_10363	Cowpea_IT97K-499-35_v1.0	Vu06	23211868	[G/T]	SNP	0.433	0.367	4.2	4.014	PASS	PASS
2_01395	Cowpea_IT97K-499-35_v1.0	Vu06	23270270	[G/A]	SNP	0.421	0.44	0.184	4.018	PASS	PASS
2_04074	Cowpea_IT97K-499-35_v1.0	Vu06	23327030	[C/T]	SNP	0.374	0.397	0.553	4.021	PASS	PASS
2_04262	Cowpea_IT97K-499-35_v1.0	Vu06	23397648	[G/A]	SNP	0.296	0.383	2.137	4.024	PASS	PASS
2_24981	Cowpea_IT97K-499-35_v1.0	Vu06	23475512	[G/A]	SNP	0.283	0.25	0.368	4.027	PASS	PASS
2_06806	Cowpea_IT97K-499-35_v1.0	Vu06	23548478	[A/C]	SNP	0.282	0.261	0.553	4.029	PASS	PASS
2_12664	Cowpea_IT97K-499-35_v1.0	Vu06	23645189	[C/T]	SNP	0.366	0.478	0.258	4.032	PASS	PASS
2_02468	Cowpea_IT97K-499-35_v1.0	Vu06	23716424	[C/A]	SNP	0.359	0.489	0.7	4.033	PASS	PASS
2_17996	Cowpea_IT97K-499-35_v1.0	Vu06	23773455	[C/A]	SNP	0.362	0.342	0.442	4.033	PASS	PASS
2_04508	Cowpea_IT97K-499-35_v1.0	Vu06	24103608	[C/A]	SNP	0.495	0.443	0.258	4.03	PASS	PASS
2_31069	Cowpea_IT97K-499-35_v1.0	Vu06	24166408	[A/G]	SNP	0.226	0.275	4.532	4.028	PASS	PASS
2_33242	Cowpea_IT97K-499-35_v1.0	Vu06	24224549	[A/T]	SNP	0.391	0.489	1.437	4.026	PASS	PASS
2_22092	Cowpea_IT97K-499-35_v1.0	Vu06	24363643	[G/A]	SNP	0.343	0.334	0.553	4.02	PASS	PASS
2_38885	Cowpea_IT97K-499-35_v1.0	Vu06	24436792	[T/C]	SNP	0.347	0.313	0.442	4.016	PASS	PASS
2_38409	Cowpea_IT97K-499-35_v1.0	Vu06	24498011	[A/C]	SNP	0.457	0.336	6.264	4.012	PASS	PASS
2_38838	Cowpea_IT97K-499-35_v1.0	Vu06	24584655	[G/A]	SNP	0.273	0.21	0.332	4.006	PASS	PASS
2_00530	Cowpea_IT97K-499-35_v1.0	Vu06	24652188	[C/T]	SNP	0.206	0.348	0.479	4.001	PASS	PASS
2_29833	Cowpea_IT97K-499-35_v1.0	Vu06	24715284	[G/A]	SNP	0.121	0.277	0.405	3.996	PASS	PASS
2_22267	Cowpea_IT97K-499-35_v1.0	Vu06	24772370	[A/G]	SNP	0.26	0.168	0.184	3.991	PASS	PASS
2_17534	Cowpea_IT97K-499-35_v1.0	Vu06	24838488	[A/G]	SNP	0.209	0.383	0.184	3.985	PASS	PASS
2_18119	Cowpea_IT97K-499-35_v1.0	Vu06	24895855	[C/T]	SNP	0.457	0.443	0.184	3.98	PASS	PASS
2_21320	Cowpea_IT97K-499-35_v1.0	Vu06	24960900	[G/T]	SNP	0.251	0.152	0.295	3.973	PASS	PASS
2_03838	Cowpea_IT97K-499-35_v1.0	Vu06	25022999	[T/C]	SNP	0.401	0.451	0.147	3.967	PASS	PASS
2_43607	Cowpea_IT97K-499-35_v1.0	Vu06	25151143	[T/C]	SNP	0.408	0.462	0.847	3.952	PASS	PASS
2_17079	Cowpea_IT97K-499-35_v1.0	Vu06	25212589	[G/A]	SNP	0.297	0.277	0.295	3.944	PASS	PASS
2_03087	Cowpea_IT97K-499-35_v1.0	Vu06	25273806	[A/G]	SNP	0.296	0.359	0.184	3.936	PASS	PASS
2_07944	Cowpea_IT97K-499-35_v1.0	Vu06	25349825	[A/G]	SNP	0.334	0.418	0.074	3.926	PASS	PASS
2_34313	Cowpea_IT97K-499-35_v1.0	Vu06	25414027	[C/G]	SNP	0.316	0.413	0.663	3.917	PASS	PASS
2_34413	Cowpea_IT97K-499-35_v1.0	Vu06	25510641	[T/A]	SNP	0.219	0.332	0.442	3.903	PASS	PASS
2_07646	Cowpea_IT97K-499-35_v1.0	Vu06	25570940	[C/T]	SNP	0.195	0.31	0.442	3.894	PASS	PASS
2_08065	Cowpea_IT97K-499-35_v1.0	Vu06	25634464	[C/T]	SNP	0.327	0.425	1.179	3.884	PASS	PASS
2_33907	Cowpea_IT97K-499-35_v1.0	Vu06	25696554	[C/G]	SNP	0.263	0.364	0.479	3.874	PASS	PASS
2_25667	Cowpea_IT97K-499-35_v1.0	Vu06	25778903	[T/G]	SNP	0.456	0.348	0.184	3.86	PASS	PASS
2_03333	Cowpea_IT97K-499-35_v1.0	Vu06	25838992	[G/A]	SNP	0.276	0.37	0.184	3.85	PASS	PASS
2_47637	Cowpea_IT97K-499-35_v1.0	Vu06	26064317	[A/G]	SNP	0.256	0.223	0	3.809	PASS	PASS
2_29873	Cowpea_IT97K-499-35_v1.0	Vu06	26178438	[A/G]	SNP	0.251	0.269	0.184	3.787	PASS	PASS
2_02580	Cowpea_IT97K-499-35_v1.0	Vu06	26270532	[T/C]	SNP	0.232	0.35	1.326	3.769	PASS	PASS
2_18342	Cowpea_IT97K-499-35_v1.0	Vu06	26352090	[C/A]	SNP	0.333	0.432	0.368	3.753	PASS	PASS
2_22455	Cowpea_IT97K-499-35_v1.0	Vu06	26418270	[A/C]	SNP	0.37	0.47	0.074	3.739	PASS	PASS
2_13489	Cowpea_IT97K-499-35_v1.0	Vu06	26479628	[A/G]	SNP	0.347	0.443	0.368	3.726	PASS	PASS
2_21797	Cowpea_IT97K-499-35_v1.0	Vu06	26542890	[C/T]	SNP	0.224	0.38	0.258	3.713	PASS	PASS
2_33317	Cowpea_IT97K-499-35_v1.0	Vu06	26604635	[C/G]	SNP	0.254	0.356	0.221	3.699	PASS	PASS
2_00655	Cowpea_IT97K-499-35_v1.0	Vu06	26667756	[A/G]	SNP	0.248	0.334	0.184	3.686	PASS	PASS
2_22376	Cowpea_IT97K-499-35_v1.0	Vu06	26808111	[A/G]	SNP	0.201	0.329	0.111	3.654	PASS	PASS
2_02891	Cowpea_IT97K-499-35_v1.0	Vu06	26881974	[G/A]	SNP	0.191	0.34	0.111	3.638	PASS	PASS
2_53692	Cowpea_IT97K-499-35_v1.0	Vu06	26950471	[A/G]	SNP	0.469	0.402	0.258	3.622	PASS	PASS
2_33360	Cowpea_IT97K-499-35_v1.0	Vu06	27016053	[A/T]	SNP	0.327	0.25	0.295	3.607	PASS	PASS
2_14440	Cowpea_IT97K-499-35_v1.0	Vu06	27089433	[A/G]	SNP	0.446	0.476	0.405	3.59	PASS	PASS
2_22640	Cowpea_IT97K-499-35_v1.0	Vu06	27161633	[C/T]	SNP	0.422	0.489	0.111	3.573	PASS	PASS
2_14650	Cowpea_IT97K-499-35_v1.0	Vu06	27233021	[G/T]	SNP	0.394	0.473	0.147	3.556	PASS	PASS
2_06541	Cowpea_IT97K-499-35_v1.0	Vu06	27310022	[G/T]	SNP	0.447	0.492	0.553	3.537	PASS	PASS
2_22655	Cowpea_IT97K-499-35_v1.0	Vu06	27437282	[A/C]	SNP	0.379	0.291	0.295	3.507	PASS	PASS
2_51785	Cowpea_IT97K-499-35_v1.0	Vu06	27556685	[T/C]	SNP	0.274	0.152	0.442	3.478	PASS	PASS
2_30400	Cowpea_IT97K-499-35_v1.0	Vu06	27684416	[G/A]	SNP	0.272	0.158	0.405	3.447	PASS	PASS
2_26533	Cowpea_IT97K-499-35_v1.0	Vu06	27752525	[T/C]	SNP	0.394	0.276	0.7	3.43	PASS	PASS
2_31399	Cowpea_IT97K-499-35_v1.0	Vu06	27826705	[C/A]	SNP	0.269	0.255	0.295	3.412	PASS	PASS
2_24363	Cowpea_IT97K-499-35_v1.0	Vu06	27894108	[C/T]	SNP	0.427	0.348	0.405	3.396	PASS	PASS
2_16747	Cowpea_IT97K-499-35_v1.0	Vu06	27967931	[G/A]	SNP	0.491	0.402	0.184	3.378	PASS	PASS
2_03368	Cowpea_IT97K-499-35_v1.0	Vu06	28044503	[G/A]	SNP	0.499	0.484	0.258	3.36	PASS	PASS
2_17790	Cowpea_IT97K-499-35_v1.0	Vu06	28264396	[G/T]	SNP	0.496	0.418	0.811	3.308	PASS	PASS
2_30468	Cowpea_IT97K-499-35_v1.0	Vu06	28341994	[C/T]	SNP	0.432	0.405	2.653	3.29	PASS	PASS
2_10488	Cowpea_IT97K-499-35_v1.0	Vu06	28650811	[C/T]	SNP	0.316	0.25	0.147	3.22	PASS	PASS
2_08368	Cowpea_IT97K-499-35_v1.0	Vu06	28883415	[G/A]	SNP	0.276	0.435	0.111	3.171	PASS	PASS
2_52882	Cowpea_IT97K-499-35_v1.0	Vu06	29019187	[T/C]	SNP	0.254	0.326	0.516	3.144	PASS	PASS
2_42897	Cowpea_IT97K-499-35_v1.0	Vu06	29190805	[C/A]	SNP	0.429	0.475	1.842	3.112	PASS	PASS
2_18874	Cowpea_IT97K-499-35_v1.0	Vu06	29281045	[C/T]	SNP	0.293	0.394	0.332	3.097	PASS	PASS
2_11031	Cowpea_IT97K-499-35_v1.0	Vu06	29358991	[T/C]	SNP	0.227	0.253	0.147	3.084	PASS	PASS
2_13012	Cowpea_IT97K-499-35_v1.0	Vu06	29513341	[G/A]	SNP	0.223	0.299	0.074	3.06	PASS	PASS
2_08908	Cowpea_IT97K-499-35_v1.0	Vu06	29694736	[T/G]	SNP	0.455	0.448	0.295	3.035	PASS	PASS
2_18829	Cowpea_IT97K-499-35_v1.0	Vu06	29772103	[C/T]	SNP	0.334	0.457	0.295	3.026	PASS	PASS
2_07111	Cowpea_IT97K-499-35_v1.0	Vu06	29854411	[C/T]	SNP	0.36	0.286	1.658	3.017	PASS	PASS
2_09451	Cowpea_IT97K-499-35_v1.0	Vu06	29944290	[G/A]	SNP	0.46	0.416	0.479	3.008	PASS	PASS
2_03141	Cowpea_IT97K-499-35_v1.0	Vu06	30024324	[G/A]	SNP	0.377	0.318	0.405	3.002	PASS	PASS
2_47961	Cowpea_IT97K-499-35_v1.0	Vu06	30219552	[G/T]	SNP	0.257	0.253	0.147	2.99	PASS	PASS
2_49178	Cowpea_IT97K-499-35_v1.0	Vu06	30307169	[C/A]	SNP	0.436	0.314	7.332	2.986	PASS	PASS
2_54049	Cowpea_IT97K-499-35_v1.0	Vu06	30387949	[G/A]	SNP	0.391	0.476	0.221	2.985	PASS	PASS
2_43176	Cowpea_IT97K-499-35_v1.0	Vu06	30477690	[T/C]	SNP	0.429	0.429	0.405	2.984	PASS	PASS
2_22427	Cowpea_IT97K-499-35_v1.0	Vu06	30559420	[G/T]	SNP	0.256	0.207	0.405	2.985	PASS	PASS
2_28509	Cowpea_IT97K-499-35_v1.0	Vu06	30649701	[T/C]	SNP	0.351	0.389	0.442	2.987	PASS	PASS
2_06731	Cowpea_IT97K-499-35_v1.0	Vu06	30726037	[T/C]	SNP	0.363	0.451	0.811	2.991	PASS	PASS
2_16889	Cowpea_IT97K-499-35_v1.0	Vu06	30806313	[C/A]	SNP	0.373	0.459	0.332	2.996	PASS	PASS
2_09834	Cowpea_IT97K-499-35_v1.0	Vu06	30886319	[G/A]	SNP	0.364	0.402	0.111	3.002	PASS	PASS
2_24150	Cowpea_IT97K-499-35_v1.0	Vu06	30970339	[T/C]	SNP	0.384	0.457	0.184	3.01	PASS	PASS
2_14693	Cowpea_IT97K-499-35_v1.0	Vu06	31048874	[T/C]	SNP	0.328	0.272	0.074	3.02	PASS	PASS
2_33040	Cowpea_IT97K-499-35_v1.0	Vu06	31144686	[T/A]	SNP	0.35	0.364	0.184	3.033	PASS	PASS
2_13322	Cowpea_IT97K-499-35_v1.0	Vu06	31231514	[A/G]	SNP	0.241	0.323	0.111	3.048	PASS	PASS
2_08717	Cowpea_IT97K-499-35_v1.0	Vu06	31316541	[G/A]	SNP	0.305	0.37	0.59	3.064	PASS	PASS
2_18836	Cowpea_IT97K-499-35_v1.0	Vu06	31399398	[C/T]	SNP	0.466	0.383	0.368	3.081	PASS	PASS
2_18676	Cowpea_IT97K-499-35_v1.0	Vu06	31473695	[C/T]	SNP	0.259	0.152	0.368	3.099	PASS	PASS
2_02652	Cowpea_IT97K-499-35_v1.0	Vu06	31548683	[A/G]	SNP	0.265	0.203	0.332	3.118	PASS	PASS
2_16384	Cowpea_IT97K-499-35_v1.0	Vu06	31621755	[T/C]	SNP	0.301	0.273	0.368	3.138	PASS	PASS
2_30209	Cowpea_IT97K-499-35_v1.0	Vu06	31695009	[T/C]	SNP	0.311	0.272	0.295	3.161	PASS	PASS
2_31301	Cowpea_IT97K-499-35_v1.0	Vu06	31772764	[G/A]	SNP	0.322	0.277	0.221	3.186	PASS	PASS
2_47387	Cowpea_IT97K-499-35_v1.0	Vu06	31845850	[T/C]	SNP	0.372	0.375	0.368	3.212	PASS	PASS
2_15885	Cowpea_IT97K-499-35_v1.0	Vu06	31997814	[T/C]	SNP	0.462	0.445	0.479	3.271	PASS	PASS
2_33474	Cowpea_IT97K-499-35_v1.0	Vu06	32070477	[G/C]	SNP	0.445	0.353	0.295	3.302	PASS	PASS
2_18126	Cowpea_IT97K-499-35_v1.0	Vu06	32147409	[C/T]	SNP	0.357	0.31	0.368	3.337	PASS	PASS
2_32622	Cowpea_IT97K-499-35_v1.0	Vu06	32239676	[T/A]	SNP	0.39	0.253	0.405	3.382	PASS	PASS
2_01318	Cowpea_IT97K-499-35_v1.0	Vu06	32310360	[G/A]	SNP	0.421	0.473	0.368	3.419	PASS	PASS
2_18261	Cowpea_IT97K-499-35_v1.0	Vu06	32378136	[G/A]	SNP	0.354	0.321	0.037	3.456	PASS	PASS
2_02179	Cowpea_IT97K-499-35_v1.0	Vu06	32448250	[T/G]	SNP	0.415	0.484	0.037	3.497	PASS	PASS
2_07514	Cowpea_IT97K-499-35_v1.0	Vu06	32528096	[C/T]	SNP	0.4	0.367	0.332	3.545	PASS	PASS
2_01526	Cowpea_IT97K-499-35_v1.0	Vu06	32597297	[T/C]	SNP	0.218	0.334	0.258	3.589	PASS	PASS
2_07115	Cowpea_IT97K-499-35_v1.0	Vu06	32663699	[A/G]	SNP	0.442	0.383	0.074	3.634	PASS	PASS
2_54827	Cowpea_IT97K-499-35_v1.0	Vu06	32763112	[G/T]	SNP	0.449	0.375	0.258	3.704	PASS	PASS
2_07510	Cowpea_IT97K-499-35_v1.0	Vu06	32880092	[A/C]	SNP	0.261	0.198	0.111	3.792	PASS	PASS
2_31249	Cowpea_IT97K-499-35_v1.0	Vu06	32940465	[A/C]	SNP	0.282	0.274	0.368	3.84	PASS	PASS
2_05732	Cowpea_IT97K-499-35_v1.0	Vu06	33017941	[C/T]	SNP	0.266	0.204	0.479	3.904	PASS	PASS
2_15027	Cowpea_IT97K-499-35_v1.0	Vu06	33077887	[G/A]	SNP	0.262	0.19	0.037	3.956	PASS	PASS
2_03064	Cowpea_IT97K-499-35_v1.0	Vu06	33151129	[G/A]	SNP	0.328	0.313	0.111	3.968	PASS	PASS
2_21398	Cowpea_IT97K-499-35_v1.0	Vu06	33219337	[G/A]	SNP	0.244	0.288	0.221	3.968	PASS	PASS
2_27636	Cowpea_IT97K-499-35_v1.0	Vu06	33304343	[G/A]	SNP	0.362	0.353	0.405	3.968	PASS	PASS
2_29695	Cowpea_IT97K-499-35_v1.0	Vu06	33445042	[G/A]	SNP	0.252	0.142	2.284	3.968	PASS	PASS
2_22718	Cowpea_IT97K-499-35_v1.0	Vu06	33641797	[T/C]	SNP	0.242	0.486	0.7	3.968	PASS	PASS
2_13201	Cowpea_IT97K-499-35_v1.0	Vu06	33700000	[T/C]	SNP	0.19	0.408	0.368	3.968	PASS	PASS
2_04647	Cowpea_IT97K-499-35_v1.0	Vu06	33767068	[A/G]	SNP	0.326	0.47	0.405	3.968	PASS	PASS
2_00324	Cowpea_IT97K-499-35_v1.0	Vu06	33863326	[G/T]	SNP	0.427	0.443	0.111	3.968	PASS	PASS
2_47293	Cowpea_IT97K-499-35_v1.0	Vu06	33929162	[G/A]	SNP	0.323	0.364	9.543	3.968	PASS	PASS
1_0307	Cowpea_IT97K-499-35_v1.0	Vu06	33992357	[G/A]	SNP	0.245	0.348	0.111	3.968	PASS	PASS
2_18825	Cowpea_IT97K-499-35_v1.0	Vu06	34051305	[A/C]	SNP	0.458	0.432	0.111	3.968	PASS	PASS
2_02666	Cowpea_IT97K-499-35_v1.0	Vu06	34116453	[G/A]	SNP	0.45	0.44	0.368	3.968	PASS	PASS
2_24615	Cowpea_IT97K-499-35_v1.0	Vu06	34201558	[C/T]	SNP	0.375	0.478	0.258	3.968	PASS	PASS
2_02949	Cowpea_IT97K-499-35_v1.0	Vu06	34261190	[C/T]	SNP	0.487	0.361	0.184	3.968	PASS	PASS
2_01177	Cowpea_IT97K-499-35_v1.0	Vu06	34321772	[T/C]	SNP	0.466	0.334	0.221	3.968	PASS	PASS
2_38134	Cowpea_IT97K-499-35_v1.0	Vu06	34384870	[C/T]	SNP	0.468	0.336	0.516	3.968	PASS	PASS
2_14316	Cowpea_IT97K-499-35_v1.0	Vu07	51380	[G/A]	SNP	0.297	0.424	0.258	6.367	PASS	PASS
2_11731	Cowpea_IT97K-499-35_v1.0	Vu07	94810	[A/G]	SNP	0.27	0.378	0.405	6.367	PASS	PASS
2_46359	Cowpea_IT97K-499-35_v1.0	Vu07	148414	[C/A]	SNP	0.42	0.486	1.732	6.367	PASS	PASS
2_21266	Cowpea_IT97K-499-35_v1.0	Vu07	197094	[A/C]	SNP	0.438	0.323	0.221	6.367	PASS	PASS
2_33104	Cowpea_IT97K-499-35_v1.0	Vu07	240298	[A/T]	SNP	0.342	0.457	5.601	6.367	PASS	PASS
2_05746	Cowpea_IT97K-499-35_v1.0	Vu07	280821	[C/T]	SNP	0.391	0.486	0.258	6.367	PASS	PASS
2_18599	Cowpea_IT97K-499-35_v1.0	Vu07	346872	[C/T]	SNP	0.306	0.288	0.147	6.367	PASS	PASS
2_08735	Cowpea_IT97K-499-35_v1.0	Vu07	538253	[C/T]	SNP	0.394	0.429	0.111	6.367	PASS	PASS
2_53159	Cowpea_IT97K-499-35_v1.0	Vu07	600603	[G/T]	SNP	0.259	0.274	0.295	6.367	PASS	PASS
2_34054	Cowpea_IT97K-499-35_v1.0	Vu07	674123	[T/A]	SNP	0.254	0.302	0.626	6.259	PASS	PASS
2_10074	Cowpea_IT97K-499-35_v1.0	Vu07	725356	[C/T]	SNP	0.308	0.423	0.553	6.185	PASS	PASS
2_15203	Cowpea_IT97K-499-35_v1.0	Vu07	776965	[G/T]	SNP	0.433	0.467	0.221	6.112	PASS	PASS
2_33218	Cowpea_IT97K-499-35_v1.0	Vu07	841978	[T/A]	SNP	0.468	0.429	0.111	6.022	PASS	PASS
2_09021	Cowpea_IT97K-499-35_v1.0	Vu07	907628	[G/A]	SNP	0.176	0.272	0.221	5.933	PASS	PASS
2_51377	Cowpea_IT97K-499-35_v1.0	Vu07	1041934	[A/G]	SNP	0.336	0.38	0.442	5.757	PASS	PASS
2_37823	Cowpea_IT97K-499-35_v1.0	Vu07	1095273	[A/G]	SNP	0.353	0.389	0.921	5.689	PASS	PASS
2_23142	Cowpea_IT97K-499-35_v1.0	Vu07	1137011	[G/A]	SNP	0.485	0.486	0.295	5.637	PASS	PASS
2_50412	Cowpea_IT97K-499-35_v1.0	Vu07	1250968	[T/C]	SNP	0.359	0.32	0.221	5.499	PASS	PASS
2_20368	Cowpea_IT97K-499-35_v1.0	Vu07	1300543	[A/G]	SNP	0.348	0.258	0.074	5.441	PASS	PASS
2_45844	Cowpea_IT97K-499-35_v1.0	Vu07	1353135	[C/T]	SNP	0.383	0.324	0.884	5.38	PASS	PASS
2_26398	Cowpea_IT97K-499-35_v1.0	Vu07	1397085	[G/A]	SNP	0.38	0.323	1.658	5.331	PASS	PASS
2_28314	Cowpea_IT97K-499-35_v1.0	Vu07	1471003	[G/A]	SNP	0.4	0.356	0.442	5.249	PASS	PASS
2_27532	Cowpea_IT97K-499-35_v1.0	Vu07	1530321	[G/A]	SNP	0.4	0.303	1.105	5.185	PASS	PASS
2_09965	Cowpea_IT97K-499-35_v1.0	Vu07	1586695	[C/T]	SNP	0.294	0.341	1.069	5.125	PASS	PASS
2_07955	Cowpea_IT97K-499-35_v1.0	Vu07	1642862	[G/T]	SNP	0.312	0.327	4.606	5.067	PASS	PASS
2_10857	Cowpea_IT97K-499-35_v1.0	Vu07	1695061	[G/T]	SNP	0.293	0.16	0.111	5.014	PASS	PASS
2_03405	Cowpea_IT97K-499-35_v1.0	Vu07	1745981	[T/G]	SNP	0.239	0.302	0.737	4.964	PASS	PASS
2_22360	Cowpea_IT97K-499-35_v1.0	Vu07	1814970	[T/C]	SNP	0.361	0.486	0.221	4.897	PASS	PASS
2_07628	Cowpea_IT97K-499-35_v1.0	Vu07	1880393	[A/G]	SNP	0.21	0.372	0.368	4.835	PASS	PASS
2_39570	Cowpea_IT97K-499-35_v1.0	Vu07	1948414	[G/A]	SNP	0.461	0.318	0.774	4.772	PASS	PASS
2_45804	Cowpea_IT97K-499-35_v1.0	Vu07	2027074	[C/T]	SNP	0.491	0.313	0.442	4.702	PASS	PASS
2_04655	Cowpea_IT97K-499-35_v1.0	Vu07	2085371	[C/T]	SNP	0.324	0.301	0.405	4.652	PASS	PASS
2_10354	Cowpea_IT97K-499-35_v1.0	Vu07	2135240	[G/A]	SNP	0.367	0.484	0.368	4.609	PASS	PASS
2_46914	Cowpea_IT97K-499-35_v1.0	Vu07	2187328	[T/A]	SNP	0.348	0.31	0.516	4.566	PASS	PASS
2_55219	Cowpea_IT97K-499-35_v1.0	Vu07	2243613	[T/C]	SNP	0.394	0.369	0.7	4.52	PASS	PASS
2_20618	Cowpea_IT97K-499-35_v1.0	Vu07	2300224	[G/T]	SNP	0.467	0.361	4.974	4.475	PASS	PASS
2_14740	Cowpea_IT97K-499-35_v1.0	Vu07	2364535	[T/C]	SNP	0.351	0.301	3.353	4.425	PASS	PASS
2_14279	Cowpea_IT97K-499-35_v1.0	Vu07	2651668	[G/A]	SNP	0.379	0.228	0.074	4.218	PASS	PASS
2_23059	Cowpea_IT97K-499-35_v1.0	Vu07	2713762	[A/G]	SNP	0.388	0.424	0.111	4.177	PASS	PASS
2_28654	Cowpea_IT97K-499-35_v1.0	Vu07	2774454	[T/G]	SNP	0.378	0.41	0.442	4.137	PASS	PASS
2_20573	Cowpea_IT97K-499-35_v1.0	Vu07	2928472	[T/C]	SNP	0.259	0.32	1.363	4.041	PASS	PASS
2_24617	Cowpea_IT97K-499-35_v1.0	Vu07	3005646	[G/A]	SNP	0.342	0.443	0.7	3.995	PASS	PASS
2_23290	Cowpea_IT97K-499-35_v1.0	Vu07	3075029	[A/G]	SNP	0.295	0.288	0.184	3.955	PASS	PASS
2_01591	Cowpea_IT97K-499-35_v1.0	Vu07	3146867	[C/T]	SNP	0.445	0.375	0.221	3.915	PASS	PASS
2_28378	Cowpea_IT97K-499-35_v1.0	Vu07	3225763	[A/G]	SNP	0.254	0.255	0.442	3.872	PASS	PASS
2_50646	Cowpea_IT97K-499-35_v1.0	Vu07	3320808	[A/G]	SNP	0.168	0.297	3.132	3.823	PASS	PASS
2_22872	Cowpea_IT97K-499-35_v1.0	Vu07	3499342	[A/C]	SNP	0.27	0.239	0.147	3.734	PASS	PASS
2_29594	Cowpea_IT97K-499-35_v1.0	Vu07	3562641	[A/C]	SNP	0.272	0.22	0.516	3.704	PASS	PASS
2_18762	Cowpea_IT97K-499-35_v1.0	Vu07	3651721	[A/G]	SNP	0.489	0.41	0.258	3.664	PASS	PASS
2_06872	Cowpea_IT97K-499-35_v1.0	Vu07	3715837	[A/C]	SNP	0.391	0.342	0.442	3.635	PASS	PASS
2_11975	Cowpea_IT97K-499-35_v1.0	Vu07	3811593	[A/G]	SNP	0.43	0.486	0.037	3.594	PASS	PASS
2_42178	Cowpea_IT97K-499-35_v1.0	Vu07	3915385	[C/T]	SNP	0.339	0.371	3.537	3.551	PASS	PASS
2_51032	Cowpea_IT97K-499-35_v1.0	Vu07	4003468	[A/G]	SNP	0.251	0.13	1.732	3.516	PASS	PASS
2_20154	Cowpea_IT97K-499-35_v1.0	Vu07	4087525	[T/C]	SNP	0.274	0.272	0.368	3.483	PASS	PASS
2_25905	Cowpea_IT97K-499-35_v1.0	Vu07	4305317	[T/C]	SNP	0.427	0.47	0.442	3.403	PASS	PASS
2_04289	Cowpea_IT97K-499-35_v1.0	Vu07	4383475	[G/T]	SNP	0.444	0.481	0.442	3.375	PASS	PASS
2_11097	Cowpea_IT97K-499-35_v1.0	Vu07	4498477	[A/G]	SNP	0.381	0.318	0.332	3.336	PASS	PASS
2_34580	Cowpea_IT97K-499-35_v1.0	Vu07	4579925	[T/A]	SNP	0.39	0.348	0.663	3.309	PASS	PASS
2_07477	Cowpea_IT97K-499-35_v1.0	Vu07	4656962	[G/T]	SNP	0.403	0.31	0.442	3.284	PASS	PASS
2_28772	Cowpea_IT97K-499-35_v1.0	Vu07	4730280	[C/A]	SNP	0.391	0.307	0.405	3.261	PASS	PASS
2_44781	Cowpea_IT97K-499-35_v1.0	Vu07	4823415	[A/G]	SNP	0.428	0.325	1.769	3.232	PASS	PASS
2_22904	Cowpea_IT97K-499-35_v1.0	Vu07	4896287	[T/C]	SNP	0.432	0.329	0.258	3.21	PASS	PASS
2_18715	Cowpea_IT97K-499-35_v1.0	Vu07	4988338	[T/G]	SNP	0.331	0.386	1.548	3.182	PASS	PASS
2_46340	Cowpea_IT97K-499-35_v1.0	Vu07	5140876	[T/A]	SNP	0.256	0.277	0.184	3.137	PASS	PASS
2_52311	Cowpea_IT97K-499-35_v1.0	Vu07	5222426	[A/G]	SNP	0.453	0.421	0.368	3.114	PASS	PASS
2_02753	Cowpea_IT97K-499-35_v1.0	Vu07	5307750	[T/C]	SNP	0.22	0.351	0.221	3.09	PASS	PASS
2_54735	Cowpea_IT97K-499-35_v1.0	Vu07	5430467	[T/C]	SNP	0.385	0.399	0.368	3.055	PASS	PASS
2_48791	Cowpea_IT97K-499-35_v1.0	Vu07	5619227	[A/G]	SNP	0.307	0.218	0.7	3.003	PASS	PASS
2_12171	Cowpea_IT97K-499-35_v1.0	Vu07	5738401	[G/A]	SNP	0.427	0.242	0.184	2.971	PASS	PASS
2_43629	Cowpea_IT97K-499-35_v1.0	Vu07	5854947	[T/C]	SNP	0.244	0.266	0.405	2.94	PASS	PASS
2_23777	Cowpea_IT97K-499-35_v1.0	Vu07	5947074	[C/A]	SNP	0.277	0.277	0.111	2.915	PASS	PASS
2_39484	Cowpea_IT97K-499-35_v1.0	Vu07	6027313	[G/A]	SNP	0.426	0.469	3.648	2.893	PASS	PASS
2_08121	Cowpea_IT97K-499-35_v1.0	Vu07	6108327	[A/G]	SNP	0.287	0.28	0.111	2.871	PASS	PASS
2_07480	Cowpea_IT97K-499-35_v1.0	Vu07	6192813	[C/T]	SNP	0.311	0.318	0.184	2.849	PASS	PASS
2_17387	Cowpea_IT97K-499-35_v1.0	Vu07	6282367	[C/T]	SNP	0.297	0.287	0.516	2.824	PASS	PASS
2_32783	Cowpea_IT97K-499-35_v1.0	Vu07	6379866	[T/A]	SNP	0.302	0.291	0.368	2.798	PASS	PASS
2_38477	Cowpea_IT97K-499-35_v1.0	Vu07	6488998	[T/G]	SNP	0.202	0.442	0.626	2.768	PASS	PASS
2_41770	Cowpea_IT97K-499-35_v1.0	Vu07	6797197	[G/A]	SNP	0.134	0.254	1.142	2.683	PASS	PASS
2_28580	Cowpea_IT97K-499-35_v1.0	Vu07	7105402	[A/G]	SNP	0.476	0.367	0.405	2.596	PASS	PASS
2_07577	Cowpea_IT97K-499-35_v1.0	Vu07	7553026	[C/A]	SNP	0.132	0.25	0.147	2.463	PASS	PASS
2_01016	Cowpea_IT97K-499-35_v1.0	Vu07	7648950	[T/G]	SNP	0.267	0.269	0.626	2.434	PASS	PASS
2_46460	Cowpea_IT97K-499-35_v1.0	Vu07	7799199	[T/C]	SNP	0.251	0.141	0.442	2.388	PASS	PASS
2_12236	Cowpea_IT97K-499-35_v1.0	Vu07	7918284	[T/C]	SNP	0.269	0.198	0.074	2.35	PASS	PASS
2_42114	Cowpea_IT97K-499-35_v1.0	Vu07	8084843	[A/G]	SNP	0.186	0.33	0.59	2.297	PASS	PASS
2_46384	Cowpea_IT97K-499-35_v1.0	Vu07	8203341	[C/T]	SNP	0.493	0.492	0.442	2.258	PASS	PASS
2_51030	Cowpea_IT97K-499-35_v1.0	Vu07	8480109	[A/G]	SNP	0.235	0.266	0.332	2.167	PASS	PASS
2_52818	Cowpea_IT97K-499-35_v1.0	Vu07	8767540	[T/C]	SNP	0.182	0.296	0.442	2.069	PASS	PASS
2_38780	Cowpea_IT97K-499-35_v1.0	Vu07	8880570	[A/G]	SNP	0.234	0.402	0.442	2.029	PASS	PASS
2_20527	Cowpea_IT97K-499-35_v1.0	Vu07	9004826	[A/G]	SNP	0.234	0.429	0.59	1.986	PASS	PASS
2_45539	Cowpea_IT97K-499-35_v1.0	Vu07	9156663	[G/T]	SNP	0.283	0.288	0.516	1.932	PASS	PASS
2_45236	Cowpea_IT97K-499-35_v1.0	Vu07	9304477	[A/G]	SNP	0.239	0.345	0.442	1.879	PASS	PASS
2_51374	Cowpea_IT97K-499-35_v1.0	Vu07	9567218	[T/G]	SNP	0.175	0.257	0.884	1.784	PASS	PASS
2_54415	Cowpea_IT97K-499-35_v1.0	Vu07	9743114	[T/C]	SNP	0.175	0.255	0.405	1.72	PASS	PASS
2_34518	Cowpea_IT97K-499-35_v1.0	Vu07	10163792	[C/G]	SNP	0.281	0.39	5.38	1.566	PASS	PASS
2_08391	Cowpea_IT97K-499-35_v1.0	Vu07	10340125	[G/A]	SNP	0.295	0.5	0.516	1.501	PASS	PASS
2_21934	Cowpea_IT97K-499-35_v1.0	Vu07	10537121	[A/G]	SNP	0.22	0.405	0.037	1.429	PASS	PASS
2_51505	Cowpea_IT97K-499-35_v1.0	Vu07	10713158	[G/A]	SNP	0.218	0.424	0.405	1.365	PASS	PASS
1_0061	Cowpea_IT97K-499-35_v1.0	Vu07	11083480	[A/T]	SNP	0.314	0.258	0.332	1.233	PASS	PASS
2_20988	Cowpea_IT97K-499-35_v1.0	Vu07	11878938	[A/G]	SNP	0.19	0.378	0.405	0.963	PASS	PASS
2_44144	Cowpea_IT97K-499-35_v1.0	Vu07	12283352	[T/C]	SNP	0.273	0.287	0.516	0.838	PASS	PASS
2_51871	Cowpea_IT97K-499-35_v1.0	Vu07	12485205	[T/C]	SNP	0.422	0.264	0.368	0.779	PASS	PASS
2_16165	Cowpea_IT97K-499-35_v1.0	Vu07	12713875	[A/C]	SNP	0.453	0.473	0.111	0.716	PASS	PASS
2_53967	Cowpea_IT97K-499-35_v1.0	Vu07	12967864	[G/A]	SNP	0.383	0.326	0.442	0.651	PASS	PASS
2_40639	Cowpea_IT97K-499-35_v1.0	Vu07	13237671	[A/G]	SNP	0.439	0.464	0.516	0.586	PASS	PASS
2_44688	Cowpea_IT97K-499-35_v1.0	Vu07	13705438	[A/G]	SNP	0.427	0.356	0.442	0.49	PASS	PASS
2_40009	Cowpea_IT97K-499-35_v1.0	Vu07	14097900	[G/C]	SNP	0.329	0.481	0.663	0.426	PASS	PASS
2_54697	Cowpea_IT97K-499-35_v1.0	Vu07	14919978	[C/T]	SNP	0.375	0.299	0.516	0.34	PASS	PASS
2_54172	Cowpea_IT97K-499-35_v1.0	Vu07	15774834	[T/C]	SNP	0.338	0.489	0.516	0.327	PASS	PASS
2_54797	Cowpea_IT97K-499-35_v1.0	Vu07	17095574	[T/C]	SNP	0.374	0.306	1.069	0.455	PASS	PASS
2_50810	Cowpea_IT97K-499-35_v1.0	Vu07	17399315	[A/C]	SNP	0.438	0.423	0.847	0.508	PASS	PASS
2_00073	Cowpea_IT97K-499-35_v1.0	Vu07	17674189	[T/C]	SNP	0.48	0.418	0.184	0.563	PASS	PASS
2_47143	Cowpea_IT97K-499-35_v1.0	Vu07	17922038	[C/A]	SNP	0.334	0.475	7.553	0.617	PASS	PASS
2_45910	Cowpea_IT97K-499-35_v1.0	Vu07	18306644	[G/A]	SNP	0.223	0.375	0.368	0.711	PASS	PASS
2_48012	Cowpea_IT97K-499-35_v1.0	Vu07	18785167	[G/T]	SNP	0.374	0.462	0.59	0.84	PASS	PASS
2_29015	Cowpea_IT97K-499-35_v1.0	Vu07	19035267	[A/C]	SNP	0.4	0.432	0.258	0.913	PASS	PASS
2_23565	Cowpea_IT97K-499-35_v1.0	Vu07	19267544	[T/C]	SNP	0.397	0.261	0.368	0.983	PASS	PASS
2_51319	Cowpea_IT97K-499-35_v1.0	Vu07	19490375	[T/G]	SNP	0.422	0.278	0.626	1.053	PASS	PASS
2_06783	Cowpea_IT97K-499-35_v1.0	Vu07	19694195	[C/T]	SNP	0.262	0.189	0.663	1.118	PASS	PASS
2_32831	Cowpea_IT97K-499-35_v1.0	Vu07	19905277	[C/G]	SNP	0.229	0.399	0.368	1.186	PASS	PASS
2_22869	Cowpea_IT97K-499-35_v1.0	Vu07	20111663	[C/T]	SNP	0.366	0.242	0.258	1.254	PASS	PASS
2_55172	Cowpea_IT97K-499-35_v1.0	Vu07	20295282	[C/T]	SNP	0.437	0.331	0.479	1.315	PASS	PASS
2_17108	Cowpea_IT97K-499-35_v1.0	Vu07	20465839	[A/G]	SNP	0.346	0.293	0.295	1.372	PASS	PASS
2_47670	Cowpea_IT97K-499-35_v1.0	Vu07	20629436	[T/G]	SNP	0.342	0.264	0.774	1.427	PASS	PASS
2_01670	Cowpea_IT97K-499-35_v1.0	Vu07	20808628	[T/C]	SNP	0.282	0.234	0.368	1.487	PASS	PASS
2_29860	Cowpea_IT97K-499-35_v1.0	Vu07	21018006	[T/C]	SNP	0.255	0.201	0.295	1.558	PASS	PASS
2_18459	Cowpea_IT97K-499-35_v1.0	Vu07	21174521	[C/T]	SNP	0.296	0.239	0.258	1.61	PASS	PASS
2_20060	Cowpea_IT97K-499-35_v1.0	Vu07	21498532	[C/T]	SNP	0.224	0.304	0.184	1.717	PASS	PASS
2_49183	Cowpea_IT97K-499-35_v1.0	Vu07	21788461	[A/G]	SNP	0.334	0.448	0.737	1.812	PASS	PASS
2_43619	Cowpea_IT97K-499-35_v1.0	Vu07	22202114	[T/C]	SNP	0.297	0.277	0.368	1.942	PASS	PASS
2_01077	Cowpea_IT97K-499-35_v1.0	Vu07	22323953	[A/C]	SNP	0.364	0.397	0.332	1.98	PASS	PASS
2_51889	Cowpea_IT97K-499-35_v1.0	Vu07	22465914	[T/C]	SNP	0.44	0.462	1.216	2.023	PASS	PASS
2_17773	Cowpea_IT97K-499-35_v1.0	Vu07	22578512	[G/A]	SNP	0.451	0.454	0.405	2.056	PASS	PASS
2_19077	Cowpea_IT97K-499-35_v1.0	Vu07	22712648	[A/G]	SNP	0.29	0.272	0.221	2.096	PASS	PASS
2_18562	Cowpea_IT97K-499-35_v1.0	Vu07	22840870	[T/G]	SNP	0.417	0.476	0.184	2.132	PASS	PASS
2_29600	Cowpea_IT97K-499-35_v1.0	Vu07	22946963	[T/C]	SNP	0.348	0.431	9.948	2.162	PASS	PASS
2_11839	Cowpea_IT97K-499-35_v1.0	Vu07	23107831	[C/T]	SNP	0.285	0.231	0.59	2.207	PASS	PASS
2_03283	Cowpea_IT97K-499-35_v1.0	Vu07	23239607	[A/G]	SNP	0.275	0.215	0.258	2.242	PASS	PASS
2_12758	Cowpea_IT97K-499-35_v1.0	Vu07	23341686	[T/G]	SNP	0.347	0.296	0.442	2.269	PASS	PASS
2_54231	Cowpea_IT97K-499-35_v1.0	Vu07	23442631	[T/C]	SNP	0.333	0.253	0.59	2.295	PASS	PASS
2_31778	Cowpea_IT97K-499-35_v1.0	Vu07	23564096	[C/T]	SNP	0.215	0.37	0.516	2.326	PASS	PASS
2_34565	Cowpea_IT97K-499-35_v1.0	Vu07	23705735	[C/G]	SNP	0.435	0.397	0.111	2.36	PASS	PASS
2_13361	Cowpea_IT97K-499-35_v1.0	Vu07	23834370	[G/A]	SNP	0.27	0.451	0.442	2.391	PASS	PASS
2_09340	Cowpea_IT97K-499-35_v1.0	Vu07	23946293	[C/T]	SNP	0.264	0.429	1.142	2.417	PASS	PASS
2_47424	Cowpea_IT97K-499-35_v1.0	Vu07	24060891	[A/C]	SNP	0.288	0.484	0.59	2.442	PASS	PASS
2_07563	Cowpea_IT97K-499-35_v1.0	Vu07	24200388	[T/C]	SNP	0.446	0.418	0.258	2.473	PASS	PASS
2_08214	Cowpea_IT97K-499-35_v1.0	Vu07	24299896	[C/T]	SNP	0.447	0.401	0.479	2.494	PASS	PASS
2_12490	Cowpea_IT97K-499-35_v1.0	Vu07	24420693	[T/C]	SNP	0.405	0.432	0.258	2.518	PASS	PASS
2_12882	Cowpea_IT97K-499-35_v1.0	Vu07	24521329	[G/A]	SNP	0.334	0.288	0.479	2.538	PASS	PASS
2_03953	Cowpea_IT97K-499-35_v1.0	Vu07	24658559	[C/T]	SNP	0.344	0.299	0.258	2.565	PASS	PASS
2_14236	Cowpea_IT97K-499-35_v1.0	Vu07	24780070	[C/T]	SNP	0.313	0.19	0.332	2.587	PASS	PASS
2_47943	Cowpea_IT97K-499-35_v1.0	Vu07	24873914	[T/A]	SNP	0.273	0.234	0.221	2.604	PASS	PASS
2_52045	Cowpea_IT97K-499-35_v1.0	Vu07	24962112	[A/G]	SNP	0.391	0.182	0.184	2.619	PASS	PASS
2_18315	Cowpea_IT97K-499-35_v1.0	Vu07	25051854	[G/A]	SNP	0.299	0.465	0.516	2.634	PASS	PASS
2_14370	Cowpea_IT97K-499-35_v1.0	Vu07	25158752	[A/G]	SNP	0.338	0.304	0.184	2.651	PASS	PASS
2_13172	Cowpea_IT97K-499-35_v1.0	Vu07	25261206	[G/A]	SNP	0.306	0.266	0.037	2.667	PASS	PASS
2_46237	Cowpea_IT97K-499-35_v1.0	Vu07	25351847	[C/T]	SNP	0.403	0.424	1.032	2.681	PASS	PASS
2_04843	Cowpea_IT97K-499-35_v1.0	Vu07	25438449	[C/T]	SNP	0.349	0.299	0.037	2.694	PASS	PASS
2_05837	Cowpea_IT97K-499-35_v1.0	Vu07	25528290	[A/G]	SNP	0.332	0.288	0.184	2.706	PASS	PASS
2_02103	Cowpea_IT97K-499-35_v1.0	Vu07	25612314	[C/T]	SNP	0.487	0.375	0.405	2.718	PASS	PASS
2_32766	Cowpea_IT97K-499-35_v1.0	Vu07	25709967	[G/C]	SNP	0.458	0.359	0.111	2.731	PASS	PASS
2_19423	Cowpea_IT97K-499-35_v1.0	Vu07	25863610	[T/C]	SNP	0.3	0.5	0.405	2.75	PASS	PASS
2_05821	Cowpea_IT97K-499-35_v1.0	Vu07	25949394	[T/C]	SNP	0.495	0.325	1.069	2.761	PASS	PASS
2_09527	Cowpea_IT97K-499-35_v1.0	Vu07	26085154	[A/G]	SNP	0.343	0.484	0	2.776	PASS	PASS
2_38016	Cowpea_IT97K-499-35_v1.0	Vu07	26386879	[A/G]	SNP	0.403	0.279	0.921	2.808	PASS	PASS
2_22221	Cowpea_IT97K-499-35_v1.0	Vu07	26512652	[A/C]	SNP	0.442	0.38	0.184	2.82	PASS	PASS
2_30733	Cowpea_IT97K-499-35_v1.0	Vu07	26612593	[C/T]	SNP	0.235	0.367	0.553	2.829	PASS	PASS
2_32930	Cowpea_IT97K-499-35_v1.0	Vu07	26771960	[C/G]	SNP	0.26	0.223	0.332	2.842	PASS	PASS
2_41478	Cowpea_IT97K-499-35_v1.0	Vu07	26969084	[C/T]	SNP	0.337	0.434	0.737	2.858	PASS	PASS
2_31014	Cowpea_IT97K-499-35_v1.0	Vu07	27048917	[C/T]	SNP	0.336	0.372	0.258	2.864	PASS	PASS
2_55141	Cowpea_IT97K-499-35_v1.0	Vu07	27138216	[T/C]	SNP	0.313	0.266	0.147	2.87	PASS	PASS
2_53091	Cowpea_IT97K-499-35_v1.0	Vu07	27340886	[C/A]	SNP	0.368	0.355	0.258	2.884	PASS	PASS
2_21953	Cowpea_IT97K-499-35_v1.0	Vu07	27462181	[C/T]	SNP	0.375	0.332	0.295	2.891	PASS	PASS
2_19032	Cowpea_IT97K-499-35_v1.0	Vu07	27573925	[C/T]	SNP	0.498	0.484	0.368	2.898	PASS	PASS
2_06452	Cowpea_IT97K-499-35_v1.0	Vu07	27668456	[A/G]	SNP	0.372	0.497	0.221	2.903	PASS	PASS
2_23596	Cowpea_IT97K-499-35_v1.0	Vu07	27752457	[A/C]	SNP	0.41	0.307	0.147	2.908	PASS	PASS
2_27763	Cowpea_IT97K-499-35_v1.0	Vu07	28126892	[A/G]	SNP	0.389	0.465	0.332	2.927	PASS	PASS
2_19204	Cowpea_IT97K-499-35_v1.0	Vu07	28205106	[A/G]	SNP	0.287	0.236	0.074	2.931	PASS	PASS
2_14851	Cowpea_IT97K-499-35_v1.0	Vu07	28284429	[C/T]	SNP	0.398	0.459	0.332	2.935	PASS	PASS
2_09465	Cowpea_IT97K-499-35_v1.0	Vu07	28375747	[T/C]	SNP	0.311	0.182	0.111	2.939	PASS	PASS
2_42453	Cowpea_IT97K-499-35_v1.0	Vu07	28483321	[G/T]	SNP	0.391	0.339	0.516	2.944	PASS	PASS
2_45152	Cowpea_IT97K-499-35_v1.0	Vu07	28585722	[C/A]	SNP	0.398	0.332	0.368	2.949	PASS	PASS
2_09713	Cowpea_IT97K-499-35_v1.0	Vu07	28663802	[C/T]	SNP	0.428	0.418	0.332	2.952	PASS	PASS
2_07896	Cowpea_IT97K-499-35_v1.0	Vu07	28761799	[T/C]	SNP	0.261	0.25	0.074	2.956	PASS	PASS
2_46678	Cowpea_IT97K-499-35_v1.0	Vu07	28862368	[A/G]	SNP	0.252	0.25	0.405	2.961	PASS	PASS
2_02875	Cowpea_IT97K-499-35_v1.0	Vu07	29005316	[C/A]	SNP	0.36	0.31	0.258	2.967	PASS	PASS
2_48719	Cowpea_IT97K-499-35_v1.0	Vu07	29098570	[G/T]	SNP	0.367	0.334	0.405	2.972	PASS	PASS
2_31693	Cowpea_IT97K-499-35_v1.0	Vu07	29192429	[T/C]	SNP	0.345	0.18	0.074	2.976	PASS	PASS
2_23429	Cowpea_IT97K-499-35_v1.0	Vu07	29268977	[T/G]	SNP	0.411	0.462	0.074	2.98	PASS	PASS
2_11437	Cowpea_IT97K-499-35_v1.0	Vu07	29456671	[C/T]	SNP	0.471	0.391	0.368	2.989	PASS	PASS
2_51587	Cowpea_IT97K-499-35_v1.0	Vu07	29544096	[T/C]	SNP	0.423	0.304	0.553	2.993	PASS	PASS
2_15648	Cowpea_IT97K-499-35_v1.0	Vu07	29693585	[G/A]	SNP	0.286	0.302	0.221	3.001	PASS	PASS
2_09100	Cowpea_IT97K-499-35_v1.0	Vu07	29770295	[A/G]	SNP	0.226	0.296	0.295	3.005	PASS	PASS
2_17027	Cowpea_IT97K-499-35_v1.0	Vu07	29917442	[C/T]	SNP	0.428	0.424	0.184	3.013	PASS	PASS
2_11432	Cowpea_IT97K-499-35_v1.0	Vu07	30056327	[T/C]	SNP	0.265	0.285	0.332	3.021	PASS	PASS
2_17029	Cowpea_IT97K-499-35_v1.0	Vu07	30161715	[T/C]	SNP	0.422	0.418	0.074	3.027	PASS	PASS
2_32050	Cowpea_IT97K-499-35_v1.0	Vu07	30244875	[T/C]	SNP	0.265	0.301	0.516	3.032	PASS	PASS
2_12687	Cowpea_IT97K-499-35_v1.0	Vu07	30340954	[C/T]	SNP	0.294	0.313	1.953	3.039	PASS	PASS
2_04810	Cowpea_IT97K-499-35_v1.0	Vu07	30418736	[T/G]	SNP	0.37	0.359	0.295	3.044	PASS	PASS
2_01368	Cowpea_IT97K-499-35_v1.0	Vu07	30495779	[A/C]	SNP	0.325	0.386	0.221	3.049	PASS	PASS
2_44107	Cowpea_IT97K-499-35_v1.0	Vu07	30599849	[A/G]	SNP	0.262	0.213	1.142	3.056	PASS	PASS
2_12398	Cowpea_IT97K-499-35_v1.0	Vu07	30699051	[A/G]	SNP	0.42	0.495	0.147	3.063	PASS	PASS
2_10379	Cowpea_IT97K-499-35_v1.0	Vu07	30776019	[A/C]	SNP	0.391	0.383	0.516	3.069	PASS	PASS
2_19296	Cowpea_IT97K-499-35_v1.0	Vu07	30852861	[G/T]	SNP	0.363	0.319	0.995	3.075	PASS	PASS
2_06923	Cowpea_IT97K-499-35_v1.0	Vu07	30926992	[C/T]	SNP	0.422	0.44	0.442	3.081	PASS	PASS
2_14547	Cowpea_IT97K-499-35_v1.0	Vu07	31004579	[T/C]	SNP	0.479	0.341	0.368	3.087	PASS	PASS
2_20273	Cowpea_IT97K-499-35_v1.0	Vu07	31199482	[C/A]	SNP	0.39	0.405	0.442	3.104	PASS	PASS
2_22766	Cowpea_IT97K-499-35_v1.0	Vu07	31274333	[T/C]	SNP	0.262	0.288	0.184	3.11	PASS	PASS
2_10166	Cowpea_IT97K-499-35_v1.0	Vu07	31355335	[T/C]	SNP	0.286	0.298	0.442	3.118	PASS	PASS
2_13370	Cowpea_IT97K-499-35_v1.0	Vu07	31533824	[A/G]	SNP	0.344	0.266	0.258	3.134	PASS	PASS
2_09114	Cowpea_IT97K-499-35_v1.0	Vu07	31609698	[G/A]	SNP	0.168	0.283	0.368	3.142	PASS	PASS
2_15028	Cowpea_IT97K-499-35_v1.0	Vu07	31717029	[A/G]	SNP	0.178	0.313	0.184	3.152	PASS	PASS
2_17736	Cowpea_IT97K-499-35_v1.0	Vu07	31789963	[G/A]	SNP	0.288	0.231	0.479	3.16	PASS	PASS
2_06623	Cowpea_IT97K-499-35_v1.0	Vu07	31890084	[T/G]	SNP	0.369	0.337	0.147	3.17	PASS	PASS
2_34392	Cowpea_IT97K-499-35_v1.0	Vu07	31987746	[C/G]	SNP	0.331	0.283	0.516	3.181	PASS	PASS
2_11141	Cowpea_IT97K-499-35_v1.0	Vu07	32061962	[T/G]	SNP	0.432	0.457	0.221	3.189	PASS	PASS
2_11329	Cowpea_IT97K-499-35_v1.0	Vu07	32149438	[A/G]	SNP	0.376	0.353	0.147	3.198	PASS	PASS
2_42433	Cowpea_IT97K-499-35_v1.0	Vu07	32240941	[T/C]	SNP	0.257	0.432	0.074	3.208	PASS	PASS
2_50052	Cowpea_IT97K-499-35_v1.0	Vu07	32318494	[G/A]	SNP	0.274	0.201	1.326	3.217	PASS	PASS
2_50326	Cowpea_IT97K-499-35_v1.0	Vu07	32465115	[T/C]	SNP	0.302	0.44	0.553	3.234	PASS	PASS
2_12095	Cowpea_IT97K-499-35_v1.0	Vu07	32541721	[T/C]	SNP	0.443	0.341	0.626	3.243	PASS	PASS
2_12376	Cowpea_IT97K-499-35_v1.0	Vu07	32621835	[T/C]	SNP	0.308	0.443	0.332	3.252	PASS	PASS
2_04862	Cowpea_IT97K-499-35_v1.0	Vu07	32696318	[A/G]	SNP	0.323	0.239	0.221	3.261	PASS	PASS
2_04496	Cowpea_IT97K-499-35_v1.0	Vu07	32769324	[A/C]	SNP	0.432	0.359	0.258	3.27	PASS	PASS
2_20070	Cowpea_IT97K-499-35_v1.0	Vu07	32848564	[C/A]	SNP	0.306	0.246	9.064	3.28	PASS	PASS
2_18108	Cowpea_IT97K-499-35_v1.0	Vu07	33015036	[C/A]	SNP	0.437	0.429	0.479	3.3	PASS	PASS
2_31433	Cowpea_IT97K-499-35_v1.0	Vu07	33086441	[A/G]	SNP	0.373	0.344	0.295	3.309	PASS	PASS
2_04776	Cowpea_IT97K-499-35_v1.0	Vu07	33157321	[G/A]	SNP	0.249	0.432	0.221	3.317	PASS	PASS
2_12246	Cowpea_IT97K-499-35_v1.0	Vu07	33226067	[A/G]	SNP	0.321	0.41	0.516	3.326	PASS	PASS
2_25543	Cowpea_IT97K-499-35_v1.0	Vu07	33301133	[T/C]	SNP	0.376	0.351	0.516	3.335	PASS	PASS
2_10076	Cowpea_IT97K-499-35_v1.0	Vu07	33376155	[G/A]	SNP	0.275	0.274	0.147	3.344	PASS	PASS
2_54081	Cowpea_IT97K-499-35_v1.0	Vu07	33486582	[G/A]	SNP	0.256	0.29	0.442	3.357	PASS	PASS
2_13823	Cowpea_IT97K-499-35_v1.0	Vu07	33560427	[G/A]	SNP	0.408	0.486	0.295	3.366	PASS	PASS
2_15679	Cowpea_IT97K-499-35_v1.0	Vu07	33629111	[A/C]	SNP	0.374	0.495	0.368	3.375	PASS	PASS
2_18337	Cowpea_IT97K-499-35_v1.0	Vu07	33789473	[T/G]	SNP	0.305	0.234	0.184	3.393	PASS	PASS
2_39840	Cowpea_IT97K-499-35_v1.0	Vu07	33866993	[T/G]	SNP	0.446	0.484	0.147	3.403	PASS	PASS
2_12537	Cowpea_IT97K-499-35_v1.0	Vu07	33937563	[C/A]	SNP	0.47	0.421	0.221	3.411	PASS	PASS
2_42219	Cowpea_IT97K-499-35_v1.0	Vu07	34014325	[T/C]	SNP	0.345	0.304	0.332	3.419	PASS	PASS
2_37526	Cowpea_IT97K-499-35_v1.0	Vu07	34082390	[G/C]	SNP	0.273	0.215	0.295	3.427	PASS	PASS
2_51856	Cowpea_IT97K-499-35_v1.0	Vu07	34154695	[A/C]	SNP	0.467	0.374	0.442	3.435	PASS	PASS
2_22561	Cowpea_IT97K-499-35_v1.0	Vu07	34236060	[A/G]	SNP	0.468	0.457	0.405	3.443	PASS	PASS
2_17886	Cowpea_IT97K-499-35_v1.0	Vu07	34355855	[A/G]	SNP	0.253	0.354	1.105	3.456	PASS	PASS
2_33716	Cowpea_IT97K-499-35_v1.0	Vu07	34446194	[A/T]	SNP	0.37	0.418	0.368	3.465	PASS	PASS
2_04116	Cowpea_IT97K-499-35_v1.0	Vu07	34515851	[G/A]	SNP	0.339	0.25	0.332	3.472	PASS	PASS
2_14169	Cowpea_IT97K-499-35_v1.0	Vu07	34755832	[A/G]	SNP	0.287	0.339	0.368	3.493	PASS	PASS
2_17851	Cowpea_IT97K-499-35_v1.0	Vu07	34838942	[T/C]	SNP	0.483	0.462	0.184	3.5	PASS	PASS
2_15955	Cowpea_IT97K-499-35_v1.0	Vu07	34906104	[A/G]	SNP	0.408	0.315	0.7	3.505	PASS	PASS
2_33231	Cowpea_IT97K-499-35_v1.0	Vu07	35000493	[T/A]	SNP	0.425	0.311	0.184	3.512	PASS	PASS
2_11071	Cowpea_IT97K-499-35_v1.0	Vu07	35071814	[A/G]	SNP	0.427	0.467	0.516	3.517	PASS	PASS
2_23731	Cowpea_IT97K-499-35_v1.0	Vu07	35157316	[C/T]	SNP	0.344	0.342	0.037	3.522	PASS	PASS
2_25820	Cowpea_IT97K-499-35_v1.0	Vu07	35273902	[A/C]	SNP	0.373	0.364	0.405	3.528	PASS	PASS
2_06408	Cowpea_IT97K-499-35_v1.0	Vu07	35340278	[T/C]	SNP	0.4	0.478	0.516	3.532	PASS	PASS
2_18015	Cowpea_IT97K-499-35_v1.0	Vu07	35577307	[G/A]	SNP	0.252	0.324	0.147	3.541	PASS	PASS
2_15713	Cowpea_IT97K-499-35_v1.0	Vu07	35647433	[A/C]	SNP	0.35	0.407	0.221	3.542	PASS	PASS
2_27837	Cowpea_IT97K-499-35_v1.0	Vu07	35716013	[A/C]	SNP	0.477	0.435	0.405	3.544	PASS	PASS
2_11633	Cowpea_IT97K-499-35_v1.0	Vu07	35780790	[T/C]	SNP	0.464	0.416	0.295	3.545	PASS	PASS
2_02124	Cowpea_IT97K-499-35_v1.0	Vu07	35848252	[A/G]	SNP	0.44	0.432	0.368	3.545	PASS	PASS
2_47418	Cowpea_IT97K-499-35_v1.0	Vu07	35991236	[C/A]	SNP	0.265	0.298	0.368	3.545	PASS	PASS
2_07653	Cowpea_IT97K-499-35_v1.0	Vu07	36165959	[A/G]	SNP	0.44	0.37	0.368	3.543	PASS	PASS
2_02735	Cowpea_IT97K-499-35_v1.0	Vu07	36245747	[C/T]	SNP	0.408	0.34	0.258	3.541	PASS	PASS
2_15328	Cowpea_IT97K-499-35_v1.0	Vu07	36312704	[C/A]	SNP	0.286	0.356	0.332	3.538	PASS	PASS
2_08738	Cowpea_IT97K-499-35_v1.0	Vu07	36380122	[C/A]	SNP	0.255	0.269	0.111	3.535	PASS	PASS
2_24221	Cowpea_IT97K-499-35_v1.0	Vu07	36476409	[A/C]	SNP	0.401	0.454	0.405	3.531	PASS	PASS
1_0551	Cowpea_IT97K-499-35_v1.0	Vu07	36551009	[G/A]	SNP	0.316	0.353	0.258	3.527	PASS	PASS
2_17877	Cowpea_IT97K-499-35_v1.0	Vu07	36622120	[C/A]	SNP	0.211	0.264	0.258	3.522	PASS	PASS
2_46063	Cowpea_IT97K-499-35_v1.0	Vu07	36690267	[T/C]	SNP	0.293	0.378	0.368	3.517	PASS	PASS
2_32960	Cowpea_IT97K-499-35_v1.0	Vu07	36767070	[C/G]	SNP	0.279	0.34	0.332	3.511	PASS	PASS
2_08433	Cowpea_IT97K-499-35_v1.0	Vu07	36845505	[G/A]	SNP	0.343	0.315	0.147	3.504	PASS	PASS
2_21476	Cowpea_IT97K-499-35_v1.0	Vu07	36914124	[A/G]	SNP	0.394	0.41	0.479	3.498	PASS	PASS
2_19459	Cowpea_IT97K-499-35_v1.0	Vu07	36995019	[C/T]	SNP	0.314	0.426	0.258	3.49	PASS	PASS
2_26615	Cowpea_IT97K-499-35_v1.0	Vu07	37079932	[C/T]	SNP	0.321	0.383	2.248	3.48	PASS	PASS
2_06245	Cowpea_IT97K-499-35_v1.0	Vu07	37156724	[A/G]	SNP	0.296	0.34	0.405	3.471	PASS	PASS
2_16944	Cowpea_IT97K-499-35_v1.0	Vu07	37232708	[A/G]	SNP	0.473	0.5	0.479	3.462	PASS	PASS
2_55400	Cowpea_IT97K-499-35_v1.0	Vu07	37301758	[T/C]	SNP	0.491	0.475	2.874	3.453	PASS	PASS
2_12904	Cowpea_IT97K-499-35_v1.0	Vu07	37375510	[G/A]	SNP	0.405	0.484	0.442	3.443	PASS	PASS
2_12523	Cowpea_IT97K-499-35_v1.0	Vu07	37481066	[G/A]	SNP	0.13	0.258	0.074	3.428	PASS	PASS
2_11221	Cowpea_IT97K-499-35_v1.0	Vu07	37549774	[T/C]	SNP	0.263	0.345	0.332	3.417	PASS	PASS
2_12147	Cowpea_IT97K-499-35_v1.0	Vu07	37618669	[G/A]	SNP	0.36	0.456	0.184	3.406	PASS	PASS
2_21109	Cowpea_IT97K-499-35_v1.0	Vu07	37689256	[C/A]	SNP	0.361	0.448	0.147	3.395	PASS	PASS
2_29208	Cowpea_IT97K-499-35_v1.0	Vu07	37764142	[G/A]	SNP	0.319	0.407	1.621	3.382	PASS	PASS
2_20055	Cowpea_IT97K-499-35_v1.0	Vu07	37854649	[T/C]	SNP	0.455	0.435	0.221	3.367	PASS	PASS
2_16268	Cowpea_IT97K-499-35_v1.0	Vu07	37942235	[A/G]	SNP	0.295	0.264	0.258	3.351	PASS	PASS
2_53488	Cowpea_IT97K-499-35_v1.0	Vu07	38012747	[G/T]	SNP	0.185	0.274	1.179	3.338	PASS	PASS
2_53922	Cowpea_IT97K-499-35_v1.0	Vu07	38082355	[G/A]	SNP	0.255	0.179	0.368	3.326	PASS	PASS
2_51471	Cowpea_IT97K-499-35_v1.0	Vu07	38154042	[A/G]	SNP	0.383	0.484	0.626	3.312	PASS	PASS
2_18425	Cowpea_IT97K-499-35_v1.0	Vu07	38233651	[C/T]	SNP	0.336	0.41	0.847	3.297	PASS	PASS
2_41165	Cowpea_IT97K-499-35_v1.0	Vu07	38314593	[G/A]	SNP	0.311	0.383	4.274	3.281	PASS	PASS
2_54129	Cowpea_IT97K-499-35_v1.0	Vu07	38386010	[T/C]	SNP	0.383	0.416	0.368	3.268	PASS	PASS
2_21708	Cowpea_IT97K-499-35_v1.0	Vu07	38582627	[A/G]	SNP	0.258	0.168	0.295	3.23	PASS	PASS
2_01255	Cowpea_IT97K-499-35_v1.0	Vu07	38662696	[C/T]	SNP	0.352	0.37	0.405	3.215	PASS	PASS
2_16253	Cowpea_IT97K-499-35_v1.0	Vu07	38745167	[T/C]	SNP	0.431	0.481	0.111	3.199	PASS	PASS
2_54548	Cowpea_IT97K-499-35_v1.0	Vu07	38931103	[G/A]	SNP	0.288	0.255	0.295	3.166	PASS	PASS
2_01842	Cowpea_IT97K-499-35_v1.0	Vu07	39009372	[A/G]	SNP	0.26	0.44	0.074	3.153	PASS	PASS
2_33628	Cowpea_IT97K-499-35_v1.0	Vu07	39083635	[T/A]	SNP	0.446	0.348	0.332	3.141	PASS	PASS
2_37559	Cowpea_IT97K-499-35_v1.0	Vu07	39171806	[A/G]	SNP	0.225	0.313	0.295	3.128	PASS	PASS
2_05185	Cowpea_IT97K-499-35_v1.0	Vu07	39250080	[C/A]	SNP	0.408	0.464	0.59	3.117	PASS	PASS
2_18533	Cowpea_IT97K-499-35_v1.0	Vu07	39343220	[C/T]	SNP	0.289	0.459	0.332	3.106	PASS	PASS
2_23530	Cowpea_IT97K-499-35_v1.0	Vu07	39434792	[A/C]	SNP	0.426	0.323	0.074	3.1	PASS	PASS
2_55050	Cowpea_IT97K-499-35_v1.0	Vu07	39508529	[T/C]	SNP	0.404	0.422	1.879	3.1	PASS	PASS
2_13043	Cowpea_IT97K-499-35_v1.0	Vu07	39591601	[G/T]	SNP	0.194	0.353	0.147	3.1	PASS	PASS
2_17711	Cowpea_IT97K-499-35_v1.0	Vu07	39666885	[T/C]	SNP	0.265	0.356	0.184	3.1	PASS	PASS
2_55266	Cowpea_IT97K-499-35_v1.0	Vu07	39744825	[G/A]	SNP	0.173	0.253	0.295	3.1	PASS	PASS
2_14744	Cowpea_IT97K-499-35_v1.0	Vu07	39820360	[A/C]	SNP	0.234	0.323	0.221	3.1	PASS	PASS
2_12324	Cowpea_IT97K-499-35_v1.0	Vu07	39895265	[A/G]	SNP	0.284	0.219	0.368	3.1	PASS	PASS
2_31004	Cowpea_IT97K-499-35_v1.0	Vu07	40001260	[A/C]	SNP	0.319	0.441	4.053	3.1	PASS	PASS
2_00791	Cowpea_IT97K-499-35_v1.0	Vu07	40082160	[T/C]	SNP	0.319	0.217	0.921	3.1	PASS	PASS
2_05218	Cowpea_IT97K-499-35_v1.0	Vu07	40194684	[T/C]	SNP	0.288	0.201	0.074	3.1	PASS	PASS
2_46776	Cowpea_IT97K-499-35_v1.0	Vu07	40273386	[T/G]	SNP	0.393	0.476	0.442	3.1	PASS	PASS
2_49493	Cowpea_IT97K-499-35_v1.0	Vu07	40347626	[G/A]	SNP	0.375	0.31	0.774	3.1	PASS	PASS
2_31122	Cowpea_IT97K-499-35_v1.0	Vu07	40434237	[A/G]	SNP	0.387	0.34	0.258	3.1	PASS	PASS
1_0834	Cowpea_IT97K-499-35_v1.0	Vu07	40509315	[A/G]	SNP	0.345	0.318	0.184	3.1	PASS	PASS
2_01564	Cowpea_IT97K-499-35_v1.0	Vu07	40585060	[G/T]	SNP	0.448	0.407	0.184	3.1	PASS	PASS
2_17191	Cowpea_IT97K-499-35_v1.0	Vu07	40659215	[A/G]	SNP	0.374	0.332	0.368	3.1	PASS	PASS
2_07991	Cowpea_IT97K-499-35_v1.0	Vu07	40740551	[G/T]	SNP	0.396	0.467	0.553	3.1	PASS	PASS
2_09404	Cowpea_IT97K-499-35_v1.0	Vu07	40819061	[G/A]	SNP	0.439	0.489	0.405	3.1	PASS	PASS
2_47704	Cowpea_IT97K-499-35_v1.0	Vu08	126058	[T/C]	SNP	0.385	0.451	0.332	8.336	PASS	PASS
2_02595	Cowpea_IT97K-499-35_v1.0	Vu08	169814	[T/C]	SNP	0.488	0.446	0.442	8.336	PASS	PASS
2_24777	Cowpea_IT97K-499-35_v1.0	Vu08	204958	[T/C]	SNP	0.496	0.465	0.553	8.333	PASS	PASS
2_14063	Cowpea_IT97K-499-35_v1.0	Vu08	235913	[G/A]	SNP	0.375	0.435	0.258	8.273	PASS	PASS
2_54903	Cowpea_IT97K-499-35_v1.0	Vu08	305902	[A/T]	SNP	0.372	0.203	0.59	8.141	PASS	PASS
2_31347	Cowpea_IT97K-499-35_v1.0	Vu08	341783	[G/A]	SNP	0.428	0.269	0.221	8.074	PASS	PASS
2_28185	Cowpea_IT97K-499-35_v1.0	Vu08	382099	[T/G]	SNP	0.468	0.489	0.405	7.999	PASS	PASS
2_04503	Cowpea_IT97K-499-35_v1.0	Vu08	420378	[G/T]	SNP	0.127	0.14	0.958	7.928		PASS
2_18377	Cowpea_IT97K-499-35_v1.0	Vu08	621699	[G/A]	SNP	0.262	0.287	0.479	7.569	PASS	PASS
2_49204	Cowpea_IT97K-499-35_v1.0	Vu08	664131	[C/A]	SNP	0.416	0.394	0.295	7.495	PASS	PASS
2_50906	Cowpea_IT97K-499-35_v1.0	Vu08	710060	[A/C]	SNP	0.428	0.372	0.368	7.416	PASS	PASS
2_33264	Cowpea_IT97K-499-35_v1.0	Vu08	752891	[C/G]	SNP	0.338	0.5	0.111	7.344	PASS	PASS
2_41194	Cowpea_IT97K-499-35_v1.0	Vu08	858802	[A/C]	SNP	0.253	0.142	0.553	7.167	PASS	PASS
2_33981	Cowpea_IT97K-499-35_v1.0	Vu08	967846	[T/A]	SNP	0.198	0.191	0.553	6.989		PASS
2_30416	Cowpea_IT97K-499-35_v1.0	Vu08	1076074	[T/C]	SNP	0.097	0.156	0.147	6.817		PASS
2_06647	Cowpea_IT97K-499-35_v1.0	Vu08	1323060	[C/A]	SNP	0.361	0.438	0.258	6.441	PASS	PASS
2_30345	Cowpea_IT97K-499-35_v1.0	Vu08	1363230	[C/A]	SNP	0.456	0.473	0.626	6.382	PASS	PASS
2_31913	Cowpea_IT97K-499-35_v1.0	Vu08	1404418	[G/A]	SNP	0.209	0.274	0.737	6.322	PASS	PASS
2_30163	Cowpea_IT97K-499-35_v1.0	Vu08	1443827	[G/T]	SNP	0.283	0.389	0.295	6.265	PASS	PASS
2_53643	Cowpea_IT97K-499-35_v1.0	Vu08	1482366	[T/C]	SNP	0.392	0.476	0.442	6.21	PASS	PASS
2_17887	Cowpea_IT97K-499-35_v1.0	Vu08	1556316	[A/G]	SNP	0.354	0.31	0.442	6.106	PASS	PASS
2_30172	Cowpea_IT97K-499-35_v1.0	Vu08	1597486	[A/G]	SNP	0.261	0.242	0.074	6.048	PASS	PASS
2_45205	Cowpea_IT97K-499-35_v1.0	Vu08	1639135	[T/G]	SNP	0.283	0.293	0.295	5.991	PASS	PASS
2_21756	Cowpea_IT97K-499-35_v1.0	Vu08	1687713	[G/A]	SNP	0.409	0.383	0.184	5.925	PASS	PASS
2_02933	Cowpea_IT97K-499-35_v1.0	Vu08	1774994	[A/G]	SNP	0.381	0.372	0.184	5.807	PASS	PASS
1_0095	Cowpea_IT97K-499-35_v1.0	Vu08	1863109	[C/A]	SNP	0.408	0.497	0.147	5.691	PASS	PASS
2_25275	Cowpea_IT97K-499-35_v1.0	Vu08	1910977	[C/A]	SNP	0.292	0.314	0.7	5.629	PASS	PASS
2_21676	Cowpea_IT97K-499-35_v1.0	Vu08	1965505	[A/G]	SNP	0.329	0.356	0.037	5.56	PASS	PASS
2_40337	Cowpea_IT97K-499-35_v1.0	Vu08	2013872	[C/T]	SNP	0.41	0.48	5.527	5.498	PASS	PASS
2_03924	Cowpea_IT97K-499-35_v1.0	Vu08	2062424	[G/A]	SNP	0.185	0.255	0.111	5.438	PASS	PASS
2_47605	Cowpea_IT97K-499-35_v1.0	Vu08	2190881	[C/T]	SNP	0.488	0.41	0.332	5.28	PASS	PASS
2_14158	Cowpea_IT97K-499-35_v1.0	Vu08	2338416	[C/T]	SNP	0.342	0.337	0.221	5.105	PASS	PASS
2_41533	Cowpea_IT97K-499-35_v1.0	Vu08	2384265	[A/G]	SNP	0.467	0.404	0.7	5.052	PASS	PASS
2_12008	Cowpea_IT97K-499-35_v1.0	Vu08	2443373	[A/G]	SNP	0.403	0.334	0.147	4.984	PASS	PASS
2_08910	Cowpea_IT97K-499-35_v1.0	Vu08	2507642	[T/C]	SNP	0.428	0.402	0.258	4.912	PASS	PASS
2_31201	Cowpea_IT97K-499-35_v1.0	Vu08	2558953	[C/T]	SNP	0.256	0.22	0.258	4.854	PASS	PASS
2_06294	Cowpea_IT97K-499-35_v1.0	Vu08	2619828	[G/T]	SNP	0.445	0.473	0.368	4.787	PASS	PASS
2_08836	Cowpea_IT97K-499-35_v1.0	Vu08	2700253	[T/G]	SNP	0.446	0.421	0.147	4.7	PASS	PASS
2_06539	Cowpea_IT97K-499-35_v1.0	Vu08	2798000	[C/T]	SNP	0.261	0.207	0.626	4.597	PASS	PASS
2_41269	Cowpea_IT97K-499-35_v1.0	Vu08	2860724	[A/C]	SNP	0.255	0.228	0.184	4.531	PASS	PASS
2_21279	Cowpea_IT97K-499-35_v1.0	Vu08	3014854	[A/C]	SNP	0.38	0.344	0.59	4.375	PASS	PASS
2_55347	Cowpea_IT97K-499-35_v1.0	Vu08	3088824	[A/G]	SNP	0.247	0.269	0.405	4.302	PASS	PASS
2_54533	Cowpea_IT97K-499-35_v1.0	Vu08	3194962	[A/C]	SNP	0.302	0.329	3.979	4.199	PASS	PASS
2_25002	Cowpea_IT97K-499-35_v1.0	Vu08	3368913	[C/A]	SNP	0.249	0.25	0.405	4.036	PASS	PASS
2_51254	Cowpea_IT97K-499-35_v1.0	Vu08	3428605	[T/C]	SNP	0.221	0.251	0.7	3.981	PASS	PASS
2_19197	Cowpea_IT97K-499-35_v1.0	Vu08	3539859	[T/C]	SNP	0.3	0.44	0.442	3.881	PASS	PASS
2_20752	Cowpea_IT97K-499-35_v1.0	Vu08	3608322	[G/T]	SNP	0.224	0.361	0.405	3.821	PASS	PASS
2_09961	Cowpea_IT97K-499-35_v1.0	Vu08	3674136	[T/C]	SNP	0.224	0.38	0.332	3.764	PASS	PASS
2_24881	Cowpea_IT97K-499-35_v1.0	Vu08	3763541	[C/A]	SNP	0.26	0.429	0.405	3.688	PASS	PASS
2_03391	Cowpea_IT97K-499-35_v1.0	Vu08	3833331	[G/A]	SNP	0.436	0.359	0.221	3.63	PASS	PASS
2_13241	Cowpea_IT97K-499-35_v1.0	Vu08	3901202	[T/C]	SNP	0.312	0.266	0.663	3.574	PASS	PASS
2_13165	Cowpea_IT97K-499-35_v1.0	Vu08	3968475	[T/G]	SNP	0.373	0.367	0.295	3.52	PASS	PASS
2_14163	Cowpea_IT97K-499-35_v1.0	Vu08	4126506	[G/A]	SNP	0.264	0.207	0.295	3.395	PASS	PASS
2_26002	Cowpea_IT97K-499-35_v1.0	Vu08	4224961	[T/C]	SNP	0.403	0.246	0.516	3.32	PASS	PASS
2_14270	Cowpea_IT97K-499-35_v1.0	Vu08	4384669	[C/A]	SNP	0.314	0.364	0.074	3.201	PASS	PASS
2_54742	Cowpea_IT97K-499-35_v1.0	Vu08	4539733	[G/A]	SNP	0.335	0.405	0.368	3.089	PASS	PASS
1_0819	Cowpea_IT97K-499-35_v1.0	Vu08	4616655	[T/A]	SNP	0.411	0.221	0.663	3.035	PASS	PASS
2_50408	Cowpea_IT97K-499-35_v1.0	Vu08	4699423	[C/A]	SNP	0.499	0.332	0.332	2.978	PASS	PASS
2_10007	Cowpea_IT97K-499-35_v1.0	Vu08	4796877	[C/T]	SNP	0.295	0.367	0.405	2.912	PASS	PASS
2_13785	Cowpea_IT97K-499-35_v1.0	Vu08	4881802	[T/G]	SNP	0.442	0.349	1.032	2.856	PASS	PASS
2_27592	Cowpea_IT97K-499-35_v1.0	Vu08	4991448	[A/G]	SNP	0.452	0.321	0.368	2.785	PASS	PASS
2_47203	Cowpea_IT97K-499-35_v1.0	Vu08	5109421	[C/A]	SNP	0.461	0.406	1.032	2.71	PASS	PASS
2_38503	Cowpea_IT97K-499-35_v1.0	Vu08	5217513	[A/G]	SNP	0.347	0.494	1.584	2.643	PASS	PASS
2_54255	Cowpea_IT97K-499-35_v1.0	Vu08	5342353	[A/G]	SNP	0.362	0.486	0.995	2.568	PASS	PASS
2_48039	Cowpea_IT97K-499-35_v1.0	Vu08	5441132	[G/A]	SNP	0.335	0.486	0.258	2.51	PASS	PASS
2_48080	Cowpea_IT97K-499-35_v1.0	Vu08	5580980	[A/G]	SNP	0.223	0.37	2.137	2.43	PASS	PASS
2_48895	Cowpea_IT97K-499-35_v1.0	Vu08	5686133	[T/C]	SNP	0.333	0.325	0.811	2.371	PASS	PASS
2_06288	Cowpea_IT97K-499-35_v1.0	Vu08	5831843	[T/G]	SNP	0.418	0.408	0.221	2.292	PASS	PASS
2_45373	Cowpea_IT97K-499-35_v1.0	Vu08	6008295	[A/G]	SNP	0.308	0.219	8.401	2.199	PASS	PASS
2_29242	Cowpea_IT97K-499-35_v1.0	Vu08	6317929	[G/A]	SNP	0.383	0.411	9.985	2.045	PASS	PASS
2_02342	Cowpea_IT97K-499-35_v1.0	Vu08	6460136	[G/A]	SNP	0.269	0.245	0.111	1.977	PASS	PASS
2_39559	Cowpea_IT97K-499-35_v1.0	Vu08	6607238	[A/G]	SNP	0.41	0.492	0.663	1.909	PASS	PASS
2_33049	Cowpea_IT97K-499-35_v1.0	Vu08	6736491	[A/T]	SNP	0.374	0.321	0.442	1.851	PASS	PASS
2_28951	Cowpea_IT97K-499-35_v1.0	Vu08	6926770	[C/T]	SNP	0.257	0.27	0.295	1.768	PASS	PASS
2_23124	Cowpea_IT97K-499-35_v1.0	Vu08	7074500	[C/T]	SNP	0.494	0.37	0.074	1.706	PASS	PASS
2_37926	Cowpea_IT97K-499-35_v1.0	Vu08	7238961	[C/A]	SNP	0.248	0.351	0.479	1.639	PASS	PASS
2_00857	Cowpea_IT97K-499-35_v1.0	Vu08	7392202	[T/G]	SNP	0.256	0.369	0.332	1.579	PASS	PASS
2_15072	Cowpea_IT97K-499-35_v1.0	Vu08	7542199	[T/G]	SNP	0.483	0.375	0.074	1.521	PASS	PASS
2_41797	Cowpea_IT97K-499-35_v1.0	Vu08	7918648	[G/A]	SNP	0.497	0.389	1.29	1.385	PASS	PASS
2_47302	Cowpea_IT97K-499-35_v1.0	Vu08	8138650	[T/C]	SNP	0.352	0.317	2.579	1.31	PASS	PASS
2_32277	Cowpea_IT97K-499-35_v1.0	Vu08	8393586	[G/A]	SNP	0.31	0.291	0.663	1.226	PASS	PASS
2_38043	Cowpea_IT97K-499-35_v1.0	Vu08	8599162	[C/T]	SNP	0.349	0.279	0.59	1.162	PASS	PASS
2_44653	Cowpea_IT97K-499-35_v1.0	Vu08	8871431	[C/T]	SNP	0.397	0.374	0.737	1.082	PASS	PASS
2_43474	Cowpea_IT97K-499-35_v1.0	Vu08	9118871	[G/A]	SNP	0.406	0.42	1.069	1.012	PASS	PASS
2_44599	Cowpea_IT97K-499-35_v1.0	Vu08	9368094	[A/G]	SNP	0.299	0.254	5.195	0.945	PASS	PASS
2_51186	Cowpea_IT97K-499-35_v1.0	Vu08	9757691	[C/A]	SNP	0.297	0.253	0.737	0.847	PASS	PASS
2_08883	Cowpea_IT97K-499-35_v1.0	Vu08	10083650	[A/G]	SNP	0.484	0.415	0.295	0.771	PASS	PASS
2_30912	Cowpea_IT97K-499-35_v1.0	Vu08	10310999	[A/G]	SNP	0.451	0.465	0.295	0.721	PASS	PASS
2_44771	Cowpea_IT97K-499-35_v1.0	Vu08	10729562	[T/C]	SNP	0.341	0.314	0.995	0.635	PASS	PASS
2_42607	Cowpea_IT97K-499-35_v1.0	Vu08	11012104	[C/T]	SNP	0.468	0.432	0.737	0.581	PASS	PASS
2_53531	Cowpea_IT97K-499-35_v1.0	Vu08	11299449	[T/C]	SNP	0.484	0.467	0.884	0.53	PASS	PASS
2_43090	Cowpea_IT97K-499-35_v1.0	Vu08	11684778	[C/T]	SNP	0.389	0.302	0.184	0.467	PASS	PASS
2_53007	Cowpea_IT97K-499-35_v1.0	Vu08	12062656	[A/G]	SNP	0.296	0.288	0.884	0.41	PASS	PASS
2_40113	Cowpea_IT97K-499-35_v1.0	Vu08	12513705	[G/A]	SNP	0.227	0.255	0.59	0.35	PASS	PASS
2_10658	Cowpea_IT97K-499-35_v1.0	Vu08	15346858	[G/A]	SNP	0.352	0.291	0.368	0.134	PASS	PASS
2_54501	Cowpea_IT97K-499-35_v1.0	Vu08	16564005	[A/G]	SNP	0.352	0.307	0.442	0.122	PASS	PASS
2_47937	Cowpea_IT97K-499-35_v1.0	Vu08	17423581	[A/G]	SNP	0.389	0.497	0.442	0.14	PASS	PASS
2_45231	Cowpea_IT97K-499-35_v1.0	Vu08	18115392	[A/G]	SNP	0.304	0.44	0.553	0.17	PASS	PASS
2_02798	Cowpea_IT97K-499-35_v1.0	Vu08	18714738	[A/G]	SNP	0.189	0.25	0.111	0.207	PASS	PASS
2_43529	Cowpea_IT97K-499-35_v1.0	Vu08	20159450	[T/C]	SNP	0.403	0.375	0.405	0.336	PASS	PASS
2_40435	Cowpea_IT97K-499-35_v1.0	Vu08	20618848	[T/C]	SNP	0.402	0.375	0.442	0.388	PASS	PASS
2_40091	Cowpea_IT97K-499-35_v1.0	Vu08	20984318	[T/C]	SNP	0.14	0.291	2.1	0.433	PASS	PASS
2_51140	Cowpea_IT97K-499-35_v1.0	Vu08	21942062	[A/G]	SNP	0.347	0.315	0.774	0.566	PASS	PASS
2_15475	Cowpea_IT97K-499-35_v1.0	Vu08	22234845	[A/G]	SNP	0.328	0.329	0.479	0.611	PASS	PASS
2_46306	Cowpea_IT97K-499-35_v1.0	Vu08	23807651	[C/T]	SNP	0.271	0.451	0.332	0.88	PASS	PASS
2_41647	Cowpea_IT97K-499-35_v1.0	Vu08	24284704	[C/T]	SNP	0.412	0.438	4.164	0.971	PASS	PASS
2_23804	Cowpea_IT97K-499-35_v1.0	Vu08	24531221	[A/G]	SNP	0.268	0.438	0.037	1.02	PASS	PASS
2_43217	Cowpea_IT97K-499-35_v1.0	Vu08	24881212	[A/G]	SNP	0.287	0.457	0.995	1.091	PASS	PASS
2_41157	Cowpea_IT97K-499-35_v1.0	Vu08	25086310	[G/A]	SNP	0.46	0.398	2.137	1.133	PASS	PASS
2_38551	Cowpea_IT97K-499-35_v1.0	Vu08	25299581	[T/C]	SNP	0.442	0.311	0.626	1.178	PASS	PASS
2_21207	Cowpea_IT97K-499-35_v1.0	Vu08	25489764	[T/G]	SNP	0.436	0.383	0.258	1.219	PASS	PASS
2_43085	Cowpea_IT97K-499-35_v1.0	Vu08	25841884	[T/C]	SNP	0.279	0.478	1.326	1.296	PASS	PASS
2_07352	Cowpea_IT97K-499-35_v1.0	Vu08	26024534	[A/G]	SNP	0.2	0.399	0.479	1.337	PASS	PASS
2_29311	Cowpea_IT97K-499-35_v1.0	Vu08	26210322	[G/T]	SNP	0.274	0.47	0.442	1.379	PASS	PASS
2_48783	Cowpea_IT97K-499-35_v1.0	Vu08	26374675	[C/T]	SNP	0.268	0.462	7.59	1.416	PASS	PASS
2_45208	Cowpea_IT97K-499-35_v1.0	Vu08	26551182	[T/C]	SNP	0.286	0.495	0.405	1.457	PASS	PASS
2_24552	Cowpea_IT97K-499-35_v1.0	Vu08	26707369	[T/C]	SNP	0.242	0.494	1.99	1.494	PASS	PASS
2_50684	Cowpea_IT97K-499-35_v1.0	Vu08	26860583	[G/A]	SNP	0.298	0.149	0.405	1.53	PASS	PASS
2_43810	Cowpea_IT97K-499-35_v1.0	Vu08	27086195	[G/A]	SNP	0.289	0.489	4.311	1.584	PASS	PASS
2_07106	Cowpea_IT97K-499-35_v1.0	Vu08	27242347	[A/G]	SNP	0.258	0.481	0.074	1.621	PASS	PASS
2_34731	Cowpea_IT97K-499-35_v1.0	Vu08	27383192	[T/A]	SNP	0.425	0.367	0.332	1.656	PASS	PASS
2_42285	Cowpea_IT97K-499-35_v1.0	Vu08	27522556	[A/G]	SNP	0.317	0.473	0.479	1.69	PASS	PASS
2_54124	Cowpea_IT97K-499-35_v1.0	Vu08	27656910	[A/G]	SNP	0.338	0.497	0.516	1.723	PASS	PASS
2_07997	Cowpea_IT97K-499-35_v1.0	Vu08	27854827	[G/A]	SNP	0.251	0.291	0.111	1.773	PASS	PASS
2_30194	Cowpea_IT97K-499-35_v1.0	Vu08	27984216	[A/G]	SNP	0.349	0.467	0.295	1.805	PASS	PASS
2_43353	Cowpea_IT97K-499-35_v1.0	Vu08	28114824	[G/A]	SNP	0.32	0.232	0.774	1.838	PASS	PASS
2_50789	Cowpea_IT97K-499-35_v1.0	Vu08	28244435	[T/G]	SNP	0.466	0.36	0.774	1.871	PASS	PASS
2_17198	Cowpea_IT97K-499-35_v1.0	Vu08	28371591	[T/C]	SNP	0.315	0.37	0.111	1.904	PASS	PASS
2_27827	Cowpea_IT97K-499-35_v1.0	Vu08	28508351	[G/A]	SNP	0.291	0.416	0.332	1.94	PASS	PASS
2_21555	Cowpea_IT97K-499-35_v1.0	Vu08	28632014	[A/G]	SNP	0.45	0.456	0.59	1.972	PASS	PASS
2_34075	Cowpea_IT97K-499-35_v1.0	Vu08	28771743	[T/A]	SNP	0.368	0.464	1.326	2.008	PASS	PASS
2_41486	Cowpea_IT97K-499-35_v1.0	Vu08	28893562	[T/G]	SNP	0.465	0.345	1.069	2.041	PASS	PASS
2_48406	Cowpea_IT97K-499-35_v1.0	Vu08	29030541	[C/T]	SNP	0.391	0.351	0.479	2.077	PASS	PASS
2_45357	Cowpea_IT97K-499-35_v1.0	Vu08	29138832	[A/G]	SNP	0.317	0.443	1.4	2.106	PASS	PASS
2_17695	Cowpea_IT97K-499-35_v1.0	Vu08	29253841	[A/C]	SNP	0.237	0.437	0.184	2.137	PASS	PASS
2_07509	Cowpea_IT97K-499-35_v1.0	Vu08	29415143	[G/A]	SNP	0.311	0.258	0.074	2.18	PASS	PASS
2_33269	Cowpea_IT97K-499-35_v1.0	Vu08	29596336	[T/A]	SNP	0.289	0.296	0.147	2.229	PASS	PASS
2_05968	Cowpea_IT97K-499-35_v1.0	Vu08	29708502	[T/C]	SNP	0.322	0.321	0.295	2.26	PASS	PASS
2_13558	Cowpea_IT97K-499-35_v1.0	Vu08	29825679	[C/A]	SNP	0.233	0.273	0.184	2.292	PASS	PASS
2_55047	Cowpea_IT97K-499-35_v1.0	Vu08	29933767	[A/G]	SNP	0.3	0.246	0.332	2.322	PASS	PASS
2_48873	Cowpea_IT97K-499-35_v1.0	Vu08	30035188	[C/A]	SNP	0.395	0.457	4.053	2.35	PASS	PASS
2_51396	Cowpea_IT97K-499-35_v1.0	Vu08	30138434	[T/C]	SNP	0.391	0.464	1.474	2.379	PASS	PASS
2_31501	Cowpea_IT97K-499-35_v1.0	Vu08	30248815	[T/C]	SNP	0.271	0.266	0.442	2.41	PASS	PASS
2_53715	Cowpea_IT97K-499-35_v1.0	Vu08	30343060	[G/T]	SNP	0.281	0.272	0.037	2.436	PASS	PASS
2_11372	Cowpea_IT97K-499-35_v1.0	Vu08	30436772	[G/A]	SNP	0.432	0.331	0.221	2.462	PASS	PASS
2_01816	Cowpea_IT97K-499-35_v1.0	Vu08	30537607	[C/T]	SNP	0.459	0.399	0.258	2.491	PASS	PASS
2_22794	Cowpea_IT97K-499-35_v1.0	Vu08	30638631	[A/C]	SNP	0.428	0.451	0.221	2.519	PASS	PASS
2_31646	Cowpea_IT97K-499-35_v1.0	Vu08	30741831	[G/T]	SNP	0.355	0.31	0.332	2.549	PASS	PASS
2_26902	Cowpea_IT97K-499-35_v1.0	Vu08	30906704	[G/A]	SNP	0.313	0.486	1.105	2.595	PASS	PASS
2_54606	Cowpea_IT97K-499-35_v1.0	Vu08	31000215	[A/G]	SNP	0.314	0.443	0.405	2.622	PASS	PASS
1_1419	Cowpea_IT97K-499-35_v1.0	Vu08	31115514	[C/G]	SNP	0.333	0.22	0.442	2.655	PASS	PASS
2_03284	Cowpea_IT97K-499-35_v1.0	Vu08	31209317	[C/T]	SNP	0.443	0.359	0.368	2.682	PASS	PASS
2_49940	Cowpea_IT97K-499-35_v1.0	Vu08	31296728	[T/C]	SNP	0.221	0.429	0.074	2.707	PASS	PASS
2_27575	Cowpea_IT97K-499-35_v1.0	Vu08	31380509	[C/T]	SNP	0.498	0.405	0.258	2.731	PASS	PASS
2_14484	Cowpea_IT97K-499-35_v1.0	Vu08	31464999	[A/G]	SNP	0.5	0.497	0.368	2.756	PASS	PASS
2_04896	Cowpea_IT97K-499-35_v1.0	Vu08	31585133	[G/A]	SNP	0.234	0.37	0.221	2.79	PASS	PASS
2_02353	Cowpea_IT97K-499-35_v1.0	Vu08	31825955	[C/T]	SNP	0.424	0.383	0.221	2.86	PASS	PASS
[truncated: 761 more rows]
