# Supplementary material for: A Mid-Density Single-Nucleotide Polymorphism Panel for Molecular Applications in Cowpea (Vigna unguiculata (L.) Walp)
Source: Int J Genomics. 2024 Jan 9;2024:9912987. doi: 10.1155/2024/9912987 (PMC10791481; doi:10.1155/2024/9912987)
Supplement: Supplementary 4 — Table 3: chromosome-wide SNP density and distance between SNPs. [file 9912987.f4.docx]

**Supplementary Table 3** Chromosome-wise SNP density and distance between SNPs

| Chr | Start-End pos (bp) | Length (Mb)a | | SNPs/Chrb | Densityc | SNPs Dist(Mb)d |
| --- | --- | --- | --- | --- | --- | --- |
| VU01 | 78762-42014104 | 41.94 | | 188 | 4.48 | 0.22 |
| VU02 | 71029-33817793 | 33.75 | | 169 | 5.01 | 0.2 |
| VU03 | 255395-65242470 | 64.99 | | 295 | 4.54 | 0.22 |
| VU04 | 351398-42555590 | 42.2 | | 191 | 4.53 | 0.22 |
| VU05 | 216823-48682333 | 48.47 | | 188 | 3.88 | 0.26 |
| VU06 | 124432-34261190 | 34.14 | | 197 | 5.77 | 0.17 |
| VU07 | 51380-40659215 | 40.61 | | 256 | 6.3 | 0.16 |
| VU08 | 126058-38248903 | 38.12 | | 193 | 5.06 | 0.2 |
| VU09 | 38839-43850276 | 43.81 | | 219 | 5 | 0.2 |
| VU10 | 72119-41297765 | 41.23 | | 165 | 4 | 0.25 |
| VU11 | 50894-41324185 | 41.27 | | 169 | 4.09 | 0.24 |
| Min |  | 33.75 | | 165 | 3.88 | 0.16 |
| Max |  | 64.99 | | 295 | 6.3 | 0.26 |
| Mean |  | 42.77 | | 202.73 | 4.79 | 0.21 |
| aChromosome length in million base pairs | | | |
| bNumber of SNPs per chromosome | | | |

cSNP Density computed as the ratio of the number of SNPs to the chromosome length (Number of SNPs per unit Mb)

dAverage distance between SNPs computed as the ratio of chromosome length to the number of SNPs
